# Supplementary material for: Plagiarism in research: a survey of African medical journals
Source: PubMed Central journal article supplement — BMJ Open. 2018 Nov 8;8(11):e024777. doi: 10.1136/bmjopen-2018-024777 (PMC6231593; doi:10.1136/bmjopen-2018-024777), 2018-11-08
Supplement: bmjopen-2018-024777.draft_revisions.pdf [file bmjopen-2018-024777.draft_revisions.pdf]

# BMJ Open

BMJ Open is committed to open peer review. As part of this commitment we make the peer review history of every article we publish publicly available.

When an article is published we post the peer reviewers' comments and the authors' responses online. We also post the versions of the paper that were used during peer review. These are the versions that the peer review comments apply to.

The versions of the paper that follow are the versions that were submitted during the peer review process. They are not the versions of record or the final published versions. They should not be cited or distributed as the published version of this manuscript.

BMJ Open is an open access journal and the full, final, typeset and author-corrected version of record of the manuscript is available on our site with no access controls, subscription charges or pay-per-view fees (<http://bmjopen.bmj.com>).

If you have any questions on BMJ Open's open peer review process please email [info.bmjopen@bmj.com](mailto:info.bmjopen@bmj.com)

# BMJ Open

## Plagiarism in research: a survey of regional medical journals

|                               |                                                                                                                                                                                                                                                                                                                                                                                                                                                                                             |
|-------------------------------|---------------------------------------------------------------------------------------------------------------------------------------------------------------------------------------------------------------------------------------------------------------------------------------------------------------------------------------------------------------------------------------------------------------------------------------------------------------------------------------------|
| Journal:                      | <i>BMJ Open</i>                                                                                                                                                                                                                                                                                                                                                                                                                                                                             |
| Manuscript ID                 | bmjopen-2018-024777                                                                                                                                                                                                                                                                                                                                                                                                                                                                         |
| Article Type:                 | Research                                                                                                                                                                                                                                                                                                                                                                                                                                                                                    |
| Date Submitted by the Author: | 13-Jun-2018                                                                                                                                                                                                                                                                                                                                                                                                                                                                                 |
| Complete List of Authors:     | Rohwer, Anke; Stellenbosch University, Centre for Evidence-based Health Care, Division of Epidemiology and Biostatistics, Faculty of Medicine and Health Sciences<br>Wager, Elizabeth; Sideview,<br>Young, Taryn; Stellenbosch University, Centre for Evidence-based Health Care, Faculty of Medicine and Health Sciences; South African Medical Research Council, South African Cochrane Centre<br>Garner, Paul; Liverpool School of Tropical Medicine, Cochrane Infectious Diseases Group |
| Keywords:                     | Plagiarism, text-matching software, journal policies, regional journals                                                                                                                                                                                                                                                                                                                                                                                                                     |
|                               |                                                                                                                                                                                                                                                                                                                                                                                                                                                                                             |

SCHOLARONE™  
Manuscripts

Peer Review Only

## Plagiarism in research: a survey of regional medical journals

Anke Rohwer<sup>1</sup>, Elizabeth Wager<sup>2,3</sup>, Taryn Young<sup>1</sup>, Paul Garner<sup>4</sup>

<sup>1</sup>Centre for Evidence-based Health Care, Division of Epidemiology and Biostatistics, Faculty of Medicine and Health Sciences, Stellenbosch University, Cape Town, South Africa

<sup>2</sup>Sideview, Princes Risborough, UK

<sup>3</sup>School of Medicine, University of Split, Croatia

<sup>4</sup>Department of Clinical Sciences, Liverpool School of Tropical Medicine, Liverpool, UK

Corresponding author: Anke Rohwer

Centre for Evidence-based Health Care, Division of Epidemiology and Biostatistics,  
Faculty of Medicine and Health Sciences, Stellenbosch University,  
Francie van Zijl drive, Parow 7500

Tel: +27-21-9389886

Email: [arohwer@sun.ac.za](mailto:arohwer@sun.ac.za)

Word count: 3135 words

### Keywords:

Plagiarism, text-matching software, journal policies, regional journals

## Abstract

### Objectives

To examine whether regional biomedical journals in Africa had policies on plagiarism and procedures to detect it; and to measure the extent of plagiarism in their original research articles and reviews.

### Design

Cross-sectional survey

### Setting and participants

We selected journals with an editor-in-chief in Africa, a publisher based in a low-or middle-income country (LMIC), and with author guidelines in English, and systematically searched the Africa Journals Online database (AJOL). From each of the 100 journals identified, we randomly selected five original research articles or reviews published in 2016.

### Outcomes

For included journals, we examined the presence of plagiarism policies and whether they referred to text-matching software. We submitted articles to Turnitin and measured the extent of plagiarism (copying of someone else's work) or redundancy (copying of one's own work) against a set of criteria we had developed and piloted.

### Results

Of the 100 journals, 26 had a policy on plagiarism, and 16 referred to text-matching software. Of 495 articles, 313 (63%; 95%CI 58 to 68%) of articles had evidence of plagiarism: 17% (83) had at least four linked copied or more than six individual copied sentences; 19% (96) had three to six copied sentences, and the remainder had one or two copied sentences. Plagiarism was more common in the introduction and discussion, and uncommon in the results.

### Conclusion

Plagiarism is common in biomedical research articles and reviews published in Africa. Whilst wholesale plagiarism was uncommon, moderate text plagiarism was extensive. This can rapidly be eliminated if journal editors implement screening strategies including text-matching software.

### Strengths and Limitations

- We examined plagiarism policies and practices of African biomedical journals and measured plagiarism in articles.
- Our framework is unique in classifying the extent of plagiarism beyond the overall similarity index.
- Our approach is limited to plagiarism of text and does not take into account plagiarism of images and data, which is also a limitation of text-matching software.
- Although the African Journals Online database contains a large number of biomedical journals, it is not representative of all African journals.
- This study is the first to show that plagiarism of text is common in African biomedical journals.

## Introduction

Plagiarism is a serious form of research misconduct when authors copy text, ideas or images from another source, without properly referencing the source.<sup>1</sup> The severity varies from copying short phrases to copying of a whole paper. Besides the amount of text that is copied, assessors should consider how it was referenced, whether it was intentional or not, as well as whether the copied text is a commonly used or an original phrase.<sup>2,3</sup> Redundant publication is an umbrella term for reusing one's own work and ranges from reusing large parts of already published text (text-recycling), to publishing parts of the same study in more than one paper (salami slicing) and republishing entire papers (duplicate publication) and is also considered poor practice.<sup>4,5</sup>

The availability of material on the internet facilitates mosaic writing and plagiarism, and the widespread availability of text-matching software has improved detection so there is now more awareness of research integrity and research misconduct, including plagiarism. Large publishing houses now use Turnitin/the CrossRef Similarity Check routinely.<sup>6,7</sup> However, publishing practices in some low-and middle-income countries (LMICs) are still embedded in small volunteer editorial teams in university or professional society journals and may have fallen behind policies and procedures adopted in the USA, Europe and other high-income regions. Thus, science is at risk as researchers are under pressure to publish for promotion and short cuts can include plagiarism - particularly if they know that journals do not have policies or procedures to implement them.<sup>8</sup> Yet these are the very journals publishing research relevant to the region, which are avidly advocated to help demonstrate regional research excellence.<sup>9</sup>

Policies are clearly available through the Committee on Publication Ethics (COPE), encouraging journal editors to screen submitted manuscripts for plagiarism.<sup>10</sup> Publishing systems and standards have advanced rapidly with online publishing in a global world, and there are some cooperative programmes between the big and local players to help local players keep up with advances. An example of this is the African Journals Partnership Project (AJPP), a programme that partners African journals with mentor journals from the USA and UK.<sup>11</sup>

Estimates of the occurrence of plagiarism are largely based on studies conducted in high-income countries. Self-reported plagiarism estimates reported in a systematic review are 1.7% (95%CI 1.2 to 2.4) for participants admitting to having plagiarised and 30% (95% CI 17 to 46) for participants knowing about others who had done so.<sup>12</sup> However, none of the included studies were conducted in LMICs, although we know from our own work that Cochrane authors in Africa and other LMICs report plagiarism is common in host institutions.<sup>8</sup> Any self-reported estimate is probably not an accurate reflection of actual practice, mainly due to social-desirability bias.<sup>13</sup>

We sought to examine whether regional biomedical journals in Africa had policies on plagiarism and procedures to detect it; and to measure the extent of plagiarism in their original research articles.

## Methods

### Study design and sample

We surveyed original research articles published in biomedical journals indexed on Africa Journals Online database (AJOL). Journals were eligible if their current editor-in-chief was based in Africa, the publisher was based in a LMIC (according to the World Bank),<sup>14</sup> if policies and author guidelines were available in English and if the journal published an issue in 2016. All eligible journals were selected. From each eligible journal, we selected published articles published in 2016 as original research articles, including qualitative and quantitative primary studies, literature reviews and systematic reviews, published in English. We excluded editorials and letters. We used a computer-generated list of random numbers to select five articles from each eligible journal. We selected five articles per

1  
2  
3 journal, as initial scoping of journals indexed on AJOL revealed substantial variation in the number of  
4 published articles per issue, as well as the number of published issues per year.

## 5 6 Data collection

7 For eligible journals, we downloaded policies and author instructions from the journal's website. We  
8 extracted data on the presence and content of policies and guidelines on plagiarism. For original  
9 research articles, we downloaded the full text (PDF) of each article. We extracted data on the  
10 number of authors, country of corresponding author and type of study. One author (AR) extracted  
11 data using a pre-specified, piloted data extraction form (Supplementary file 1) and entered it into  
12 Excel.

13  
14 We measured the presence and extent of plagiarism (copying of someone else's work) and  
15 redundancy (copying of one's own work) in all included research articles. We submitted the PDFs of  
16 all articles to Turnitin text-matching software. Turnitin generated a similarity report containing the  
17 overall similarity index (OSI), expressed as the percentage of matching text,<sup>15</sup> excluding quotations  
18 and references. We manually reviewed all similarity reports with the plagiarism framework (Table 1).  
19 As we were not able to find any existing guidance to objectively assess the extent of plagiarism, we  
20 developed a framework based on suggestions from COPE<sup>2</sup> and Wager (2008),<sup>3</sup> that propose  
21 differentiating between clear plagiarism and minor copying of someone else's (plagiarism) and one's  
22 own text (redundancy). We assessed the extent of plagiarism and stratified by which section of the  
23 research paper it appeared in.

24  
25 We identified copied sentences from the similarity reports. Sentences had to be substantially or  
26 completely copied. When a sentence had been clearly copied and prefixed by "However" or  
27 "Researchers found that..." this was classed as copying; and where plagiarised strings of sentences  
28 were detected joined together with conjunctions this was classed as copying (Supplementary file 2).  
29 Once we identified a copied sentence, we checked the source of the original sentence, as stated in  
30 the similarity report. If the source of the original sentence contained one or more of the authors of  
31 the article under investigation, we classified it as redundancy, whereas if the source of the original  
32 sentence was from other authors, we classified it as plagiarism.

33  
34 For each section of the article, we counted the number of copied sentences and assigned one of  
35 three levels, depending on the number of copied sentences (Table 1). We then assigned an overall  
36 plagiarism category, using the same criteria for each section of the article, to describe the extent of  
37 plagiarism, namely "some", "moderate", or "extensive" plagiarism (Table 1). As methods copying  
38 was common, and can happen when people are using standard methods, we adjusted the definition  
39 to take this into account. Overall redundancy was scored in an equivalent way and for each article  
40 separate scores were given for plagiarism and redundancy.

41  
42 Development of the framework was an iterative process, and piloted by AR and EW who  
43 independently assessed similarity reports of 10 articles and discussed results with the entire  
44 research team. Once the team had agreed on the framework, one author (AR) scored all similarity  
45 reports using the framework and another author (EW) independently scored a random selection of  
46 10% of reports. Any disagreements in rating were resolved by consensus.

Table 1: Plagiarism framework

|                      | Number of copied sentences detected                                                                        |                                                                                                              |                                                                                                                 |
|----------------------|------------------------------------------------------------------------------------------------------------|--------------------------------------------------------------------------------------------------------------|-----------------------------------------------------------------------------------------------------------------|
|                      | Level 1                                                                                                    | Level 2                                                                                                      | Level 3                                                                                                         |
| Abstract             | 1 to 2                                                                                                     | 3 to 6                                                                                                       | 6+; or 4 + linked                                                                                               |
| Background           | 1 to 2                                                                                                     | 3 to 6                                                                                                       | 6+; or 4 + linked                                                                                               |
| Methods              | 1 to 2                                                                                                     | 3 to 6                                                                                                       | 6+; or 4 + linked                                                                                               |
| Results              | 1 to 2                                                                                                     | 3 to 6                                                                                                       | 6+; or 4 + linked                                                                                               |
| Discussion           | 1 to 2                                                                                                     | 3 to 6                                                                                                       | 6+; or 4 + linked                                                                                               |
| <b>Overall score</b> | <b>Some plagiarism</b>                                                                                     | <b>Moderate plagiarism</b>                                                                                   | <b>Extensive plagiarism</b>                                                                                     |
| <b>Definition</b>    | One or more sections with plagiarism of one to two sentences; or level 2 plagiarism in the methods section | One or more sections with plagiarism of three to six sentences; or level 3 plagiarism in the methods section | One or more sections with plagiarism of four or more linked sentences, or plagiarism of more than six sentences |

## Data analysis

We used SPSS (version 25)<sup>16</sup> for analysis and report categorical data as frequencies and proportions and continuous data as medians, means and standard deviations, or modes and ranges. As this study aimed to generate rather than test hypotheses, we did not test statistical significance between categories. For plagiarism and redundancy, we calculated 95% confidence intervals (CI), adjusted for clustering at the journal level using robust standard errors, with STATA (version 15).<sup>17</sup>

## Ethical issues

All data used in this study was available online and is thus in the public domain. To ensure anonymity of authors, we did not include information identifying individual research articles in our report. We obtained an ethics exemption from the Stellenbosch University Health Research Ethics Committee (X17/08/010). Where we detected serious plagiarism in published papers, we identified the journal editors and are currently writing to them, informing them of our findings.

## Results

Of the 179 biomedical journals indexed on AJOL, 100 met the eligibility criteria and were included in the study (Figure 1). Detailed characteristics of journals are reported in the table of included journals (Supplementary file 3), while excluded journals are listed in the table of excluded journals (Supplementary file 4).

We selected five original research articles published in the 2016 issue of each journal. Some had not published this number (one journal only published two research articles, and two journals published four research articles). For these we included all research articles published in 2016, giving a total of 495 research articles included (Figure 1).

### Plagiarism policies in included journals

Twenty six percent of the journals had a policy on plagiarism mentioned on their website (Table 2). More journals with open (35%) compared to paid (6%) access and more specialised (38%) compared to general (13%) journals mentioned a policy. Journals with a plagiarism policy included both those from non-commercial (22%) and commercial (32%) publishers. Journals with the same commercial publisher generally had similar policies. All journals published by 'AOSIS publications' or 'Health and Medical Publishing Group' had a policy and referred to text-matching software. None of the journals published by 'Medknow publications' (19 journals) and 'In House publications' (2 journals) mentioned a policy. For 'Medpharm publications', three of the four journals had a plagiarism policy,

but only one of these also referred to text-matching software. Of the nine journals with an impact factor, three did not have a policy on plagiarism and six of the seven AJPP member journals had no policy.

Only 16 journals said they used text-matching software to check for plagiarism, of these, there were more journals from commercial (24%) than non-commercial publishers (10%); more journals with open (20%) than paid access (3%); and more specialised (25%) than general (6%) journals (Table 2).

Table 2: Plagiarism policies in included journals (n=100)

|                                                                                                                                                                                                                                                                                                                                                                                                                                                                                                                                               | Publisher                       |                                          | Access             |                    | Scope          |                    | Total (n=100) |
|-----------------------------------------------------------------------------------------------------------------------------------------------------------------------------------------------------------------------------------------------------------------------------------------------------------------------------------------------------------------------------------------------------------------------------------------------------------------------------------------------------------------------------------------------|---------------------------------|------------------------------------------|--------------------|--------------------|----------------|--------------------|---------------|
|                                                                                                                                                                                                                                                                                                                                                                                                                                                                                                                                               | Non-commercial publisher (n=59) | Commercial publisher <sup>1</sup> (n=41) | Open access (n=69) | Paid access (n=31) | General (n=48) | Specialised (n=52) |               |
| Plagiarism policy available                                                                                                                                                                                                                                                                                                                                                                                                                                                                                                                   | 13 (22%)                        | 13 (32%)                                 | 24 (35%)           | 2 (6%)             | 6 (13%)        | 20 (38%)           | 26            |
| Definition of plagiarism                                                                                                                                                                                                                                                                                                                                                                                                                                                                                                                      | 5 (8%)                          | 9 (22%)                                  | 13 (19%)           | 1 (3%)             | 2 (4%)         | 12 (23%)           | 14            |
| Reference to plagiarism software                                                                                                                                                                                                                                                                                                                                                                                                                                                                                                              | 6 (10%)                         | 10 (24%)                                 | 14 (20%)           | 2 (6%)             | 3 (6%)         | 13 (25%)           | 16            |
| Consequences of plagiarism described                                                                                                                                                                                                                                                                                                                                                                                                                                                                                                          | 11 (19%)                        | 10 (24%)                                 | 20 (29%)           | 1 (3%)             | 6 (13%)        | 15 (29%)           | 21            |
| Reference to COPE flowchart                                                                                                                                                                                                                                                                                                                                                                                                                                                                                                                   | 2 (3%)                          | 2 (5%)                                   | 3 (4%)             | 1 (3%)             | 0              | 4 (8%)             | 4             |
| <sup>1</sup> Medknow Publications, based in India (19 journals); Health & Medical Publishing group (6 journals), Medpharm Publications (4 journals), AOSIS Publishing (3 journals) In House publications (2 journals) and LAM publications limited (1 journal), all based in South Africa; Bookbuilders Africa (1 journal), Michael Joanna Publications (1 journal), Fine Print and Manufacturers (1 journal), CME ventures (1 journal) and SAME ventures (1 journal) based in Nigeria; and AKS publications (1 journal), based in Mauritius. |                                 |                                          |                    |                    |                |                    |               |

### Characteristics of included research articles (n=495)

Characteristics of included research articles are summarised in Table 3. Most articles were published in open-access journals (69%), and about half (48%) in a journal with a general scope; 41% were published in journals from a commercial publisher. Non-commercial publishers included research institutions and academic organizations that published their journals themselves.

Nine journals had an impact factor, and accounted for 9% of the papers included, and seven journals were members of the AJPP (7% of research articles). Articles had a median of three authors (min 1, max 10). Overall, half of the included articles had corresponding authors based in Nigeria. Half (50%) of the included articles represented cross-sectional studies.

Table 3: Summary of characteristics of included articles (n=495)

| Characteristic                    | n (%)     |
|-----------------------------------|-----------|
| <b>Published in journal with:</b> |           |
| Impact factor                     | 45 (9%)   |
| Open access                       | 342 (69%) |



|                                        |           |
|----------------------------------------|-----------|
| <b>General scope</b>                   | 239 (48%) |
| <b>Commercial publisher</b>            | 205 (41%) |
| <b>AJJP membership</b>                 | 35 (7%)   |
| <b>Country of corresponding author</b> |           |
| <b>Nigeria</b>                         | 250 (51%) |
| <b>South Africa</b>                    | 83 (17%)  |
| <b>Other African country</b>           | 99 (20%)  |
| <b>Non-African country</b>             | 63 (13%)  |
| <b>Type of study</b>                   |           |
| <b>Cross-sectional study</b>           | 247 (50%) |
| <b>Retrospective study</b>             | 65 (13%)  |
| <b>Case Report</b>                     | 42 (9%)   |
| <b>Trial</b>                           | 36 (7%)   |
| <b>Cohort study</b>                    | 22 (4%)   |
| <b>Review</b>                          | 21 (4%)   |
| <b>Case-control study</b>              | 12 (2%)   |
| <b>Other</b>                           | 50 (10%)  |

#### Overall similarity index (OSI) of included articles

The OSI's for all included articles are reported in Table 4. Of all included papers, 90% had an OSI of 30% or less. All five articles with an OSI of 50% or more were published in non-commercial journals.

Table 4: OSI's of included articles (n=495)

| OSI        | Number of articles (%) |
|------------|------------------------|
| 0 to 10%   | 137 (28)               |
| 11 to 20%  | 202 (41)               |
| 21 to 30%  | 104 (21)               |
| 31 to 40%  | 34 (7%)                |
| 41 to 50%  | 13 (3)                 |
| 51 to 60%  | 2 (0.4)                |
| 61 to 70%  | 3 (0.6)                |
| 71 to 100% | 0                      |

#### Rates and extent of plagiarism and redundancy per section of article

The presence of plagiarism varied across different sections of the articles (Supplementary file 5). We did not find widespread plagiarism or redundancy in the results sections of included articles. Plagiarism was mostly in the introduction of articles (47%) followed by the discussion (39%) and the methods section (30%). The extent of plagiarism also varied across sections, and plagiarism of one to two sentences occurred most commonly. Plagiarism in the introduction comprised one to two copied sentences in 23% of articles, three to six copied discrete sentences in 14% and at least four linked or more than six discrete copied sentences in 11% of articles. In the discussion section, plagiarism comprised one to two copied sentences in 18% of articles, three to six copied sentences in 13% and at least four linked or more than six discrete copied sentences in 9% of articles.

Redundancy was mostly seen in the methods section of included articles (11%), comprising one to two copied sentences in 3% of articles, three to six copied sentences in 4% and at least four linked or more than six discrete copied sentences in 3% of articles (Supplementary file 5).

### Overall plagiarism in included articles

We found plagiarism (any level) in 63% articles, comprising some plagiarism in 27%, moderate plagiarism in 19% and extensive plagiarism in 17% of articles (Table 5).

Table 5: Overall plagiarism (n=495)

| Plagiarism score                      | Definition                                                                                                               | n   | % (95 CI)       |
|---------------------------------------|--------------------------------------------------------------------------------------------------------------------------|-----|-----------------|
| <b>Any level of plagiarism</b>        | At least one or more sections with plagiarism of one to two sentences; or level 2 plagiarism in the methods section      | 313 | 63% (58 to 68%) |
| <b>Some plagiarism (Level 1)</b>      | One or more sections with plagiarism of one to two sentences;                                                            | 134 | 27% (23 to 32%) |
| <b>Moderate plagiarism (Level 2)</b>  | One or more sections with plagiarism of three to six sentences; or level 3 plagiarism in the methods section             | 96  | 19% (16 to 23%) |
| <b>Extensive plagiarism (Level 3)</b> | One or more sections with plagiarism of four or more linked sentences, or plagiarism of more than six separate sentences | 83  | 17% (13 to 21%) |

We explored the characteristics of articles with plagiarism (Supplementary file 6). The most important factor that appeared to influence plagiarism was whether the journal referred to text-matching software or not. Of all included articles published in a journal that did not refer to text-matching software, 67% contained any level of plagiarism and 19% had extensive plagiarism; while 43% of articles published in a journal with reference to text-matching software had any level of plagiarism and 6% had extensive plagiarism. Having a policy only (without reference to text-matching software) did not appear to influence plagiarism. The most striking finding in terms of type of study was linked to reviews. Although the proportion of reviews with any plagiarism was comparable to other study designs, almost half of all included reviews (48%) had extensive plagiarism.

Redundancy was less common than plagiarism. Overall, 11% of articles had any level of redundancy, comprising 4% of articles with some redundancy, 4% with moderate redundancy and 2% with extensive redundancy (Table 6).

Table 6: Overall redundancy (n=495)

| Redundancy score                     | Definition                                                                                                          | n  | % (95 CI)      |
|--------------------------------------|---------------------------------------------------------------------------------------------------------------------|----|----------------|
| <b>Any level of redundancy</b>       | At least one or more sections with redundancy of one to two sentences; or level 2 redundancy in the methods section | 54 | 11% (8 to 15%) |
| <b>Some redundancy (Level 1)</b>     | One or more sections with redundancy of one to two sentences; or level 2 redundancy in the methods section          | 21 | 4% (3 to 7%)   |
| <b>Moderate redundancy (Level 2)</b> | One or more sections with redundancy of three to six sentences; or level 3 redundancy in the methods section        | 22 | 4% (3 to 7%)   |
| <b>Extensive redundancy</b>          | One or more sections with redundancy of                                                                             | 11 | 2% (1 to 4%)   |

|           |                                                                         |  |  |
|-----------|-------------------------------------------------------------------------|--|--|
| (Level 3) | four or more linked sentences, or redundancy of more than six sentences |  |  |
|-----------|-------------------------------------------------------------------------|--|--|

### Accuracy of various OSI thresholds

We explored the accuracy of various thresholds of OSI's according to our plagiarism framework (Table 7). With an OSI threshold of 5%, sensitivity was high, meaning that 97% of articles with any level of plagiarism were correctly identified as such and only 3% of articles with any level of plagiarism were missed. However, specificity was low, meaning only 17% of articles without any plagiarism were correctly identified as such and the rate of false positives was high (83%). Increasing the threshold led to a decreased sensitivity and increased specificity.

Table 7: Sensitivity and specificity of various OSI thresholds

| OSI threshold | Sensitivity | Specificity |
|---------------|-------------|-------------|
| OSI >5%       | 97%         | 17%         |
| OSI >10%      | 84%         | 51%         |
| OSI >15%      | 66%         | 83%         |

## Discussion

Our study is the first to explore actual levels of plagiarism in biomedical journals from Africa. We proposed a framework to measure plagiarism, as an OSI generated by text-matching software on its own is not sufficient to describe the presence and extent of copied text. Indeed, the OSI is only an indication of the proportion (%) of copied text and there is no consensus of an acceptable threshold. In our sample, the sensitivity for an OSI threshold of 10% was 84%, compared to 97% for a threshold of 5%. Taylor and colleagues found an even lower sensitivity of 67% for an OSI threshold of 11.5%, excluding citations and references.<sup>18</sup> Zhang (2010) used text-matching software to screen manuscripts submitted to a Chinese journal for plagiarism<sup>19</sup> and found that 23% contained high levels of plagiarism, although it is not clear how plagiarism was defined. A study from Pakistan that assessed plagiarism of submitted manuscripts<sup>20</sup> found that 39% of papers contained plagiarised text, defined as the presence of one or more copied sentences. They reported similar results for papers from Turkey and China. In our sample, 72% of articles had an OSI above 10%, and 63% (95% CI 58 to 68%) had any level of plagiarism according to our framework, a much higher rate compared to the findings of other studies.

In line with recommendations for best practices,<sup>5 10 21</sup> more and more journal editors and publishers make use of text-matching software to screen submitted manuscripts for copied text.<sup>22</sup> But, software licences are expensive and some smaller journals, especially institutional journals and those with non-commercial publishers, may not be able to afford them.<sup>23</sup> Indeed, we found that of the 26% of journals that had a policy of plagiarism, most were from commercial publishers. In addition, only 16% of journals mentioned the use of text-matching software.

Our framework is limited in that it only measures plagiarism in terms of number of copied sentences, although it does take into account where in the article the copied text was found. We considered plagiarism in the methods section to be less serious than plagiarism in other sections of the articles, as it is sometime difficult to avoid repeating standard descriptions of methods. It does however, not consider other aspects of plagiarism, such as how the text was referenced and whether plagiarism was intentional or not,<sup>3</sup> which are important aspects to consider when making judgements about plagiarism. It is also limited to plagiarism of text and does not take into account plagiarism of data or images (which is also a limitation of text-matching software). To test our framework, one author (AR) checked all the articles, and another author (EW) checked a random sample of 10% of articles. While our scores for overall plagiarism were mostly consistent we found that variations depended on how we scored borderline cases in terms of what was considered a

1  
2  
3 completely copied sentence. The framework therefore may lack precision in terms of interrater  
4 reliability and test-retest reliability and needs further testing. However, we found that the  
5 framework was still a useful tool which facilitated assessment across articles and represented the  
6 extent of plagiarism well.

7  
8 We were interested in regional journals and wanted to examine smaller and non-mainstream  
9 journals based in Africa. We considered various sampling frames, but few met our requirements. We  
10 chose AJOL to sample journals, as it hosts over 500 journals, including 179 biomedical journals, from  
11 over 30 African countries. In light of the known challenges in identifying African biomedical  
12 journals,<sup>24 25</sup> we thus considered AJOL to be a comprehensive and pragmatic sampling frame,  
13 although it does not represent all African biomedical journals.

14  
15 The need to build capacity of African journals to improve the quality and visibility of African research  
16 has previously been recognised. In an attempt to address this need, the AJPP was initiated in  
17 2004.<sup>25,11</sup> In addition to building capacity of specific member journals, the project has also envisaged  
18 that the African members become “regional leaders and share their acquired knowledge and  
19 experience with other editors and journals on the continent”.<sup>25</sup> Although only seven of our included  
20 journals were members of AJPP, the proportion of articles with any level of plagiarism was the same  
21 for member and non-member journals. Only one of the seven AJPP member journals mentioned a  
22 policy on plagiarism. It is possible that journals had plagiarism policies but did not mention them on  
23 their online information; however, given the actual amount of plagiarism we found, we think this is  
24 unlikely, and since one purpose of such policies is to act as a deterrent we believe they should be  
25 clearly publicised by journals.

26  
27 The level of plagiarism in African biomedical journals is concerning. African journals should aim to  
28 meet global expectations and follow best practices with regards to their policies and guidelines on  
29 plagiarism. This includes using text-matching software to detect plagiarism in submitted  
30 manuscripts. Not only will this help to verify originality of submitted work, but it also has the  
31 potential to deter poor practices. However, although text-matching software is a useful screening  
32 tool, editors should not rely on the OSI on its own. A high similarity score should trigger detailed  
33 assessment by a knowledgeable editor, but the possibility of false positives and false negatives  
34 should always be borne in mind. Our plagiarism framework provides an approach to classify the  
35 extent of plagiarism. Further testing of the tool is necessary to determine validity and reliability.

## 36 37 Acknowledgements

38 We would like to thank Selvan Naidoo and Traci Naidoo for their assistance in eligibility assessment  
39 of journals and Tonya Esterhuizen for statistical support.

40  
41 Anke Rohwer conducted this research as part of her PhD at Stellenbosch University, South Africa.

42  
43 All authors are supported by the Effective Health Care Research Consortium. This Consortium is  
44 funded by UK aid from the UK Government for the benefit of developing countries (Grant: 5242).  
45 The views expressed in this publication do not necessarily reflect UK government policy.

## 46 47 Contributions of authors

48 All authors contributed to the design of the study and the development of the plagiarism  
49 framework. AR collected and analysed data from journals and articles with input from TY, PG, and  
50 EW. AR reviewed all manuscripts using the plagiarism framework and EW independently reviewed  
51 10% of included articles. AR drafted the manuscript. TY, PG and EW critically engaged with the  
52 manuscript and provided input. All authors approved the final version of the manuscript.

## Competing interests

Paul Garner is part of Cochrane, an organization that routinely uses Turnitin. Elizabeth Wager has given workshops on plagiarism and spoken at a conference funded by Turnitin. Anke Rohwer and Taryn Young do not have any known conflicts of interest.

## Data sharing

Unpublished data from the study is available upon request from AR.

## References

1. Steneck N. ORI Introduction to the responsible conduct of research. 2007. Available from: <https://ori.hhs.gov/ori-introduction-responsible-conduct-research>
2. Committee on Publication Ethics (COPE). What to do if you suspect plagiarism 2013 [Available from: <http://publicationethics.org/files/plagiarism%20B.pdf>.
3. Wager E. Defining and responding to plagiarism. *Learned Publishing* 2014;27(1):33-42. doi: 10.1087/20140105
4. Roig M. Avoiding plagiarism, self-plagiarism, and other questionable writing practices: A guide to ethical writing, 2006.
5. World Association of Medical Editors (WAME). Recommendations on Publication Ethics Policies for Medical Journals: WAME; 2017 [Available from: <http://www.wame.org/about/recommendations-on-publication-ethics-policie> accessed 8 August 2017.
6. Steneck NH, Bulger RE. The history, purpose, and future of instruction in the responsible conduct of research. *Academic medicine : journal of the Association of American Medical Colleges* 2007;82(9):829-34. doi: 10.1097/ACM.0b013e31812f7d4d
7. Anderson MS. Global research integrity in relation to the United States' research-integrity infrastructure. *Account Res* 2014;21(1):1-8. doi: 10.1080/08989621.2013.822262
8. Rohwer A, Young T, Wager E, et al. Authorship, plagiarism and conflict of interest: views and practices from low/middle-income country health researchers. *BMJ open* 2017;7(11):e018467. doi: 10.1136/bmjopen-2017-018467
9. Forum NE. Scientific African, an open access multi-disciplinary journal to boost the global reach of research from Africa. Kigali, Rwanda, 2018.
10. Committee on Publication Ethics (COPE). Code of conduct and best practice guidelines for journal editors 2011 [updated Accessed on 2 February 2017. Available from: [http://publicationethics.org/files/Code\\_of\\_conduct\\_for\\_journal\\_editors\\_Mar11.pdf](http://publicationethics.org/files/Code_of_conduct_for_journal_editors_Mar11.pdf).
11. African Journal Partnership Project (AJPP). 2016 [Available from: <https://ajpp-online.org/>.
12. Pupovac V, Fanelli D. Scientists Admitting to Plagiarism: A Meta-analysis of Surveys. *Science and engineering ethics* 2014 doi: 10.1007/s11948-014-9600-6
13. Fisher RJ, Katz JE. Social-desirability bias and the validity of self-reported values. *Psychology & Marketing* 2000;17(2):105-20.
14. Bank W. World Bank list of economies 2016 [Available from: [Siteresources.worldbank.org/DATASTATISTICS/Resources/CLASS.XLS](http://siteresources.worldbank.org/DATASTATISTICS/Resources/CLASS.XLS)
15. Turnitin. Turnitin Instructor QuickStart guide [Available from: [https://guides.turnitin.com/01\\_Manuals\\_and\\_Guides/Instructor\\_Guides/01\\_Instructor\\_QuickStart\\_Guide#Evaluating\\_Originality\\_Reports](https://guides.turnitin.com/01_Manuals_and_Guides/Instructor_Guides/01_Instructor_QuickStart_Guide#Evaluating_Originality_Reports) accessed 14 February 2017.
16. IBM SPSS Statistics for Windows [program]. 25 version. Armonk, NY, 2017.
17. Stata Statistical Software [program]. 15 version. College Station, TX: StataCorp LLC 2017.

18. Taylor DB. Plagiarism in Manuscripts Submitted to the AJR: Development of an Optimal Screening Algorithm and Management Pathways. *AJR Am J Roentgenol* 2017;209(1):W56. doi: 10.2214/AJR.17.18078
19. Zhang HY. CrossCheck: an effective tool for detecting plagiarism. *Learned Publishing* 2010;23(1):9-14. doi: 10.1087/20100103
20. Jamali R, Ghazinoory S, Sadeghi M. Plagiarism and ethics of knowledge. *Journal of Information Ethics* 2014;23(1):101-10. doi: 10.3172/jie.23.1.101
21. Kleinert S, Wager E. Responsible research publication: international standards for editors. A position statement developed at the 2nd World Conference on Research Integrity, Singapore, July 22-24, 2010. In: Mayer T, Steneck N, eds. Promoting Research Integrity in a Global Environment. Singapore: Imperial College Press/World Scientific Publishing 2011:317-28.
22. Kleinert S. Checking for plagiarism, duplicate publication, and text recycling. *The Lancet* 2011;377(9762):281-82. doi: 10.1016/s0140-6736(11)60075-5
23. Gasparyan AY, Nurmashev B, Seksenbayev B, et al. Plagiarism in the Context of Education and Evolving Detection Strategies. *J Korean Med Sci* 2017;32(8):1220-27. doi: 10.3346/jkms.2017.32.8.1220
24. Siegfried N, Busgeeth K, Certain E. Scope and geographical distribution of African medical journals active in 2005. *S Afr Med J* 2006;96(6):533-8.
25. Goehl TJ, Flanagan A. Enhancing the quality and visibility of African medical and health journals. *Environ Health Perspect* 2008;116(12):A514-5. doi: 10.1289/ehp.12265

## Figures

Figure 1: Flow diagram of included journals and research articles

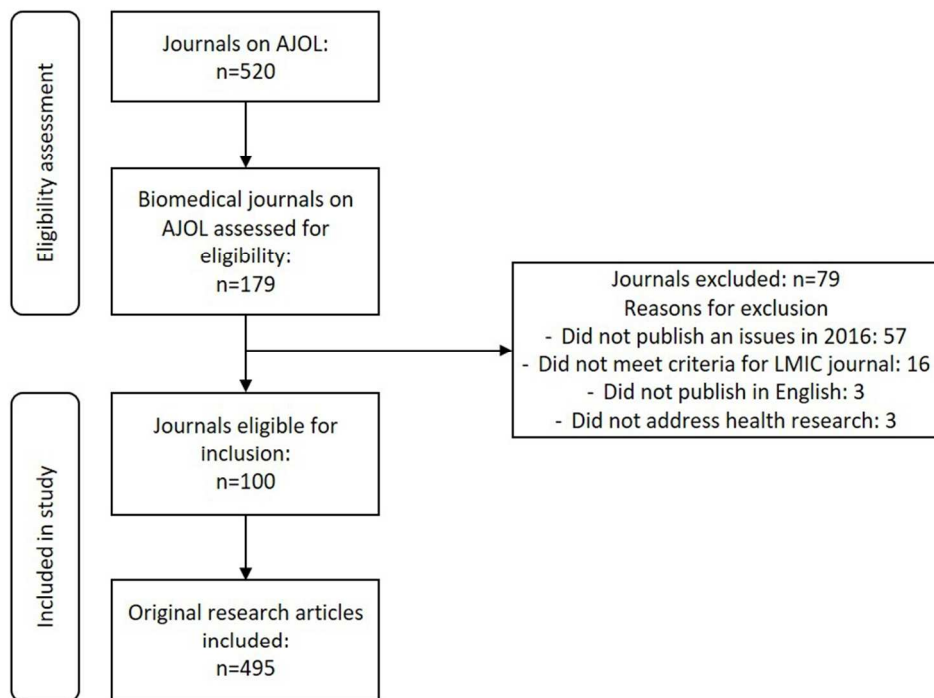

32 Figure 1: Flow diagram of included journals and research articles

33 165x129mm (150 x 150 DPI)



## Supplementary file 1: Data extraction forms

## 1.1 Data extraction form for journal policies and guidelines

| <b>General information</b>                                       |     |           |
|------------------------------------------------------------------|-----|-----------|
| Journal name                                                     |     |           |
| Website                                                          |     |           |
| Scope                                                            |     |           |
| Publisher                                                        |     |           |
| Country where publisher is based                                 |     |           |
| Country where editor in chief is based                           |     |           |
| LMIC journal?                                                    | Yes |           |
|                                                                  | No  |           |
| Impact factor                                                    | Yes |           |
|                                                                  | No  |           |
| Publication frequency                                            |     |           |
| Open access                                                      | Yes |           |
|                                                                  | No  |           |
| Scope general?                                                   | Yes |           |
|                                                                  | No  |           |
| <b>Plagiarism</b>                                                |     |           |
| Policy available                                                 | Yes |           |
|                                                                  | No  |           |
| Description on what constitutes plagiarism?                      | Yes | Describe: |
|                                                                  | No  |           |
| Reference to plagiarism software?                                | Yes |           |
|                                                                  | No  |           |
| Consequences of plagiarism described?                            | Yes | Describe: |
|                                                                  | No  |           |
| Reference to COPE flow-diagram?                                  | Yes |           |
|                                                                  | No  |           |
| <b>Authorship</b>                                                |     |           |
| Guideline available                                              | Yes | Describe: |
|                                                                  | No  |           |
| Guideline in line with updated ICMJE criteria (i.e. 4 criteria)? | Yes |           |
|                                                                  | No  |           |
| Guideline in line with old ICMJE criteria (i.e. 3 criteria)?     | Yes |           |
|                                                                  | No  |           |
| Contributorship policy                                           | Yes | Describe: |
|                                                                  | No  |           |
| Information on acknowledgement practices                         | Yes | Describe  |
|                                                                  | No  |           |
| <b>Conflict of interest</b>                                      |     |           |
| Guideline available                                              | Yes |           |
|                                                                  | No  |           |



|                                        |     |          |
|----------------------------------------|-----|----------|
| Definition of a conflict of interest   | Yes | Describe |
|                                        | No  |          |
| Guidance on what to declare            | Yes |          |
|                                        | No  |          |
| <b>Funding sources</b>                 |     |          |
| Guideline available                    | Yes |          |
|                                        | No  |          |
| Information on what to declare         | Yes | Describe |
|                                        | No  |          |
| Guidance on how to declare funding     | Yes | Describe |
|                                        | No  |          |
| Funding statement in publication       | Yes |          |
|                                        | No  |          |
| <b>ICMJE</b>                           |     |          |
| Do they mention ICMJE recommendations? | Yes |          |
|                                        | No  |          |
| Is there a link to the ICMJE website?  | Yes |          |
|                                        | No  |          |
| Is there a link to the ICMJE document? | Yes |          |
|                                        | No  |          |
| Notes                                  |     |          |

## 1.2 Data extraction form for all research articles

|                                                                   |     |                                                                    |
|-------------------------------------------------------------------|-----|--------------------------------------------------------------------|
| <b>General information</b>                                        |     |                                                                    |
| Study ID                                                          |     |                                                                    |
| Type of study                                                     |     |                                                                    |
| Number of authors                                                 |     |                                                                    |
| Country of contact author                                         |     |                                                                    |
| <b>Authorship</b>                                                 |     |                                                                    |
| Did authors disclose contributions of authors?                    | Yes | Describe                                                           |
|                                                                   | No  |                                                                    |
| For each author: Which ICMJE criteria are met?                    | Yes |                                                                    |
|                                                                   | No  |                                                                    |
| Are any other contributors listed in the acknowledgement section? | Yes | Describe                                                           |
|                                                                   | No  |                                                                    |
| <b>Conflicts of interest</b>                                      |     |                                                                    |
| Did authors declare conflicts of interest                         | Yes | None known                                                         |
|                                                                   |     | Financial conflicts of interest                                    |
|                                                                   |     | Non-financial conflicts of interest                                |
| No                                                                |     |                                                                    |
| <b>Funding sources</b>                                            |     |                                                                    |
| Did authors disclose funding sources?                             | Yes | Commercial funding                                                 |
|                                                                   |     | Non-commercial external funding e.g. grants, NPOs, private funders |
|                                                                   |     | No external funding                                                |
| No                                                                |     |                                                                    |
| <b>Plagiarism</b>                                                 |     |                                                                    |
| Turnitin similarity score                                         |     |                                                                    |

|               |            |          |
|---------------|------------|----------|
| Score >10%?   | Yes        |          |
|               | No         |          |
| No plagiarism | Yes        |          |
|               | No         |          |
| Abstract      | Plagiarism | Level 1  |
|               |            | Level 2  |
|               |            | Level3   |
|               | Redundancy | Level 1  |
|               |            | Level 2  |
|               |            | Level3   |
| Introduction  | Plagiarism | Level 1  |
|               |            | Level 2  |
|               |            | Level3   |
|               | Redundancy | Level 1  |
|               |            | Level 2  |
|               |            | Level3   |
| Methods       | Plagiarism | Level 1  |
|               |            | Level 2  |
|               |            | Level3   |
|               | Redundancy | Level 1  |
|               |            | Level 2  |
|               |            | Level3   |
| Results       | Plagiarism | Level 1  |
|               |            | Level 2  |
|               |            | Level3   |
|               | Redundancy | Level 1  |
|               |            | Level 2  |
|               |            | Level3   |
| Discussion    | Plagiarism | Level 1  |
|               |            | Level 2  |
|               |            | Level3   |
|               | Redundancy | Level 1  |
|               |            | Level 2  |
|               |            | Level3   |
| Overall       | Plagiarism | Mild     |
|               |            | Moderate |
|               |            | Severe   |
|               | Redundancy | Mild     |
|               |            | Moderate |
|               |            | Severe   |
| Notes         |            |          |

1  
2  
3  
4  
5  
6  
7  
8  
9  
10  
11  
12  
13  
14  
15  
16  
17  
18  
19  
20  
21  
22  
23  
24  
25  
26  
27  
28  
29  
30  
31  
32  
33  
34  
35  
36  
37  
38  
39  
40  
41  
42  
43  
44  
45  
46  
47  
48  
49  
50  
51  
52  
53  
54  
55  
56  
57  
58  
59  
60

For peer review only

1  
2  
3 **Supplementary file 2: Dummy OSI report generated by Turnitin**  
4  
5

6 We submitted a dummy text linked to our own work to Turnitin, that generated an OSI report. In this hypothetical example,  
7 we demonstrate how we counted copied sentences.  
8  
9  
10  
11  
12  
13  
14  
15  
16  
17  
18  
19  
20  
21  
22  
23  
24  
25  
26  
27  
28  
29  
30  
31  
32  
33  
34  
35  
36  
37  
38  
39  
40  
41  
42  
43  
44  
45  
46  
47  
48  
49  
50  
51  
52  
53  
54  
55  
56  
57  
58  
59  
60

For peer review only

1

2  
3  
4  
5  
6  
7  
8  
9  
10  
11  
12  
13  
14  
15  
16  
17  
18  
19  
20  
21  
22  
23  
24  
25  
26  
27  
28  
29  
30  
31  
32  
33  
34  
35  
36  
37  
38  
39  
40  
41  
42  
43  
44  
45  
46  
47  
48  
49  
50  
51  
52  
53  
54  
55  
56  
57  
58  
59  
60

1  
There are few empirical studies on irresponsible research practices from low-and middle income countries (LMICs). Only one of the systematic reviews mentioned above [8] included studies conducted in LMICs – three of the 14 studies that contributed data to the meta-analysis. Published literature focuses on high-income countries and research misconduct in terms of data falsification, data fabrication and plagiarism [6, 9]. In LMICs research outputs are increasing (both locally and with international collaborations), national policies on research integrity are lacking [10] and the pressure to perform and live up to global standards is rising. In this context, adequate systems, processes and guidelines are needed to ensure ethical behaviour, address poor research reporting practices and promote research integrity [11]. Understanding researchers' perceptions of and experiences with good and poor reporting practices is key to inform activities that promote research integrity and further research in this field.

We counted 4 linked copied sentences in this paragraph

We developed and piloted an online questionnaire (Supplementary file 1). We created nine hypothetical scenarios related to guest authorship, ghost authorship, plagiarism, redundant publication and declaration of conflicts of interest. After each scenario, we asked participants to answer three questions in order to elicit responses on participants' understanding and occurrence of acceptable and unacceptable reporting practices. Questions followed a similar pattern for all scenarios. In addition, there was an opportunity to add free-text comments or clarifications after each scenario.

We did not count this sentence as being plagiarised

Results from the survey indicated that guest authorship is a common occurrence. Participants commented extensively on these scenarios, alluding to the relevance and complexity of the problem and providing some reasons for engaging in this practice. Results from the interviews mirrored those of the survey and provided further insight into the magnitude of the problem. Interviewees told many stories describing what happened at institutions and elaborated on the reasons already provided in the survey. Survey respondents thought that omitting an author who had made substantial contributions was unacceptable – yet, they indicated that this did occur at their institutions. Free-text comments on this practice showed that respondents had strong feelings about this, especially where they themselves had experienced omission from publications in the past. These feelings were echoed in the interviews and participants elaborated on the power play between junior and senior researchers. Indeed, this was one of the main themes that emerged from the data.

Survey respondents thought that plagiarism was unacceptable. Quantitative responses were underlined by free-text comments and respondents seemed to be very clear about this form of misconduct. Interviewees reiterated these views. They were very aware of the consequences of plagiarism, one interviewee appropriately saying: *"it's like doping in sports"*.

1  
2  
3  
4  
5  
6  
7  
8  
9  
10  
11  
12  
13  
14  
15  
16  
17  
18  
19  
20  
21  
22  
23  
24  
25  
26  
27  
28  
29  
30  
31  
32  
33  
34  
35  
36  
37  
38  
39  
40  
41  
42  
43  
44  
45  
46  
47  
48  
49  
50  
51  
52  
53  
54  
55  
56  
57  
58  
59  
60

1  
Of all the irresponsible practices explored, perceptions and occurrence of guest authorship stood out. In light of the availability of international guidelines [20] and journal requirements on contributions of authors, this result is striking although not unexpected when considering results of other studies. A meta-analysis on the misuse of authorship [8] found a self-reported prevalence of 55% (95%CI 45% to 64%) amongst health researchers from countries outside of the USA and UK, including South Africa, India and Bangladesh. A survey conducted amongst medical professionals in India [21] found a high prevalence of guest authorship (65%; 101/155), while in a study conducted in Nigeria, 36% (47/133) of participating health professionals indicated that they had encountered disagreements about authorship [22]. In our survey, 77% (153/198) of respondents indicated that guest authorship occurred at their institutions.

We counted 6 linked copied sentences in this paragraph

## Supplementary file 3: Characteristics of included journals

| Journal ID | Journal Name                                              | Publisher                                   | Type of publisher | Country      |                 | Scope       | Open access | First online issue | Impact Factor | Issues/year  | AJPP member | Member of COPE |           |
|------------|-----------------------------------------------------------|---------------------------------------------|-------------------|--------------|-----------------|-------------|-------------|--------------------|---------------|--------------|-------------|----------------|-----------|
|            |                                                           |                                             |                   | Publisher    | Editor-in-Chief |             |             |                    |               |              |             | Journal        | Publisher |
| AJOL_1     | African Health Sciences                                   | Faculty of Medicine, Makerere University    | Non-commercial    | Uganda       | Uganda          | General     | Yes         | 2001               | 0.642         | 4            | yes         | no             | no        |
| AJOL_2     | African Journal for Physical Activity and Health Sciences | LAM publications Limited                    | Commercial        | South Africa | South Africa    | General     | No          | 2002               | no            | 4            | no          | no             | no        |
| AJOL_3     | African Journal of Anaesthesia and Intensive Care         | Mirral Printing Press                       | Non-commercial    | Nigeria      | Nigeria         | Specialised | No          | 2008               | no            | 2            | no          | no             | no        |
| AJOL_4     | African Journal of Biomedical Research                    | Biomedical Communications Group             | Non-commercial    | Nigeria      | Nigeria         | General     | Yes         | 1999               | no            | 3            | no          | no             | no        |
| AJOL_5     | African Journal of Clinical and Experimental Microbiology | AJCEM Life line publishers                  | Non-commercial    | Nigeria      | Nigeria         | General     | Yes         | 2002               | no            | 3            | no          | no             | no        |
| AJOL_6     | African Journal of Drug and                               | African Centre for Research and Information | Non-commercial    | Nigeria      | Nigeria         | Specialised | Yes         | 2008               | no            | not reported | no          | no             | no        |

|         |                                                 |                                                                        |                |                                     |              |             |     |      |    |   |    |    |     |
|---------|-------------------------------------------------|------------------------------------------------------------------------|----------------|-------------------------------------|--------------|-------------|-----|------|----|---|----|----|-----|
|         | Alcohol Studies                                 | on Substance Abuse (CRISA)                                             |                |                                     |              |             |     |      |    |   |    |    |     |
| AJOL_7  | African Journal of Health Professions Education | Health and medical publishing group                                    | Commercial     | South Africa                        | South Africa | Specialised | Yes | 2009 | no | 2 | no | no | no  |
| AJOL_8  | African Journal of Health Sciences              | Kenya Medical Research Institute and African Forum for Health Sciences | Non-commercial | Kenya                               | Kenya        | General     | No  | 2002 | no | 4 | no | no | no  |
| AJOL_9  | African Journal of Infectious Disease           | Obafemi Awolowo University                                             | Non-commercial | Nigeria                             | Nigeria      | Specialised | Yes | 2007 | no | 2 | no | no | no  |
| AJOL_10 | African Journal of Paediatric Nephrology        | African Paediatric Nephrology Association (AFPNA)                      | Non-commercial | Nigeria                             | Nigeria      | Specialised | No  | 2014 | no | 2 | no | no | no  |
| AJOL_11 | African Journal of Paediatric Surgery           | Medknow Publications                                                   | Commercial     | India                               | Nigeria      | Specialised | Yes | 2004 | no | 2 | No | No | yes |
| AJOL_12 | African Journal of Reproductive Health          | Women's Health and Action Research Centre (WHARC)                      | Non-commercial | Nigeria                             | Nigeria      | Specialised | No  | 1999 | no | 4 | no | no | no  |
| AJOL_13 | African Journal of Rheumatology                 | African League of Associations for                                     | Non-commercial | Africa (regional offices in Africa) | South Africa | Specialised | No  | 2013 | no | 2 | no | no | no  |

|         |                                                                         |                                                          |                |          |          |             |     |      |       |               |     |    |     |
|---------|-------------------------------------------------------------------------|----------------------------------------------------------|----------------|----------|----------|-------------|-----|------|-------|---------------|-----|----|-----|
|         |                                                                         | Rheumatology (AFLAR)                                     |                |          |          |             |     |      |       |               |     |    |     |
| AJOL_14 | African Journal of Traditional, Complementary and Alternative Medicines | African Networks Ethnomedicines                          | Non-commercial | Nigeria  | Nigeria  | Specialised | No  | 2004 | 0.553 | 3             | no  | no | no  |
| AJOL_15 | Anatomy Journal of Africa                                               | Association of Anatomical Societies of Africa            | Non-commercial | Kenya    | Kenya    | Specialised | Yes | 2012 | no    | 2             | no  | no | no  |
| AJOL_16 | Annals of African Medicine                                              | Medknow Publications                                     | Commercial     | India    | Nigeria  | General     | Yes | 2002 | no    | 2             | no  | no | yes |
| AJOL_17 | Annals of African Surgery                                               | The Surgical Society of Kenya/Medics Management services | Non-commercial | Kenya    | Kenya    | Specialised | Yes | 2007 | no    | 2             | yes | no | no  |
| AJOL_18 | Annals of Ibadan Postgraduate Medicine                                  | Bookbuilders Africa                                      | Commercial     | Nigeria  | Nigeria  | General     | Yes | 2003 | no    | 2             | no  | no | no  |
| AJOL_19 | Annals of Medical and Health Sciences Research                          | Medknow Publications                                     | Commercial     | India    | Nigeria  | General     | Yes | 2011 | no    | not specified | no  | no | yes |
| AJOL_20 | Annals of Nigerian Medicine                                             | Medknow Publications                                     | Commercial     | India    | Nigeria  | General     | Yes | 2005 | no    | 2             | no  | no | yes |
| AJOL_21 | Central African                                                         | University of Zimbabwe                                   | Non-commercial | Zimbabwe | Zimbabwe | General     | No  | 1999 | no    | not specified | no  | no | no  |



|         |                                                            |                                                                                     |                |              |              |             |     |      |    |    |     |     |    |
|---------|------------------------------------------------------------|-------------------------------------------------------------------------------------|----------------|--------------|--------------|-------------|-----|------|----|----|-----|-----|----|
|         | Journal of Medicine                                        |                                                                                     |                |              |              |             |     |      |    |    |     |     |    |
| AJOL_22 | East African Medical Journal                               | Kenya Medical Association                                                           | Non-commercial | Kenya        | Kenya        | General     | No  | 1999 | no | 12 | no  | no  | no |
| AJOL_23 | East African Orthopaedic Journal                           | Kenya Orthopaedic Association                                                       | Non-commercial | Kenya        | Kenya        | Specialised | Yes | 2007 | no | 2  | no  | no  | no |
| AJOL_24 | East and Central African Journal of Surgery                | Association of Surgeons of East Africa/College of surgeons of East Africa (COSECSA) | Non-commercial | Tanzania     | Uganda       | Specialised | Yes | 1996 | no | 2  | no  | no  | no |
| AJOL_25 | Egyptian Journal of Pediatric Allergy and Immunology (The) | The Egyptian Society of Pediatric Allergy and Immunology                            | Non-commercial | Egypt        | Egypt        | Specialised | Yes | 2003 | no | 2  | no  | no  | no |
| AJOL_26 | Ergonomics SA                                              | Ergonomics Society of South Africa                                                  | Non-commercial | South Africa | South Africa | Specialised | No  | 2008 | no | 2  | no  | no  | no |
| AJOL_27 | Ethiopian Journal of Health Development                    | Ethiopian Public Health Society                                                     | Non-commercial | Ethiopia     | Ethiopia     | General     | Yes | 2000 | no | 3  | no  | no  | no |
| AJOL_28 | Ethiopian Journal of Health Sciences                       | Jimma University                                                                    | Non-commercial | Ethiopia     | Ethiopia     | General     | Yes | 1999 | no | 6  | yes | yes | no |
| AJOL_29 | Ghana Medical Journal                                      | Ghana Medical Association                                                           | Non-commercial | Ghana        | Ghana        | General     | Yes | 2004 | no | 4  | yes | yes | no |

|         |                                                                 |                                                                     |                |           |           |             |     |      |    |   |    |     |    |
|---------|-----------------------------------------------------------------|---------------------------------------------------------------------|----------------|-----------|-----------|-------------|-----|------|----|---|----|-----|----|
| AJOL_31 | Highland Medical Research Journal                               | Highland Medical Research Limited                                   | Non-commercial | Nigeria   | Nigeria   | General     | No  | 2002 | no | 2 | no | no  | no |
| AJOL_32 | IFE Psychologia                                                 | The Ife Center for Psychological Studies                            | Non-commercial | Nigeria   | Nigeria   | Specialised | No  | 1998 | no | 2 | no | no  | no |
| AJOL_33 | International Journal of Basic, Applied and Innovative Research | Antonio Research publications                                       | Non-commercial | Nigeria   | Nigeria   | General     | Yes | 2012 | no | 4 | no | no  | no |
| AJOL_34 | International Journal of Herbs and Pharmacological Research     | Antonio Research publications                                       | Non-commercial | Nigeria   | Nigeria   | Specialised | Yes | 2012 | no | 4 | no | no  | no |
| AJOL_35 | International Journal of Medicine and Biomedical Research       | Michael Joanna Publications                                         | Commercial     | Nigeria   | Nigeria   | General     | Yes | 2012 | no | 3 | no | yes | no |
| AJOL_36 | Internet Journal of Medical Update - EJOURNAL                   | AKS publication                                                     | Commercial     | Mauritius | Mauritius | General     | Yes | 2006 | no | 2 | no | no  | no |
| AJOL_37 | Jos Journal of Medicine                                         | Association of Resident Doctors of Jos University Teaching Hospital | Non-commercial | Nigeria   | Nigeria   | General     | Yes | 2009 | no | 3 | no | no  | no |

|         |                                                                   |                                                                           |                |              |              |             |     |      |    |               |    |    |     |
|---------|-------------------------------------------------------------------|---------------------------------------------------------------------------|----------------|--------------|--------------|-------------|-----|------|----|---------------|----|----|-----|
| AJOL_38 | Journal of Basic and Clinical Reproductive Sciences               | Nigerian Medical Association                                              | Non-commercial | Nigeria      | Nigeria      | Specialised | Yes | 2012 | no | 2             | no | no | no  |
| AJOL_40 | Journal of Community Medicine and Primary Health Care             | Association of Community Physicians of Nigeria                            | Non-commercial | Nigeria      | Nigeria      | Specialised | Yes | 2004 | no | 2             | no | no | no  |
| AJOL_41 | Journal of Endocrinology, Metabolism and Diabetes of South Africa | Medpharm Publications                                                     | Commercial     | South Africa | South Africa | Specialised | Yes | 2004 | no | 3             | no | no | no  |
| AJOL_42 | Journal of Experimental and Clinical Anatomy                      | Medknow Publications                                                      | Commercial     | India        | Nigeria      | Specialised | Yes | 2003 | no | 2             | no | no | yes |
| AJOL_43 | Journal of Medical and Biomedical Sciences                        | School of Medicine and Health Science, University for Development Studies | Non-commercial | Ghana        | Ghana        | General     | Yes | 2012 | no | not specified | no | no | no  |
| AJOL_44 | Journal of Medicine and Biomedical Research                       | Fine Print and Manufacturer Ltd                                           | Commercial     | Nigeria      | Nigeria      | General     | Yes | 2002 | no | 2             | no | no | no  |
| AJOL_45 | Journal of Medicine in the Tropics                                | Medknow Publications                                                      | Commercial     | India        | Nigeria      |             | Yes | 2002 | no | 2             | no | no | yes |
| AJOL_46 | Journal of Obstetrics and                                         | Kenya Obstetrical                                                         | Non-commercial | Kenya        | Kenya        | Specialised | No  | 2011 | no | 4             | no | no | no  |

|         |                                               |                                                                                       |                |         |         |         |     |      |       |    |     |     |     |
|---------|-----------------------------------------------|---------------------------------------------------------------------------------------|----------------|---------|---------|---------|-----|------|-------|----|-----|-----|-----|
|         | Gynaecology of Eastern and Central Africa     | and Gynaecological Society (KOGS)                                                     |                |         |         |         |     |      |       |    |     |     |     |
| AJOL_47 | Journal of Pharmaceutical and Allied Sciences | Department of Pharmaceutics University of Nigeria                                     | Non-commercial | Nigeria | Nigeria | General | No  | 2004 | no    | 2  | no  | yes | no  |
| AJOL_48 | Malawi Medical Journal                        | College of Medicine, University of Malawi and Medical Association of Malawi.          | Non-commercial | Malawi  | Malawi  | General | Yes | 1986 | 0.837 | 4  | yes | yes | no  |
| AJOL_49 | Medical Journal of Zambia                     | Zambia Medical Association                                                            | Non-commercial | Zambia  | Zambia  | General | Yes | 2008 | no    | 3  | no  | yes | no  |
| AJOL_50 | Nigerian Health Journal                       | Nigerian Medical Association                                                          | Non-commercial | Nigeria | Nigeria | General | Yes | 2008 | no    | 4  | no  | no  | no  |
| AJOL_51 | Nigerian Hospital Practice                    | CME Ventures                                                                          | Commercial     | Nigeria | Nigeria | General | No  | 2007 | no    | 24 | no  | no  | no  |
| AJOL_52 | Nigerian Journal of Clinical Medicine         | Association of Resident Doctors of the Lagos State University Teaching Hospital Ikeja | Non-commercial | Nigeria | Nigeria | General | No  | 2008 | no    | 2  | no  | no  | no  |
| AJOL_53 | Nigerian Journal of Clinical Practice         | Medknow Publications                                                                  | Commercial     | India   | Nigeria | General | Yes | 2001 | 0.524 | 6  | no  | no  | yes |

|         |                                                     |                                                                          |                |         |         |             |     |      |    |   |    |     |     |
|---------|-----------------------------------------------------|--------------------------------------------------------------------------|----------------|---------|---------|-------------|-----|------|----|---|----|-----|-----|
| AJOL_54 | Nigerian Journal of Family Practice                 | Society of Family Physicians of Nigeria. (SOFPON).                       | Non-commercial | Nigeria | Nigeria | Specialised | No  | 2012 | no | 2 | no | no  | no  |
| AJOL_55 | Nigerian Journal of Gastroenterology and Hepatology | Society for Gastroenterology & Hepatology                                | Non-commercial | Nigeria | Nigeria | Specialised | No  | 2009 | no | 4 | no | no  | no  |
| AJOL_56 | Nigerian Journal of General Practice                | Medknow Publications                                                     | Commercial     | India   | Nigeria | General     | Yes | 2011 | no | 2 | no | no  | yes |
| AJOL_57 | Nigerian Journal of Guidance and Counselling        | Department of Counsellor Education, University of Ilorin, Ilorin, Nigeri | Non-commercial | Nigeria | Nigeria | Specialised | No  | 1998 | no | 1 | no | no  | no  |
| AJOL_58 | Nigerian Journal of Medicine                        | University of Nigeria                                                    | Non-commercial | Nigeria | Nigeria | General     | No  | 2005 | no | 4 | no | no  | no  |
| AJOL_59 | Nigerian Journal of Natural Products and Medicine   | Nigerian Society of Pharmacognosy                                        | Non-commercial | Nigeria | Nigeria | Specialised | No  | 1997 | no | 1 | no | no  | no  |
| AJOL_60 | Nigerian Journal of Ophthalmology                   | Medknow Publications                                                     | Commercial     | India   | Nigeria | Specialised | Yes | 2000 | no | 2 | no | no  | yes |
| AJOL_61 | Nigerian Journal of Paediatrics                     | Paediatric Association of Nigeria                                        | Non-commercial | Nigeria | Nigeria | Specialised | Yes | 2001 | no | 4 | no | yes | no  |

|         |                                            |                                                   |                |         |         |             |     |      |    |    |    |    |     |
|---------|--------------------------------------------|---------------------------------------------------|----------------|---------|---------|-------------|-----|------|----|----|----|----|-----|
| AJOL_62 | Nigerian Journal of Parasitology           | Parasitology and Public Health Society of Nigeria | Non-commercial | Nigeria | Nigeria | Specialised | No  | 2000 | no | 2  | no | no | no  |
| AJOL_63 | Nigerian Journal of Physiological Sciences | Physiological Society of Nigeria                  | Non-commercial | Nigeria | Nigeria | Specialised | Yes | 2003 | no | 2  | no | no | no  |
| AJOL_64 | Nigerian Journal of Plastic Surgery        | Medknow Publications                              | Commercial     | India   | Nigeria | Specialised | Yes | 2006 | no | 2  | no | no | yes |
| AJOL_65 | Nigerian Journal of Psychiatry             | Associations of Psychiatrists in Nigeria          | Non-commercial | Nigeria | Nigeria | Specialised | No  | 2005 | no | 3  | no | no | no  |
| AJOL_66 | Nigerian Journal of Surgery                | Medknow Publications                              | Commercial     | India   | Nigeria | Specialised | Yes | 2009 | no | 2  | no | no | yes |
| AJOL_67 | Nigerian Journal of Surgical Research      | Medknow Publications                              | Commercial     | India   | Nigeria | Specialised | Yes | 2000 | no | 4  | no | no | yes |
| AJOL_68 | Nigerian Journal of Surgical Sciences      | Medknow Publications                              | Commercial     | India   | Nigeria | Specialised | Yes | 2005 | no | 2  | no | no | yes |
| AJOL_69 | Nigerian Medical Journal                   | Medknow Publications                              | Commercial     | India   | Nigeria | General     | Yes | 2005 | no | 4  | no | no | yes |
| AJOL_70 | Nigerian Medical Practitioner              | SAME ventures                                     | Commercial     | Nigeria | Nigeria | General     | No  | 2003 | no | 12 | no | no | no  |
| AJOL_71 | Nigerian Quarterly Journal of              | Lagos University Medical Society                  | Non-commercial | Nigeria | Nigeria | General     | No  | 2003 | no | 4  | no | no | no  |

|         |                                                               |                                                                                                                |                    |                 |                 |             |     |      |    |                      |     |     |     |
|---------|---------------------------------------------------------------|----------------------------------------------------------------------------------------------------------------|--------------------|-----------------|-----------------|-------------|-----|------|----|----------------------|-----|-----|-----|
|         | Hospital<br>Medicine                                          |                                                                                                                |                    |                 |                 |             |     |      |    |                      |     |     |     |
| AJOL_72 | Obstetrics and<br>Gynaecology<br>Forum                        | In House<br>Publications                                                                                       | Commercial         | South<br>Africa | South<br>Africa | Specialised | No  | 2002 | no | 4                    | no  | no  | no  |
| AJOL_73 | Orient Journal<br>of Medicine                                 | Nigerian<br>Medical<br>Association of<br>South-East<br>Nigeria                                                 | Non-<br>commercial | Nigeria         | Nigeria         | General     | Yes | 2003 | no | 4                    | no  | no  | no  |
| AJOL_74 | Pan African<br>Medical<br>Journal                             | PAMJ-Center<br>for Public<br>Health<br>Research and<br>Information<br>African Field<br>Epidemiology<br>Network | Non-<br>commercial | Kenya           | Kenya           | General     | Yes | 2008 | no | not<br>specifie<br>d | no  | yes | no  |
| AJOL_75 | Port Harcourt<br>Medical<br>Journal                           | Medknow<br>Publications                                                                                        | Commercial         | India           | Nigeria         | General     | Yes | 2006 | no | 3                    | no  | no  | yes |
| AJOL_76 | Research<br>Journal of<br>Health<br>Sciences                  | Osun State<br>University                                                                                       | Non-<br>commercial | Nigeria         | Nigeria         | General     | Yes | 2013 | no | 4                    | no  | no  | no  |
| AJOL_77 | Rwanda<br>Journal                                             | University of<br>Rwanda                                                                                        | Non-<br>commercial | Rwanda          | Rwanda          | General     | Yes | 2013 | no | 4                    | yes | no  | no  |
| AJOL_78 | SA Journal of<br>Radiology                                    | AOSIS<br>publishing                                                                                            | Commercial         | South<br>Africa | South<br>Africa | Specialised | Yes | 2004 | no | 4                    | no  | no  | yes |
| AJOL_79 | Sahel Medical<br>Journal                                      | Medknow<br>Publications                                                                                        | Commercial         | India           | Nigeria         | General     | Yes | 2002 | no | 4                    | no  | no  | yes |
| AJOL_80 | Savannah<br>Journal of<br>Medical<br>Research and<br>Practice | University of<br>Ilorin Teaching<br>Hospital                                                                   | Non-<br>commercial | Nigeria         | Nigeria         | General     | No  | 2012 | no | 2                    | no  | no  | no  |

|         |                                                                                |                                                                            |                |              |              |             |     |      |       |    |     |     |     |
|---------|--------------------------------------------------------------------------------|----------------------------------------------------------------------------|----------------|--------------|--------------|-------------|-----|------|-------|----|-----|-----|-----|
| AJOL_81 | Sierra Leone Journal of Biomedical Research                                    | College of Medicine and Allied Health Sciences, University of Sierra Leone | Non-commercial | Sierra Leone | Sierra Leone | General     | Yes | 2009 | no    | 3  | yes | yes | no  |
| AJOL_82 | South African Family Practice                                                  | Medpharm Publications                                                      | Commercial     | South Africa | South Africa | Specialised | Yes | 2002 | no    | 12 | no  | no  | no  |
| AJOL_83 | South African Gastroenterology Review                                          | In House Publications                                                      | Commercial     | South Africa | South Africa | Specialised | No  | 2003 | no    | 4  | no  | no  | no  |
| AJOL_84 | South African Journal for Research in Sport, Physical Education and Recreation | Stellenbosch University                                                    | Non-commercial | South Africa | South Africa | Specialised | No  | 2001 | no    | 2  | no  | no  | no  |
| AJOL_85 | South African Journal of Child Health                                          | Health & Medical Publishing Group                                          | Commercial     | South Africa | South Africa | Specialised | Yes | 2008 | no    | 4  | no  | no  | no  |
| AJOL_86 | South African Journal of Clinical Nutrition                                    | Medpharm Publications                                                      | Commercial     | South Africa | South Africa | Specialised | Yes | 2004 | no    | 4  | no  | no  | no  |
| AJOL_87 | South African Journal of Obstetrics and Gynaecology                            | Health & Medical Publishing Group                                          | Commercial     | South Africa | South Africa | Specialised | Yes | 2005 | no    | 3  | no  | no  | no  |
| AJOL_88 | South African Journal of Psychiatry                                            | AOSIS publishing                                                           | Commercial     | South Africa | South Africa | Specialised | Yes | 2002 | 0.193 | 1  | no  | yes | yes |
| AJOL_89 | South African Journal of                                                       | South African Sports                                                       | Non-commercial | South Africa | South Africa | Specialised | Yes | 2003 | no    | 3  | no  | no  | no  |



|         |                                                                   |                                                  |                    |                 |                 |             |     |      |       |    |    |     |     |
|---------|-------------------------------------------------------------------|--------------------------------------------------|--------------------|-----------------|-----------------|-------------|-----|------|-------|----|----|-----|-----|
|         | Sports<br>Medicine                                                | Medicine<br>Association                          |                    |                 |                 |             |     |      |       |    |    |     |     |
| AJOL_90 | South African<br>Journal of<br>Surgery                            | Health &<br>Medical<br>Publishing<br>Group       | Commercial         | South<br>Africa | South<br>Africa | Specialised | Yes | 2004 | 0.462 | 4  | no | no  | no  |
| AJOL_91 | South African<br>Medical<br>Journal                               | Health &<br>Medical<br>Publishing<br>Group       | Commercial         | South<br>Africa | South<br>Africa | General     | Yes | 1983 | 1.5   | 12 | no | no  | no  |
| AJOL_92 | South Sudan<br>Medical<br>Journal                                 | South Sudan<br>Doctors'<br>Association           | Non-<br>commercial | South<br>Sudan  | South<br>Sudan  | General     | Yes | 2008 | no    | 4  | no | no  | no  |
| AJOL_93 | Southern<br>African<br>Journal of<br>Anaesthesia<br>and Analgesia | Medpharm<br>publications                         | Commercial         | South<br>Africa | South<br>Africa | Specialised | Yes | 2002 | no    | 6  | no | no  | no  |
| AJOL_94 | Southern<br>African<br>Journal of<br>Critical Care                | Health &<br>Medical<br>Publishing<br>Group       | Commercial         | South<br>Africa | South<br>Africa | Specialised | Yes | 2004 | no    | 2  | no | no  | no  |
| AJOL_95 | Southern<br>African<br>Journal of HIV<br>Medicine                 | AOSIS<br>publishing                              | Commercial         | South<br>Africa | South<br>Africa | Specialised | Yes | 2000 | 0.529 | 1  | no | yes | yes |
| AJOL_96 | Sudan Journal<br>of Medical<br>Sciences                           | Omdurman<br>Islamic<br>University                | Non-<br>commercial | Sudan           | Sudan           | General     | Yes | 2006 | no    | 3  | no | no  | no  |
| AJOL_97 | Tanzania<br>Journal of<br>Health<br>Research                      | National<br>Institute for<br>Medical<br>Research | Non-<br>commercial | Tanzania        | Tanzania        | General     | Yes | 2001 | no    | 4  | no | no  | no  |
| AJOL_98 | Tropical<br>Journal of                                            | College of<br>Medicine,                          | Non-<br>commercial | Nigeria         | Nigeria         | General     | No  | 2005 | no    | 2  | no | no  | no  |

|          |                                                |                       |                |         |         |             |     |      |       |    |    |    |     |
|----------|------------------------------------------------|-----------------------|----------------|---------|---------|-------------|-----|------|-------|----|----|----|-----|
|          | Health Sciences                                | University of Ilorin  |                |         |         |             |     |      |       |    |    |    |     |
| AJOL_99  | Tropical Journal of Medical Research           | Medknow Publications  | Commercial     | India   | Nigeria | General     | Yes | 2004 | no    | 2  | no | no | yes |
| AJOL_100 | Tropical Journal of Obstetrics and Gynaecology | Medknow Publications  | Commercial     | India   | Nigeria | Specialised | Yes | 2001 | no    | 2  | no | no | yes |
| AJOL_101 | Tropical Journal of Pharmaceutical Research    | Pharmacotherapy Group | Non-commercial | Nigeria | Nigeria | Specialised | Yes | 2002 | 0.543 | 24 | no | no | no  |
| AJOL_102 | West African Journal of Radiology              | Medknow Publications  | Commercial     | India   | Nigeria | Specialised | No  | 2000 | no    | 1  | no | no | yes |

1  
2  
3  
4  
5  
6  
7  
8  
9  
10  
11  
12  
13  
14  
15  
16  
17  
18  
19  
20  
21  
22  
23  
24  
25  
26  
27  
28  
29  
30  
31  
32  
33  
34  
35  
36  
37  
38  
39  
40  
41  
42  
43  
44  
45  
46  
47  
48  
49  
50  
51  
52  
53  
54  
55  
56  
57  
58  
59  
60

For peer review only

## Supplementary file 4: Table of excluded journals

| Journal Name                                                           | Reason                                                    |
|------------------------------------------------------------------------|-----------------------------------------------------------|
| 1. Abia State University Medical Students' Association Journal         | Last issue in 2015                                        |
| 2. Africa Sanguine                                                     | Last issue in 2015                                        |
| 3. African Journal for the Psychological Study of Social Issues        | Not health research                                       |
| 4. African Journal of AIDS Research                                    | Not LMIC journal – Editor in chief not in LMIC            |
| 5. African Journal of Cross-Cultural Psychology and Sport Facilitation | Last issue 2008                                           |
| 6. African Journal of Environmental Science and Technology             | Not LMIC journal – Editor in chief not in LMIC            |
| 7. African Journal of Neurological Science                             | Not LMIC journal – Editor in chief not in LMIC            |
| 8. African Journal of Oral Health                                      | Last issue in 2006                                        |
| 9. African Journal of Oral Health Sciences                             | Last issue in 2008                                        |
| 10. African Journal of Physiotherapy and Rehabilitation Science        | Last issue in 2015                                        |
| 11. African Journal of Urology                                         | Not LMIC journal – Publisher not in LMIC                  |
| 12. Afrimedical Journal                                                | No issue in 2016                                          |
| 13. Alexandria Journal of Medicine                                     | Not LMIC journal – Publisher not in LMIC                  |
| 14. Annals of Pediatric Surgery                                        | Not LMIC journal – Publisher not in LMIC                  |
| 15. Arab Journal of Nephrology and Transplantation                     | Last issue in 2014                                        |
| 16. Archives of Ibadan Medicine                                        | Last issue in 2006                                        |
| 17. Archives of Medical and Biomedical Research                        | Not LMIC journal – Editor in chief not in LMIC            |
| 18. Benin Journal of Postgraduate Medicine                             | Last issue in 2010                                        |
| 19. Clinics in Mother and Child Health                                 | Not LMIC journal – Editor in chief and publisher not LMIC |
| 20. Continuing Medical Education                                       | Not LMIC journal – Publisher not in LMIC                  |
| 21. Counsellor (The)                                                   | Last issue in 2014                                        |
| 22. Dar Es Salaam Medical Students' Journal                            | Last issue in 2012                                        |
| 23. East African Journal of Public Health                              | Last issue in 2015                                        |
| 24. East and Central African Journal of Pharmaceutical Sciences        | Last issue in 2013                                        |
| 25. Ebonyi Medical Journal                                             | Last issue in 2012                                        |
| 26. Edo Journal of Counselling                                         | Last issue in 2011                                        |
| 27. Edo Journal of Counselling                                         | Last issue 2011                                           |
| 28. Egyptian Journal of Medical Human Genetics                         | Not LMIC journal – Publisher not in LMIC                  |
| 29. Egyptian Journal of Medical Laboratory Sciences                    | Last issue in 2001                                        |
| 30. Ethiopian Pharmaceutical Journal                                   | Last issue in 2015                                        |
| 31. Gender and Behaviour                                               | Not health research                                       |
| 32. Global Journal of Community Medicine                               | Last issue in 2009                                        |
| 33. Global Journal of Medical Sciences                                 | Last issue in 2011                                        |
| 34. Health SA Gesondheid                                               | Not LMIC journal – Publisher not in LMIC                  |
| 35. IMTU Medical Journal                                               | Last issue in 2015                                        |
| 36. Indo-Pacific Journal of Phenomenology                              | Not LMIC journal – Publisher not in LMIC                  |

1  
2  
3  
4  
5  
6  
7  
8  
9  
10  
11  
12  
13  
14  
15  
16  
17  
18  
19  
20  
21  
22  
23  
24  
25  
26  
27  
28  
29  
30  
31  
32  
33  
34  
35  
36  
37  
38  
39  
40  
41  
42  
43  
44  
45  
46  
47  
48  
49  
50  
51  
52  
53  
54  
55  
56  
57  
58  
59  
60

|                                                                                      |                                                              |
|--------------------------------------------------------------------------------------|--------------------------------------------------------------|
| 37. International Journal of Emotional Psychology and Sport Ethics                   | Last issue 2008                                              |
| 38. International Journal of Health Research                                         | Last issue in 2012                                           |
| 39. International Journal of Malaria and Tropical Diseases (IJMTD)                   | Last issue in 2005                                           |
| 40. International Journal of Medicine and Health Development                         | Last issue in 2014                                           |
| 41. Journal of Biomedical Investigation                                              | Last issue 2009                                              |
| 42. Journal of Child and Adolescent Mental Health                                    | Not LMIC journal – Publisher not in LMIC                     |
| 43. Journal of Ethiopian Medical Practice                                            | Last issue in 2002                                           |
| 44. Journal of Health and Visual Sciences                                            | Last issue in 2015                                           |
| 45. Journal of Medical Investigation and Practice                                    | Last issue 2015                                              |
| 46. Journal of Medical Laboratory Science                                            | Last issue 2012                                              |
| 47. Journal of Medicine and Medical Science                                          | Last issue in 1999                                           |
| 48. Journal of Phytomedicine and Therapeutics                                        | Last issue 2015                                              |
| 49. Journal of Psychology in Africa                                                  | Not a LMIC journal – Publisher not in LMIC                   |
| 50. Journal of Surgical Technique and Case Report                                    | Last issue 2015                                              |
| 51. Journal of the Eritrean Medical Association                                      | Last issues 2009                                             |
| 52. Journal of the Nigerian Infection Control Association                            | Last issue 2001                                              |
| 53. Journal of the Nigerian Optometric Associatio                                    | Last issue in 2010                                           |
| 54. Journal of the Obafemi Awolowo University Medical Student's Association (IFEMED) | Last issue in 2014                                           |
| 55. Journal Tunisien d'ORL et de Chirurgie Cervico-Faciale                           | Publishes in French.                                         |
| 56. Libyan Journal of Medicine                                                       | Not LMIC journal – Editor in chief and publisher not in LMIC |
| 57. Mary Slessor Journal of Medicine                                                 | Last issue 2013                                              |
| 58. Nigerian Dental Journal                                                          | Last issue 2014                                              |
| 59. Nigerian Endocrine Practice                                                      | Last issue 2013                                              |
| 60. Nigerian Journal of Clinical and Counselling Psychology                          | Last issue 2002                                              |
| 61. Nigerian Journal of Health and Biomedical Sciences                               | Last issue 2010                                              |
| 62. Nigerian Journal of Nutritional Sciences                                         | Last issue 2012                                              |
| 63. Nigerian Journal of Orthopaedics and Trauma                                      | Last issue in 2013                                           |
| 64. Nigerian Journal of Otorhinolaryngology                                          | Last issue in 2006                                           |
| 65. Nigerian Journal of Pharmaceutical Research                                      | Last issue 2011                                              |
| 66. Nigerian Journal of Postgraduate Medicine                                        | Last issue 2010                                              |
| 67. Revue Africaine de Chirurgie et Spécialités                                      | Publishes in French                                          |
| 68. Revue de Médecine et de Pharmacie                                                | Publishes in French                                          |
| 69. Rwanda Journal of Health Sciences                                                | Last issue 2013                                              |
| 70. SAHARA-J: Journal of Social Aspects of HIV/AIDS                                  | Not LMIC journal – Publisher not in LMIC                     |
| 71. Science et Technique, Sciences de la Santé                                       | Last issue in 2015.                                          |
| 72. Scientific Medical Journal                                                       | Last issue 2001                                              |
| 73. Sokoto Journal of Veterinary Sciences                                            | Veterinary Medicine                                          |
| 74. Sudanese Journal of Dermatology                                                  | Last issue 2010                                              |
| 75. Tanzania Dental Journal                                                          | Last issue 2014                                              |
| 76. Tanzania Medical Journal                                                         | Last issue 2015                                              |

|                                                            |                    |
|------------------------------------------------------------|--------------------|
| 77. West African Journal of Medicine                       | Last issue in 2013 |
| 78. West African Journal of Pharmacology and Drug Research | Last issue in 2015 |
| 79. Zagazig Journal of Occupational Health and Safety      | Last issue 2010    |

For peer review only

1  
2  
3  
4  
5  
6  
7  
8  
9  
10  
11  
12  
13  
14  
15  
16  
17  
18  
19  
20  
21  
22  
23  
24  
25  
26  
27  
28  
29  
30  
31  
32  
33  
34  
35  
36  
37  
38  
39  
40  
41  
42  
43  
44  
45  
46  
47  
48  
49  
50  
51  
52  
53  
54  
55  
56  
57  
58  
59  
60

For peer review only

## Supplementary file 5: Levels of plagiarism and redundancy per section

| Total n=495       | Any       | Level 1:<br>1-2 sentences<br>copied | Level 2:<br>3-6 separate<br>sentences copied | Level 3:<br>4+ linked or<br>6+ separate<br>sentences copied |
|-------------------|-----------|-------------------------------------|----------------------------------------------|-------------------------------------------------------------|
| <i>Plagiarism</i> |           |                                     |                                              |                                                             |
| Abstract          | 49 (10%)  | 42 (8%)                             | 6 (1%)                                       | 1 (0.2%)                                                    |
| Introduction      | 232 (47%) | 113 (23%)                           | 67 (14%)                                     | 52 (11%)                                                    |
| Methods           | 148 (30%) | 86 (17%)                            | 53 (11%)                                     | 9 (2%)                                                      |
| Results           | 15 (3%)   | 8 (2%)                              | 6 (1%)                                       | 1 (0.2%)                                                    |
| Discussion        | 195 (39%) | 89 (18%)                            | 64 (13%)                                     | 42 (9%)                                                     |
| <i>Redundancy</i> |           |                                     |                                              |                                                             |
| Abstract          | 16 (3%)   | 9 (2%)                              | 5 (1%)                                       | 2 (0.4%)                                                    |
| Introduction      | 16 (3%)   | 7 (1%)                              | 4 (1%)                                       | 5 (1%)                                                      |
| Methods           | 52 (11%)  | 16 (3%)                             | 20 (4%)                                      | 16 (3%)                                                     |
| Results           | 13 (3%)   | 5 (1%)                              | 7 (1%)                                       | 1 (0.2%)                                                    |
| Discussion        | 13 (3%)   | 6 (1%)                              | 6 (1%)                                       | 1 (0.2%)                                                    |



## Supplementary file 6: Characteristics of original articles and reviews with plagiarism (n=495)

| Characteristic                             | Overall plagiarism n (%) |           |          |           |
|--------------------------------------------|--------------------------|-----------|----------|-----------|
|                                            | Any                      | Some      | Moderate | Extensive |
| <b>Impact factor</b>                       |                          |           |          |           |
| Yes (n=45)                                 | 23 (51%)                 | 9 (20%)   | 10 (22%) | 4 (9%)    |
| No (n=450)                                 | 290 (64%)                | 125 (28%) | 86 (19%) | 79 (18%)  |
| <b>Open Access</b>                         |                          |           |          |           |
| Yes (n=342)                                | 206 (60%)                | 85 (25%)  | 64 (19%) | 57 (17%)  |
| No (n=153)                                 | 107 (70%)                | 49 (32%)  | 32 (21%) | 26 (17%)  |
| <b>Scope general</b>                       |                          |           |          |           |
| Yes (n=239)                                | 171 (72%)                | 71 (30%)  | 58 (24%) | 42 (18%)  |
| No (n=256)                                 | 142 (55%)                | 63 (25%)  | 38 (15%) | 41 (16%)  |
| <b>Member of AJPP</b>                      |                          |           |          |           |
| Yes (n=35)                                 | 22 (63%)                 | 12 (34%)  | 6 (17%)  | 4 (11%)   |
| No (n=460)                                 | 291 (63%)                | 122 (27%) | 90 (20%) | 79 (17%)  |
| <b>Plagiarism policy available</b>         |                          |           |          |           |
| Yes (n=127)                                | 69 (54%)                 | 31 (24%)  | 21 (17%) | 17 (13%)  |
| No (n=368)                                 | 244 (66%)                | 103 (28%) | 75 (20%) | 66 (18%)  |
| <b>Reference to text-matching software</b> |                          |           |          |           |
| Yes (n=80)                                 | 34 (43%)                 | 18 (23%)  | 11 (14%) | 5 (6%)    |
| No (n=415)                                 | 279 (67%)                | 116 (28%) | 85 (20%) | 78 (19%)  |
| <b>Commercial publisher</b>                |                          |           |          |           |
| Yes (n=205)                                | 112 (55%)                | 51 (25%)  | 33 (16%) | 28 (14%)  |
| No (n=290)                                 | 201 (69%)                | 83 (29%)  | 63 (22%) | 55 (19%)  |
| <b>Country of corresponding author</b>     |                          |           |          |           |
| Nigeria (n=250)                            | 175 (70%)                | 63 (25%)  | 63 (25%) | 49 (20%)  |
| South Africa (n=83)                        | 32 (39%)                 | 19 (23%)  | 6 (7%)   | 7 (8%)    |
| Other African country (n=99)               | 67 (68%)                 | 33 (33%)  | 17 (17%) | 17 (17%)  |
| Non-African country (n=63)                 | 39 (62%)                 | 19 (30%)  | 10 (16%) | 10 (16%)  |
| <b>Type of study</b>                       |                          |           |          |           |
| Cross-sectional study (n=247)              | 164 (66%)                | 78 (32%)  | 50 (20%) | 36 (15%)  |
| Retrospective study (n=65)                 | 40 (62%)                 | 22 (34%)  | 10 (15%) | 8 (12%)   |
| Case Report (n=42)                         | 27 (62%)                 | 10 (24%)  | 9 (21%)  | 8 (19%)   |
| Trial (n=36)                               | 23 (64%)                 | 6 (17%)   | 10 (28%) | 7 (19%)   |
| Cohort study (n=22)                        | 9 (41%)                  | 1 (5%)    | 4 (18%)  | 4 (18%)   |
| Review, (n=21)                             | 14 (67%)                 | 4 (19%)   | 0        | 10 (48%)  |
| Case-control study (n=12)                  | 8 (67%)                  | 0         | 5 (42%)  | 3 (25%)   |
| Case Series (n=12)                         | 5 (42%)                  | 3 (25%)   | 0        | 2 (17%)   |
| Qualitative study (n=9)                    | 6 (67%)                  | 3 (33%)   | 3 (33%)  | 0         |
| Laboratory study (n=8)                     | 6 (75%)                  | 2 (25%)   | 2 (25%)  | 2 (25%)   |
| Mixed-methods (n=7)                        | 2 (29%)                  | 1 (14%)   | 0        | 1 (14%)   |
| Before-after (n=7)                         | 3 (43%)                  | 2 (29%)   | 1 (14%)  | 0         |
| Controlled before-after (n=7)              | 6 (86%)                  | 2 (29%)   | 2 (29%)  | 2 (29%)   |

# BMJ Open

## Plagiarism in research: a survey of African medical journals

|                                 |                                                                                                                                                                                                                                                                                                                                                                                                                                                                                                        |
|---------------------------------|--------------------------------------------------------------------------------------------------------------------------------------------------------------------------------------------------------------------------------------------------------------------------------------------------------------------------------------------------------------------------------------------------------------------------------------------------------------------------------------------------------|
| Journal:                        | <i>BMJ Open</i>                                                                                                                                                                                                                                                                                                                                                                                                                                                                                        |
| Manuscript ID                   | bmjopen-2018-024777.R1                                                                                                                                                                                                                                                                                                                                                                                                                                                                                 |
| Article Type:                   | Research                                                                                                                                                                                                                                                                                                                                                                                                                                                                                               |
| Date Submitted by the Author:   | 04-Sep-2018                                                                                                                                                                                                                                                                                                                                                                                                                                                                                            |
| Complete List of Authors:       | Rohwer, Anke; Stellenbosch University, Centre for Evidence-based Health Care, Division of Epidemiology and Biostatistics, Faculty of Medicine and Health Sciences<br>Wager, Elizabeth; Sideview; Sveuciliste u Splitu, School of Medicine<br>Young, Taryn; Stellenbosch University, Centre for Evidence-based Health Care, Division of Epidemiology and Biostatistics, Faculty of Medicine and Health Sciences<br>Garner, Paul; Liverpool School of Tropical Medicine, Department of Clinical Sciences |
| <b>Primary Subject Heading</b>: | Medical publishing and peer review                                                                                                                                                                                                                                                                                                                                                                                                                                                                     |
| Secondary Subject Heading:      | Medical publishing and peer review                                                                                                                                                                                                                                                                                                                                                                                                                                                                     |
| Keywords:                       | Plagiarism, text-matching software, journal policies, regional journals                                                                                                                                                                                                                                                                                                                                                                                                                                |
|                                 |                                                                                                                                                                                                                                                                                                                                                                                                                                                                                                        |

SCHOLARONE™  
Manuscripts

## Plagiarism in research: a survey of African medical journals

Anke Rohwer<sup>1</sup>, Elizabeth Wager<sup>2,3</sup>, Taryn Young<sup>1</sup>, Paul Garner<sup>4</sup>

<sup>1</sup>Centre for Evidence-based Health Care, Division of Epidemiology and Biostatistics, Faculty of Medicine and Health Sciences, Stellenbosch University, Cape Town, South Africa

<sup>2</sup>Sideview, Princes Risborough, UK

<sup>3</sup>School of Medicine, University of Split, Croatia

<sup>4</sup>Department of Clinical Sciences, Liverpool School of Tropical Medicine, Liverpool, UK

Corresponding author: Anke Rohwer

Centre for Evidence-based Health Care, Division of Epidemiology and Biostatistics,  
Faculty of Medicine and Health Sciences, Stellenbosch University,

Francie van Zijl drive, Parow 7500

Tel: +27-21-9389886

Email: [arohwer@sun.ac.za](mailto:arohwer@sun.ac.za)

Word count: 3135 words

### Keywords:

Plagiarism, text-matching software, journal policies, regional journals

## Abstract

### Objectives

To examine whether regional biomedical journals in Africa had policies on plagiarism and procedures to detect it; and to measure the extent of plagiarism in their original research articles and reviews.

### Design

Cross-sectional survey

### Setting and participants

We selected journals with an editor-in-chief in Africa, a publisher based in a low-or middle-income country (LMIC), and with author guidelines in English, and systematically searched the African Journals Online database (AJOL). From each of the 100 journals identified, we randomly selected five original research articles or reviews published in 2016.

### Outcomes

For included journals, we examined the presence of plagiarism policies and whether they referred to text-matching software. We submitted articles to Turnitin and measured the extent of plagiarism (copying of someone else's work) or redundancy (copying of one's own work) against a set of criteria we had developed and piloted.

### Results

Of the 100 journals, 26 had a policy on plagiarism, and 16 referred to text-matching software. Of 495 articles, 313 (63%; 95%CI 58 to 68%) had evidence of plagiarism: 17% (83) had at least four linked copied or more than six individual copied sentences; 19% (96) had three to six copied sentences, and the remainder had one or two copied sentences. Plagiarism was more common in the introduction and discussion, and uncommon in the results.

### Conclusion

Plagiarism is common in biomedical research articles and reviews published in Africa. Whilst wholesale plagiarism was uncommon, moderate text plagiarism was extensive. This could rapidly be eliminated if journal editors implemented screening strategies including text-matching software.

### Strengths and Limitations

- This study is the first to systematically research plagiarism in African biomedical journals.
- We developed a method for reporting the extent of plagiarism beyond the overall similarity index.
- Our analysis was limited to text and excluded images and data.
- The high level of plagiarism we identified could easily be solved by screening all articles with text-matching software and automatic rejection of articles showing plagiarism.
- We used an online source, the African Journals Online database, as the sampling frame for our study.

## Introduction

Plagiarism is a serious form of research misconduct when authors copy text, ideas or images from another source, and take credit for it.<sup>1,2</sup> The severity varies from copying short phrases to copying of a whole paper. Besides the amount of text that is copied, assessors should consider how it was referenced, whether the deception was intentional or not, as well as whether the copied text is a commonly used or an original phrase.<sup>3,4</sup> Redundant publication is an umbrella term for reusing one's own work and ranges from reusing large parts of already published text (text-recycling), to publishing parts of the same study in more than one paper (salami slicing) and republishing entire papers (duplicate publication) and is also considered poor practice.<sup>5,6</sup>

The availability of material on the internet facilitates mosaic writing and plagiarism, but the widespread availability of text-matching software has improved detection so there is now more awareness of research integrity and research misconduct, including plagiarism. Policies are clearly available through the Committee on Publication Ethics (COPE), encouraging journal editors to screen submitted manuscripts for plagiarism.<sup>7</sup> Publishing systems and standards have advanced rapidly with online publishing in a global world, and there are some cooperative programmes between the big and local players to help local players keep up with advances. An example of this is the African Journals Partnership Project (AJPP), a programme that partners African journals with mentor journals from the USA and UK.<sup>8</sup>

Estimates of the occurrence of plagiarism are largely based on findings from a systematic review by Pupovac and Fanelli (2014), who reported self-reported plagiarism estimates of 1.7% (95%CI 1.2 to 2.4) for participants admitting to having plagiarised and 30% (95% CI 17 to 46) for participants knowing about others who had done so.<sup>9</sup> However, none of the included studies were conducted in LMICs, although we know from our own work that Cochrane authors in Africa and other LMICs report plagiarism is common in host institutions.<sup>10</sup> Any self-reported estimate is probably not an accurate reflection of actual practice, mainly due to social-desirability bias.<sup>11</sup> Some studies have examined plagiarism more objectively by using text-matching software to screen manuscripts<sup>12-15</sup>, however mostly these examined manuscripts submitted to journals (before publication) and none of them included manuscripts submitted to or published in African journals.

We sought to examine whether regional biomedical journals in Africa had policies on plagiarism and procedures to detect it; and to measure the extent of plagiarism in their published original research articles.

## Methods

### Study design and sample

We surveyed original research articles published in biomedical journals indexed on African Journals Online database (AJOL).<sup>16</sup> Journals were eligible if their current editor-in-chief was based in Africa, the publisher was based in a LMIC (according to the World Bank),<sup>17</sup> if policies and author guidelines were available in English and if the journal published an issue in 2016. All eligible journals were selected. From each eligible journal, we selected articles published in 2016 as original research articles, including qualitative and quantitative primary studies, literature reviews and systematic reviews, published in English. We excluded editorials and letters. We used Microsoft Excel to generate a list of random numbers to select five articles from each eligible journal. We selected five articles per journal, as initial scoping of journals indexed on AJOL revealed substantial variation in the number of published articles per issue, as well as the number of published issues per year.

### Data collection

For eligible journals, we downloaded policies and author instructions from the journal's website. We extracted data on the presence and content of policies and guidelines on plagiarism. For original

1  
2  
3 research articles, we downloaded the full text (PDF) of each article. We extracted data on the  
4 number of authors, country of corresponding author and type of study. One author (AR) extracted  
5 data using a pre-specified, piloted data extraction form (Supplementary file 1) and entered it into  
6 Excel.

7  
8 We measured the presence and extent of plagiarism (copying of someone else's work) and  
9 redundancy (copying of one's own work) in all included research articles. We submitted the PDFs of  
10 all articles to Turnitin text-matching software. Turnitin generated a similarity report containing the  
11 overall similarity index (OSI), expressed as the percentage of matching text,<sup>18</sup> excluding quotations  
12 and references. We manually reviewed all similarity reports with the plagiarism framework (Table 1).  
13 As we were not able to find any existing guidance to objectively assess the extent of plagiarism, we  
14 developed a framework based on suggestions from COPE<sup>3</sup> and Wager (2014),<sup>4</sup> that propose  
15 differentiating between clear plagiarism and minor copying of someone else's (plagiarism) and one's  
16 own text (redundancy). We assessed the extent of plagiarism, stratified by which section of the  
17 research paper it appeared in.

18  
19 We identified copied sentences from the similarity reports. Sentences had to be substantially or  
20 completely copied. When a sentence had been clearly copied but prefixed by "However" or  
21 "Researchers found that..." this was classed as copying; and where plagiarised strings of sentences  
22 were detected joined together with conjunctions this was classed as copying (Supplementary file 2).  
23 Once we identified a copied sentence, we checked the source of the original sentence, as stated in  
24 the similarity report. If the source of the original sentence contained one or more of the authors of  
25 the article under investigation, we classified it as redundancy, whereas if the source of the original  
26 sentence was from other authors, we classified it as plagiarism.

27  
28 For each section of the article, we counted the number of copied sentences and assigned one of  
29 three levels, depending on the number of copied sentences (Table 1). We then assigned an overall  
30 plagiarism category, using the same criteria for each section of the article, to describe the extent of  
31 plagiarism, namely "some", "moderate", or "extensive" plagiarism (Table 1). As methods copying  
32 was common, and can happen when people are using standard methods, we adjusted the definition  
33 to take this into account. Therefore, copying of one to two sentences in the methods section was not  
34 regarded as plagiarism, copying of three to six sentences was regarded as some plagiarism and  
35 copying of more than six sentences or at least four linked sentences was regarded as moderate  
36 plagiarism (Table 1). Overall redundancy was scored in an equivalent way and for each article.  
37 Separate scores were given for plagiarism and redundancy.

38  
39 Development of the framework was an iterative process, and piloted by AR and EW who  
40 independently assessed similarity reports of 10 articles and discussed results with the entire  
41 research team. Once the team had agreed on the framework, one author (AR) scored all similarity  
42 reports using the framework and another author (EW) independently scored a random selection of  
43 10% of reports. Any disagreements in rating were resolved by consensus.  
44  
45  
46  
47  
48  
49  
50  
51  
52  
53  
54  
55  
56  
57  
58  
59  
60

Table 1: Plagiarism framework

|                      | Number of copied sentences detected                                                                        |                                                                                                              |                                                                                                                 |
|----------------------|------------------------------------------------------------------------------------------------------------|--------------------------------------------------------------------------------------------------------------|-----------------------------------------------------------------------------------------------------------------|
|                      | Level 1                                                                                                    | Level 2                                                                                                      | Level 3                                                                                                         |
| Abstract             | 1 to 2                                                                                                     | 3 to 6                                                                                                       | 6+; or 4 + linked                                                                                               |
| Background           | 1 to 2                                                                                                     | 3 to 6                                                                                                       | 6+; or 4 + linked                                                                                               |
| Methods              | 1 to 2                                                                                                     | 3 to 6                                                                                                       | 6+; or 4 + linked                                                                                               |
| Results              | 1 to 2                                                                                                     | 3 to 6                                                                                                       | 6+; or 4 + linked                                                                                               |
| Discussion           | 1 to 2                                                                                                     | 3 to 6                                                                                                       | 6+; or 4 + linked                                                                                               |
| <b>Overall score</b> | <b>Some plagiarism</b>                                                                                     | <b>Moderate plagiarism</b>                                                                                   | <b>Extensive plagiarism</b>                                                                                     |
| <b>Definition</b>    | One or more sections with plagiarism of one to two sentences; or level 2 plagiarism in the methods section | One or more sections with plagiarism of three to six sentences; or level 3 plagiarism in the methods section | One or more sections with plagiarism of four or more linked sentences, or plagiarism of more than six sentences |

## Data analysis

We used SPSS (version 25)<sup>19</sup> for analysis and report categorical data as frequencies and proportions and continuous data as medians, means and standard deviations, or modes and ranges. For plagiarism and redundancy, we calculated 95% confidence intervals (CI), adjusted for clustering at the journal level using robust standard errors, with STATA (version 15).<sup>20</sup>

## Patient and public involvement

We did not involve patients or the public in this study.

## Ethical issues

All data used in this study was available online and is thus in the public domain. To ensure anonymity of authors, we did not include information identifying individual research articles in our report. We obtained an ethics exemption from the Stellenbosch University Health Research Ethics Committee (X17/08/010). Where we detected serious plagiarism in published papers, we identified the journal editors and are currently writing to them, informing them of our findings.

## Results

Of the 179 biomedical journals indexed on AJOL, 100 met the eligibility criteria and were included in the study (Figure 1). Detailed characteristics of journals are reported in the table of included journals (Supplementary file 3), while excluded journals are listed in the table of excluded journals (Supplementary file 4).

We selected five original research articles published in the 2016 issue of each journal. Some had not published this number (one journal only published two research articles, and two journals published four research articles). For these we included all research articles published in 2016, giving a total of 495 research articles included (Figure 1).

### Plagiarism policies in included journals

Twenty six percent of the journals had a policy on plagiarism mentioned on their website (Table 2). More journals with open (35%) compared to paid (6%) access and more specialised (38%) compared to general (13%) journals mentioned a policy. Journals with a plagiarism policy included both those from non-commercial (22%) and commercial (32%) publishers. Journals with the same commercial publisher generally had similar policies. All journals published by 'AOSIS publications' or 'Health and Medical Publishing Group' had a policy and referred to text-matching software. None of the journals



published by 'Medknow publications' (19 journals) and 'In House publications' (2 journals) mentioned a policy. For 'Medpharm publications', three of the four journals had a plagiarism policy, but only one of these also referred to text-matching software. Of the nine journals with an impact factor, three did not have a policy on plagiarism and six of the seven AJPP member journals had no policy.

Sixteen journals stated that they used text-matching software to check for plagiarism, of these, there were more journals from commercial (24%) than non-commercial publishers (10%); more journals with open (20%) than paid access (3%); and more specialised (25%) than general (6%) journals (Table 2).

Table 2: Plagiarism policies in included journals (n=100)

|                                      | Publisher                       |                                          | Access             |                    | Scope          |                    | Total (n=100) |
|--------------------------------------|---------------------------------|------------------------------------------|--------------------|--------------------|----------------|--------------------|---------------|
|                                      | Non-commercial publisher (n=59) | Commercial publisher <sup>1</sup> (n=41) | Open access (n=69) | Paid access (n=31) | General (n=48) | Specialised (n=52) |               |
| Plagiarism policy available          | 13 (22%)                        | 13 (32%)                                 | 24 (35%)           | 2 (6%)             | 6 (13%)        | 20 (38%)           | 26            |
| Definition of plagiarism             | 5 (8%)                          | 9 (22%)                                  | 13 (19%)           | 1 (3%)             | 2 (4%)         | 12 (23%)           | 14            |
| Reference to text-matching software  | 6 (10%)                         | 10 (24%)                                 | 14 (20%)           | 2 (6%)             | 3 (6%)         | 13 (25%)           | 16            |
| Consequences of plagiarism described | 11 (19%)                        | 10 (24%)                                 | 20 (29%)           | 1 (3%)             | 6 (13%)        | 15 (29%)           | 21            |
| Reference to COPE flowchart          | 2 (3%)                          | 2 (5%)                                   | 3 (4%)             | 1 (3%)             | 0              | 4 (8%)             | 4             |

<sup>1</sup>Medknow Publications, based in India (19 journals); Health & Medical Publishing group (6 journals), Medpharm Publications (4 journals), AOSIS Publishing (3 journals) In House publications (2 journals) and LAM publications limited (1 journal), all based in South Africa; Bookbuilders Africa (1 journal), Michael Joanna Publications (1 journal), Fine Print and Manufacturers (1 journal), CME ventures (1 journal) and SAME ventures (1 journal) based in Nigeria; and AKS publications (1 journal), based in Mauritius.

### Characteristics of included research articles (n=495)

Characteristics of included research articles are summarised in Table 3. Most articles were published in open-access journals (69%), and about half (48%) in a journal with a general scope; 41% were published in journals from a commercial publisher. Non-commercial publishers included research institutions and academic organizations that published their journals themselves.

Nine journals had an impact factor, and accounted for 9% of the papers included, and seven journals were members of the AJPP (7% of research articles). Articles had a median of three authors (min 1, max 10). Overall, half of the included articles had corresponding authors based in Nigeria. Half (50%) of the included articles represented cross-sectional studies.

Table 3: Summary of characteristics of included articles (n=495)

| Characteristic | n (%) |
|----------------|-------|
|----------------|-------|



| Published in journal with:      |           |
|---------------------------------|-----------|
| Impact factor                   | 45 (9%)   |
| Open access                     | 342 (69%) |
| General scope                   | 239 (48%) |
| Commercial publisher            | 205 (41%) |
| AJJP membership                 | 35 (7%)   |
| Country of corresponding author |           |
| Nigeria                         | 250 (51%) |
| South Africa                    | 83 (17%)  |
| Other African country           | 99 (20%)  |
| Non-African country             | 63 (13%)  |
| Type of study                   |           |
| Cross-sectional study           | 247 (50%) |
| Retrospective study             | 65 (13%)  |
| Case report                     | 42 (9%)   |
| Trial                           | 36 (7%)   |
| Cohort study                    | 22 (4%)   |
| Review                          | 21 (4%)   |
| Case-control study              | 12 (2%)   |
| Other                           | 50 (10%)  |

#### Overall similarity index (OSI) of included articles

A summary of the OSIs for all included articles is reported in Table 4. The median OSI was 15%, with a minimum OSI of 0% and a maximum of 68%. Of all included papers, 90% had an OSI of 30% or less. All five articles with an OSI of 50% or more were published in non-commercial journals.

Table 4: OSI's of included articles (n=495)

| OSI        | Number of articles (%) |
|------------|------------------------|
| 0 to 10%   | 137 (28)               |
| 11 to 20%  | 202 (41)               |
| 21 to 30%  | 104 (21)               |
| 31 to 40%  | 34 (7)                 |
| 41 to 50%  | 13 (3)                 |
| 51 to 60%  | 2 (0.4)                |
| 61 to 70%  | 3 (0.6)                |
| 71 to 100% | 0                      |

#### Rates and extent of plagiarism and redundancy per section of article

The presence of plagiarism varied across different sections of the articles (Supplementary file 5). We did not find widespread plagiarism or redundancy in the results sections of included articles. Plagiarism was mostly in the introduction of articles (47%) followed by the discussion (39%) and the methods section (30%). The extent of plagiarism also varied across sections, and plagiarism of one to two sentences occurred most commonly. Plagiarism in the introduction comprised one to two copied sentences in 23% of articles, three to six copied discrete sentences in 14% and at least four linked or more than six discrete copied sentences in 11% of articles. In the discussion section, plagiarism comprised one to two copied sentences in 18% of articles, three to six copied sentences in 13% and at least four linked or more than six discrete copied sentences in 9% of articles.

Redundancy was mostly seen in the methods section of included articles (11%), comprising one to two copied sentences in 3% of articles, three to six copied sentences in 4% and at least four linked or more than six discrete copied sentences in 3% of articles (Supplementary file 5).

### Overall plagiarism in included articles

We found plagiarism (any level) in 63% articles, comprising some plagiarism in 27%, moderate plagiarism in 19% and extensive plagiarism in 17% of articles (Table 5).

Table 5: Overall plagiarism (n=495)

| Plagiarism score                      | Definition                                                                                                               | n   | % (95 CI)       |
|---------------------------------------|--------------------------------------------------------------------------------------------------------------------------|-----|-----------------|
| <b>Any level of plagiarism</b>        | At least one or more sections with plagiarism of one to two sentences; or level 2 plagiarism in the methods section      | 313 | 63% (58 to 68%) |
| <b>Some plagiarism (Level 1)</b>      | One or more sections with plagiarism of one to two sentences;                                                            | 134 | 27% (23 to 32%) |
| <b>Moderate plagiarism (Level 2)</b>  | One or more sections with plagiarism of three to six sentences; or level 3 plagiarism in the methods section             | 96  | 19% (16 to 23%) |
| <b>Extensive plagiarism (Level 3)</b> | One or more sections with plagiarism of four or more linked sentences, or plagiarism of more than six separate sentences | 83  | 17% (13 to 21%) |

We explored the characteristics of articles with plagiarism (Table 6). Articles published in journals that referred to text-matching software tended to have less plagiarism than those in journals that did not refer to text-matching software with rates of 43% vs. 66% respectively for any level of plagiarism and 6% vs. 19% for extensive plagiarism. The difference in plagiarism rates for articles published in a journal with a policy on plagiarism (54%) compared to those published in a journal without a policy on plagiarism (66%) was smaller. Although the proportion of reviews with any plagiarism was comparable to other studies, almost half of all included reviews (48%) had extensive plagiarism.

Table 6: Characteristics of original articles and reviews with plagiarism (n=495)

| Characteristic                     | Overall plagiarism n (%) |           |          |           |
|------------------------------------|--------------------------|-----------|----------|-----------|
|                                    | Any                      | Some      | Moderate | Extensive |
| <b>Impact factor</b>               |                          |           |          |           |
| Yes (n=45)                         | 23 (51%)                 | 9 (20%)   | 10 (22%) | 4 (9%)    |
| No (n=450)                         | 290 (64%)                | 125 (28%) | 86 (19%) | 79 (18%)  |
| <b>Open Access</b>                 |                          |           |          |           |
| Yes (n=342)                        | 206 (60%)                | 85 (25%)  | 64 (19%) | 57 (17%)  |
| No (n=153)                         | 107 (70%)                | 49 (32%)  | 32 (21%) | 26 (17%)  |
| <b>Scope general</b>               |                          |           |          |           |
| Yes (n=239)                        | 171 (72%)                | 71 (30%)  | 58 (24%) | 42 (18%)  |
| No (n=256)                         | 142 (55%)                | 63 (25%)  | 38 (15%) | 41 (16%)  |
| <b>Member of AJPP</b>              |                          |           |          |           |
| Yes (n=35)                         | 22 (63%)                 | 12 (34%)  | 6 (17%)  | 4 (11%)   |
| No (n=460)                         | 291 (63%)                | 122 (27%) | 90 (20%) | 79 (17%)  |
| <b>Plagiarism policy available</b> |                          |           |          |           |

|                                            |           |           |          |          |
|--------------------------------------------|-----------|-----------|----------|----------|
| Yes (n=127)                                | 69 (54%)  | 31 (24%)  | 21 (17%) | 17 (13%) |
| No (n=368)                                 | 244 (66%) | 103 (28%) | 75 (20%) | 66 (18%) |
| <b>Reference to text-matching software</b> |           |           |          |          |
| Yes (n=80)                                 | 34 (43%)  | 18 (23%)  | 11 (14%) | 5 (6%)   |
| No (n=415)                                 | 279 (67%) | 116 (28%) | 85 (20%) | 78 (19%) |
| <b>Commercial publisher</b>                |           |           |          |          |
| Yes (n=205)                                | 112 (55%) | 51 (25%)  | 33 (16%) | 28 (14%) |
| No (n=290)                                 | 201 (69%) | 83 (29%)  | 63 (22%) | 55 (19%) |
| <b>Country of corresponding author</b>     |           |           |          |          |
| Nigeria (n=250)                            | 175 (70%) | 63 (25%)  | 63 (25%) | 49 (20%) |
| South Africa (n=83)                        | 32 (39%)  | 19 (23%)  | 6 (7%)   | 7 (8%)   |
| Other African country (n=99)               | 67 (68%)  | 33 (33%)  | 17 (17%) | 17 (17%) |
| Non-African country (n=63)                 | 39 (62%)  | 19 (30%)  | 10 (16%) | 10 (16%) |
| <b>Type of study</b>                       |           |           |          |          |
| Cross-sectional study (n=247)              | 164 (66%) | 78 (32%)  | 50 (20%) | 36 (15%) |
| Retrospective study (n=65)                 | 40 (62%)  | 22 (34%)  | 10 (15%) | 8 (12%)  |
| Case report (n=42)                         | 27 (62%)  | 10 (24%)  | 9 (21%)  | 8 (19%)  |
| Trial (n=36)                               | 23 (64%)  | 6 (17%)   | 10 (28%) | 7 (19%)  |
| Cohort study (n=22)                        | 9 (41%)   | 1 (5%)    | 4 (18%)  | 4 (18%)  |
| Review, (n=21)                             | 14 (67%)  | 4 (19%)   | 0        | 10 (48%) |
| Case-control study (n=12)                  | 8 (67%)   | 0         | 5 (42%)  | 3 (25%)  |
| Case series (n=12)                         | 5 (42%)   | 3 (25%)   | 0        | 2 (17%)  |
| Qualitative study (n=9)                    | 6 (67%)   | 3 (33%)   | 3 (33%)  | 0        |
| Laboratory study (n=8)                     | 6 (75%)   | 2 (25%)   | 2 (25%)  | 2 (25%)  |
| Mixed-methods (n=7)                        | 2 (29%)   | 1 (14%)   | 0        | 1 (14%)  |
| Before-after (n=7)                         | 3 (43%)   | 2 (29%)   | 1 (14%)  | 0        |
| Controlled before-after (n=7)              | 6 (86%)   | 2 (29%)   | 2 (29%)  | 2 (29%)  |

Redundancy was less common than plagiarism. Overall, 11% of articles had any level of redundancy, comprising 4% of articles with some redundancy, 4% with moderate redundancy and 2% with extensive redundancy (Table 7).

Table 7: Overall redundancy (n=495)

| Redundancy score                      | Definition                                                                                                          | n  | % (95 CI)      |
|---------------------------------------|---------------------------------------------------------------------------------------------------------------------|----|----------------|
| <b>Any level of redundancy</b>        | At least one or more sections with redundancy of one to two sentences; or level 2 redundancy in the methods section | 54 | 11% (8 to 15%) |
| <b>Some redundancy (Level 1)</b>      | One or more sections with redundancy of one to two sentences; or level 2 redundancy in the methods section          | 21 | 4% (3 to 7%)   |
| <b>Moderate redundancy (Level 2)</b>  | One or more sections with redundancy of three to six sentences; or level 3 redundancy in the methods section        | 22 | 4% (3 to 7%)   |
| <b>Extensive redundancy (Level 3)</b> | One or more sections with redundancy of four or more linked sentences, or redundancy of more than six sentences     | 11 | 2% (1 to 4%)   |

### Accuracy of various OSI thresholds

We explored the accuracy of various thresholds of OSIs according to our plagiarism framework (Table 8). With an OSI threshold of 5%, sensitivity was high, meaning that 97% of articles with any level of plagiarism were correctly identified as such and only 3% of articles with any level of plagiarism were missed. However, specificity was low, meaning only 17% of articles without any plagiarism were correctly identified as such and the rate of false positives was high (83%). Increasing the threshold led to a decreased sensitivity and increased specificity.

Table 8: Sensitivity and specificity of various OSI thresholds

| OSI threshold | Sensitivity | Specificity |
|---------------|-------------|-------------|
| OSI >5%       | 97%         | 17%         |
| OSI >10%      | 84%         | 51%         |
| OSI >15%      | 66%         | 83%         |

### Discussion

Our study is the first to explore actual levels of plagiarism in biomedical journals from Africa. We proposed a framework to measure plagiarism, as an OSI generated by text-matching software on its own is not sufficient to describe the presence and extent of copied text. Indeed, the OSI is only an indication of the proportion (%) of copied text<sup>1</sup> and there is no consensus of an acceptable threshold. Indeed, the reported sensitivity of OSI thresholds varies across studies. In our sample, the sensitivity for an OSI threshold of 10% was 84%, compared to 97% for a threshold of 5%. Taylor and colleagues found an even lower sensitivity of 67% for an OSI threshold of 11.5%, excluding citations and references,<sup>21</sup> while Higgins and colleagues (2016) found that an OSI threshold of 10% yielded a sensitivity of 95.5%.<sup>13</sup> Zhang (2010) used text-matching software to screen manuscripts submitted to a Chinese journal for plagiarism<sup>14</sup> and found that 23% contained plagiarism or redundancy, of which a quarter contained high levels of plagiarism. However, it is not clear how plagiarism was defined. A study from Pakistan that assessed plagiarism of submitted manuscripts<sup>15</sup> found that 39% of papers contained plagiarised text, using a strict definition of the presence of one or more copied sentences. They reported similar results for papers from Turkey and China. A study assessing plagiarism in manuscripts submitted to the Croatian Medical Journal<sup>12</sup> identified plagiarism, defined as an OSI of more than 10% in any section of the manuscript, in 11% (85/754) of manuscripts, of which 8% (63/754) were classified as plagiarism of others, while 3% (22/754) was self-plagiarism (i.e. redundancy). In a sample of 400 manuscripts submitted to an American speciality journal, 17% were found to have at least one copied sentence. Half of these (53%) were regarded as being self-plagiarism.<sup>13</sup> Our study assessed plagiarism in published articles and found a much higher rate of plagiarism than other studies. In our sample, 72% of articles had an OSI above 10%, and 63% (95% CI 58 to 68%) had any level of plagiarism, while 11% (95%CI 8 to 15%) had any level of redundancy. It is possible that the rate of plagiarism in manuscripts submitted to these journals (but not published) is even higher.

In line with recommendations for best practices,<sup>6,7,22</sup> increasing numbers of journal editors and publishers, especially the large publishing houses, make use of text-matching software to screen submitted manuscripts for copied text.<sup>23</sup> But, software licences are expensive and some smaller journals, especially institutional journals and those with non-commercial publishers, may not be able to afford them.<sup>24</sup> Indeed, we found that of the 26% of journals that had a policy of plagiarism, most were from commercial publishers. In addition, only 16% of journals in our sample mentioned the use of text-matching software.

Our framework is limited in that it only measures plagiarism in terms of the number of copied sentences, although it does take into account where in the article the copied text was found. We considered plagiarism in the methods section to be less serious than plagiarism in other sections of the articles, as it is sometime difficult to avoid repeating standard descriptions of methods.<sup>5,25</sup> Our

1  
2  
3 framework does not, however, consider other aspects of plagiarism, such as how the text was  
4 referenced, whether the copied text referred to a standard phrase or common knowledge and  
5 whether plagiarism was intentional or not,<sup>4</sup> which are important aspects to consider when making  
6 judgements about plagiarism. The framework is also limited to plagiarism of text and does not take  
7 into account plagiarism of data or images (which is also a limitation of text-matching software). To  
8 test our framework, one author (AR) checked all the articles, and another author (EW) checked a  
9 random sample of 10% of articles. While our scores for overall plagiarism were mostly consistent we  
10 found that variations depended on how we scored borderline cases in terms of what was considered  
11 a completely copied sentence. The framework therefore may lack precision in terms of interrater  
12 reliability and test-retest reliability and needs further testing. However, we found that the  
13 framework was still a useful tool which facilitated assessment across articles and represented the  
14 extent of plagiarism well.  
15

16 We were interested in regional journals and wanted to examine smaller and non-mainstream  
17 journals based in Africa. We considered various sampling frames, but few met our requirements. We  
18 chose AJOL to sample journals, as it hosts over 500 journals, including 179 biomedical journals, from  
19 over 30 African countries. In addition, journals indexed on AJOL need to meet certain criteria linked  
20 to good publishing practices. These include, inter alia, a functioning editorial board, peer-review of  
21 content and availability of content in electronic format.<sup>16</sup> In light of the known challenges in  
22 identifying and accessing African biomedical journals,<sup>26 27</sup> we thus considered AJOL to be a  
23 comprehensive and pragmatic sampling frame, although it does not represent all African biomedical  
24 journals.  
25

26 The recently established African Network for Research Integrity (ANRI) has recognised the need to  
27 raise widespread awareness about research integrity among African researchers to prevent poor  
28 practices related to plagiarism, redundant publication, authorship and conflicts of interest.<sup>28</sup>  
29 Furthermore, the need to build capacity of African journals to improve the quality and visibility of  
30 African research has previously been recognised. In an attempt to address this need, the AJPP was  
31 initiated in 2004.<sup>8 27</sup> In addition to building capacity of specific member journals, the project has also  
32 envisaged that the African members become “regional leaders and share their acquired knowledge  
33 and experience with other editors and journals on the continent”.<sup>27</sup> Although only seven of our  
34 included journals were members of AJPP, the proportion of articles with any level of plagiarism was  
35 the same for member and non-member journals. Only one of the seven AJPP member journals  
36 mentioned a policy on plagiarism. It is possible that journals had plagiarism policies but did not  
37 mention them on their online information; however, given the actual amount of plagiarism we  
38 found, we think this is unlikely, and since one purpose of such policies is to act as a deterrent we  
39 believe they should be clearly publicised by journals.  
40

41 The level of plagiarism in African biomedical journals is concerning. African journals should aim to  
42 meet global expectations and follow best practices with regards to their policies and guidelines on  
43 plagiarism. This includes using text-matching software to detect plagiarism and redundancy in  
44 submitted manuscripts. Not only will this help to verify the originality of submitted work, but it also  
45 has the potential to deter poor practices. However, although text-matching software is a useful  
46 screening tool, editors should not rely on the OSI on its own. A high similarity score should trigger  
47 detailed assessment by a knowledgeable editor, but the possibility of false positives and false  
48 negatives should always be borne in mind and was clearly shown in our study. Our plagiarism  
49 framework provides an approach to classify the extent of plagiarism. Further testing of the tool is  
50 necessary to determine validity and reliability.  
51  
52

53 This paper has uncovered a major problem with writing and publishing in medical science in Africa  
54 needing attention both through institutional development of expectations and good practice in  
55  
56  
57  
58  
59  
60

1  
2  
3 academic institutions, and development of journal editorial procedures to detect and respond to the  
4 problem.  
5  
6  
7

## 8 Acknowledgements

9 We would like to thank Selvan Naidoo and Traci Naidoo for their assistance in eligibility assessment  
10 of journals and Tonya Esterhuizen for statistical support.  
11

12 Anke Rohwer conducted this research as part of her PhD at Stellenbosch University, South Africa.

13 All authors are supported by the Effective Health Care Research Consortium. This Consortium is  
14 funded by UK aid from the UK Government for the benefit of developing countries (Grant: 5242).  
15 The views expressed in this publication do not necessarily reflect UK government policy.  
16  
17

## 18 Contributions of authors

19 All authors contributed to the design of the study and the development of the plagiarism  
20 framework. AR collected and analysed data from journals and articles with input from TY, PG, and  
21 EW. AR reviewed all manuscripts using the plagiarism framework and EW independently reviewed  
22 10% of included articles. AR drafted the manuscript. TY, PG and EW critically engaged with the  
23 manuscript and provided input. All authors approved the final version of the manuscript.  
24  
25

## 26 Competing interests

27 Paul Garner is part of Cochrane, an organization that routinely uses Turnitin. Elizabeth Wager has  
28 given workshops on plagiarism and spoken at a conference funded by Turnitin. Anke Rohwer and  
29 Taryn Young do not have any known conflicts of interest.  
30  
31

## 32 Data sharing

33 Unpublished data from the study is available upon request from AR.  
34  
35

## 36 References

- 37 1. Helgesson G, Eriksson S. Plagiarism in research. *Med Health Care Philos* 2015;18(1):91-  
38 101. doi: 10.1007/s11019-014-9583-8 [published Online First: 2014/07/06]
- 39 2. Steneck N. ORI Introduction to the responsible conduct of research2007. Available from:  
40 <https://ori.hhs.gov/ori-introduction-responsible-conduct-research>
- 41 3. Committee on Publication Ethics (COPE). What to do if you suspect plagiarism 2013.  
42 Available from: <http://publicationethics.org/files/plagiarism%20B.pdf>
- 43 4. Wager E. Defining and responding to plagiarism. *Learned Publishing* 2014;27(1):33-42.  
44 doi: 10.1087/20140105
- 45 5. Roig M. Avoiding plagiarism, self-plagiarism, and other questionable writing practices: A  
46 guide to ethical writing, 2006.
- 47 6. World Association of Medical Editors (WAME). Recommendations on Publication Ethics  
48 Policies for Medical Journals: WAME; 2017. Available from:  
49 <http://www.wame.org/about/recommendations-on-publication-ethics-policie>  
50 accessed 8 August 2017 .
- 51 7. Committee on Publication Ethics (COPE). Code of conduct and best practice guidelines for  
52 journal editors 2011 [updated Accessed on 2 February 2017. Available from:  
53 [http://publicationethics.org/files/Code\\_of\\_conduct\\_for\\_journal\\_editors\\_Mar11.pdf](http://publicationethics.org/files/Code_of_conduct_for_journal_editors_Mar11.pdf).
- 54 8. African Journal Partnership Project (AJPP). 2016. Available from: <https://ajpp-online.org/>.  
55  
56  
57  
58  
59



- 1
- 2
- 3 9. Pupovac V, Fanelli D. Scientists Admitting to Plagiarism: A Meta-analysis of Surveys. *Science and engineering ethics* 2014 doi: 10.1007/s11948-014-9600-6
- 4
- 5 10. Rohwer A, Young T, Wager E, et al. Authorship, plagiarism and conflict of interest: views
- 6 and practices from low/middle-income country health researchers. *BMJ open*
- 7 2017;7(11):e018467. doi: 10.1136/bmjopen-2017-018467
- 8
- 9 11. Fisher RJ, Katz JE. Social-desirability bias and the validity of self-reported values.
- 10 *Psychology & Marketing* 2000;17(2):105-20.
- 11
- 12 12. Bazdaric K, Bilic-Zulle L, Brumini G, et al. Prevalence of plagiarism in recent submissions
- 13 to the Croatian Medical Journal. *Science and engineering ethics* 2012;18(2):223-39.
- 14 doi: 10.1007/s11948-011-9347-2
- 15
- 16 13. Higgins JR, Lin FC, Evans JP. Plagiarism in submitted manuscripts: incidence,
- 17 characteristics and optimization of screening-case study in a major specialty medical
- 18 journal. *Res Integr Peer Rev* 2016;1:13. doi: 10.1186/s41073-016-0021-8 [published
- 19 Online First: 2016/10/10]
- 20
- 21 14. Zhang HY. CrossCheck: an effective tool for detecting plagiarism. *Learned Publishing*
- 22 2010;23(1):9-14. doi: 10.1087/20100103
- 23
- 24 15. Jamali R, Ghazinoory S, Sadeghi M. Plagiarism and ethics of knowledge. *Journal of*
- 25 *Information Ethics* 2014;23(1):101-10. doi: 10.3172/jie.23.1.101
- 26
- 27 16. African Journals Online (AJOL). Available from: <https://www.ajol.info/>.
- 28
- 29 17. World Bank. World Bank list of economies 2016. Available from:
- 30 [Siteresources.worldbank.org/DATASTATISTICS/Resources/CLASS.XLS](http://Siteresources.worldbank.org/DATASTATISTICS/Resources/CLASS.XLS)
- 31
- 32 18. Turnitin. Turnitin Instructor QuickStart guide. Available from:
- 33 [https://guides.turnitin.com/01\\_Manuals\\_and\\_Guides/Instructor\\_Guides/01\\_Instruct](https://guides.turnitin.com/01_Manuals_and_Guides/Instructor_Guides/01_Instruct)
- 34 [or QuickStart Guide#Evaluating Originality Reports](https://guides.turnitin.com/01_Manuals_and_Guides/Instructor_Guides/01_Instruct) accessed 14 February 2017.
- 35
- 36 19. IBM SPSS Statistics for Windows [program]. 25 version. Armonk, NY, 2017.
- 37
- 38 20. Stata Statistical Software [program]. 15 version. College Station, TX: StataCorp LLC 2017.
- 39
- 40 21. Taylor DB. Plagiarism in Manuscripts Submitted to the AJR: Development of an Optimal
- 41 Screening Algorithm and Management Pathways. *AJR Am J Roentgenol*
- 42 2017;209(1):W56. doi: 10.2214/AJR.17.18078
- 43
- 44 22. Kleinert S, Wager E. Responsible research publication: international standards for
- 45 editors. A position statement developed at the 2nd World Conference on Research
- 46 Integrity, Singapore, July 22-24, 2010. In: Mayer T, Steneck N, eds. Promoting
- 47 Research Integrity in a Global Environment. Singapore: Imperial College Press/World
- 48 Scientific Publishing 2011:317-28.
- 49
- 50 23. Kleinert S. Checking for plagiarism, duplicate publication, and text recycling. *The Lancet*
- 51 2011;377(9762):281-82. doi: 10.1016/s0140-6736(11)60075-5
- 52
- 53 24. Gasparyan AY, Nurmashev B, Seksenbayev B, et al. Plagiarism in the Context of
- 54 Education and Evolving Detection Strategies. *J Korean Med Sci* 2017;32(8):1220-27.
- 55 doi: 10.3346/jkms.2017.32.8.1220
- 56
- 57 25. Roig M. Plagiarism: Consider the context (letter to the editor. *Science* 2009;325:813-4.
- 58
- 59 26. Siegfried N, Busgeeth K, Certain E. Scope and geographical distribution of African
- 60 medical journals active in 2005. *S Afr Med J* 2006;96(6):533-8.
27. Goehl TJ, Flanagan A. Enhancing the quality and visibility of African medical and health journals. *Environ Health Perspect* 2008;116(12):A514-5. doi: 10.1289/ehp.12265
28. Makoni M. Network seeks to lift African research integrity: Nature Index; 2018. Available from: <https://www.natureindex.com/news-blog/network-seeks-to-lift-african-research-integrity>.

## Figures

Figure 1: Flow diagram of included journals and research articles

For peer review only



1  
2  
3  
4  
5  
6  
7  
8  
9  
10  
11  
12  
13  
14  
15  
16  
17  
18  
19  
20  
21  
22  
23  
24  
25  
26  
27  
28  
29  
30  
31  
32  
33  
34  
35  
36  
37  
38  
39  
40  
41  
42  
43  
44  
45  
46  
47  
48  
49  
50  
51  
52  
53  
54  
55  
56  
57  
58  
59  
60

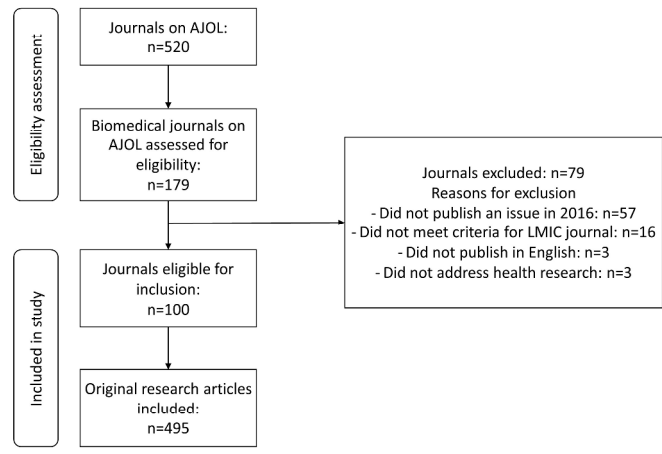

Figure 1: Flow diagram of included journals and research articles

338x190mm (300 x 300 DPI)

Review only

## Supplementary file 1: Data extraction forms

## 1.1 Data extraction form for journal policies and guidelines

| General information                                              |     |           |
|------------------------------------------------------------------|-----|-----------|
| Journal name                                                     |     |           |
| Website                                                          |     |           |
| Scope                                                            |     |           |
| Publisher                                                        |     |           |
| Country where publisher is based                                 |     |           |
| Country where editor in chief is based                           |     |           |
| LMIC journal?                                                    | Yes |           |
|                                                                  | No  |           |
| Impact factor                                                    | Yes |           |
|                                                                  | No  |           |
| Publication frequency                                            |     |           |
| Open access                                                      | Yes |           |
|                                                                  | No  |           |
| Scope general?                                                   | Yes |           |
|                                                                  | No  |           |
| Plagiarism                                                       |     |           |
| Policy available                                                 | Yes |           |
|                                                                  | No  |           |
| Description on what constitutes plagiarism?                      | Yes | Describe: |
|                                                                  | No  |           |
| Reference to plagiarism software?                                | Yes |           |
|                                                                  | No  |           |
| Consequences of plagiarism described?                            | Yes | Describe: |
|                                                                  | No  |           |
| Reference to COPE flow-diagram?                                  | Yes |           |
|                                                                  | No  |           |
| Authorship                                                       |     |           |
| Guideline available                                              | Yes | Describe: |
|                                                                  | No  |           |
| Guideline in line with updated ICMJE criteria (i.e. 4 criteria)? | Yes |           |
|                                                                  | No  |           |
| Guideline in line with old ICMJE criteria (i.e. 3 criteria)?     | Yes |           |
|                                                                  | No  |           |
| Contributorship policy                                           | Yes | Describe: |
|                                                                  | No  |           |
| Information on acknowledgement practices                         | Yes | Describe  |
|                                                                  | No  |           |
| Conflict of interest                                             |     |           |
| Guideline available                                              | Yes |           |
|                                                                  | No  |           |

|                                        |     |          |
|----------------------------------------|-----|----------|
| Definition of a conflict of interest   | Yes | Describe |
|                                        | No  |          |
| Guidance on what to declare            | Yes |          |
|                                        | No  |          |
| <b>Funding sources</b>                 |     |          |
| Guideline available                    | Yes |          |
|                                        | No  |          |
| Information on what to declare         | Yes | Describe |
|                                        | No  |          |
| Guidance on how to declare funding     | Yes | Describe |
|                                        | No  |          |
| Funding statement in publication       | Yes |          |
|                                        | No  |          |
| <b>ICMJE</b>                           |     |          |
| Do they mention ICMJE recommendations? | Yes |          |
|                                        | No  |          |
| Is there a link to the ICMJE website?  | Yes |          |
|                                        | No  |          |
| Is there a link to the ICMJE document? | Yes |          |
|                                        | No  |          |
| Notes                                  |     |          |

## 1.2 Data extraction form for all research articles

|                                                                   |     |                                                                    |
|-------------------------------------------------------------------|-----|--------------------------------------------------------------------|
| <b>General information</b>                                        |     |                                                                    |
| Study ID                                                          |     |                                                                    |
| Type of study                                                     |     |                                                                    |
| Number of authors                                                 |     |                                                                    |
| Country of contact author                                         |     |                                                                    |
| <b>Authorship</b>                                                 |     |                                                                    |
| Did authors disclose contributions of authors?                    | Yes | Describe                                                           |
|                                                                   | No  |                                                                    |
| For each author: Which ICMJE criteria are met?                    | Yes |                                                                    |
|                                                                   | No  |                                                                    |
| Are any other contributors listed in the acknowledgement section? | Yes | Describe                                                           |
|                                                                   | No  |                                                                    |
| <b>Conflicts of interest</b>                                      |     |                                                                    |
| Did authors declare conflicts of interest                         | Yes | None known                                                         |
|                                                                   |     | Financial conflicts of interest                                    |
|                                                                   |     | Non-financial conflicts of interest                                |
| No                                                                |     |                                                                    |
| <b>Funding sources</b>                                            |     |                                                                    |
| Did authors disclose funding sources?                             | Yes | Commercial funding                                                 |
|                                                                   |     | Non-commercial external funding e.g. grants, NPOs, private funders |
|                                                                   |     | No external funding                                                |
| No                                                                |     |                                                                    |
| <b>Plagiarism</b>                                                 |     |                                                                    |
| Turnitin similarity score                                         |     |                                                                    |

|               |            |          |
|---------------|------------|----------|
| Score >10%?   | Yes        |          |
|               | No         |          |
| No plagiarism | Yes        |          |
|               | No         |          |
| Abstract      | Plagiarism | Level 1  |
|               |            | Level 2  |
|               |            | Level3   |
|               | Redundancy | Level 1  |
|               |            | Level 2  |
|               |            | Level3   |
| Introduction  | Plagiarism | Level 1  |
|               |            | Level 2  |
|               |            | Level3   |
|               | Redundancy | Level 1  |
|               |            | Level 2  |
|               |            | Level3   |
| Methods       | Plagiarism | Level 1  |
|               |            | Level 2  |
|               |            | Level3   |
|               | Redundancy | Level 1  |
|               |            | Level 2  |
|               |            | Level3   |
| Results       | Plagiarism | Level 1  |
|               |            | Level 2  |
|               |            | Level3   |
|               | Redundancy | Level 1  |
|               |            | Level 2  |
|               |            | Level3   |
| Discussion    | Plagiarism | Level 1  |
|               |            | Level 2  |
|               |            | Level3   |
|               | Redundancy | Level 1  |
|               |            | Level 2  |
|               |            | Level3   |
| Overall       | Plagiarism | Mild     |
|               |            | Moderate |
|               |            | Severe   |
|               | Redundancy | Mild     |
|               |            | Moderate |
|               |            | Severe   |
| Notes         |            |          |

1  
2  
3  
4  
5  
6  
7  
8  
9  
10  
11  
12  
13  
14  
15  
16  
17  
18  
19  
20  
21  
22  
23  
24  
25  
26  
27  
28  
29  
30  
31  
32  
33  
34  
35  
36  
37  
38  
39  
40  
41  
42  
43  
44  
45  
46  
47  
48  
49  
50  
51  
52  
53  
54  
55  
56  
57  
58  
59  
60

For peer review only

1  
2  
3 **Supplementary file 2: Dummy OSI report generated by Turnitin**  
4  
5

6 We submitted a dummy text linked to our own work to Turnitin, that generated an OSI report. In this hypothetical example,  
7 we demonstrate how we counted copied sentences.  
8  
9  
10  
11  
12  
13  
14  
15  
16  
17  
18  
19  
20  
21  
22  
23  
24  
25  
26  
27  
28  
29  
30  
31  
32  
33  
34  
35  
36  
37  
38  
39  
40  
41  
42  
43  
44  
45  
46  
47  
48  
49  
50  
51  
52  
53  
54  
55  
56  
57  
58  
59  
60

For peer review only

1

2  
3  
4  
5  
6  
7  
8  
9  
10  
11  
12  
13  
14  
15  
16  
17  
18  
19  
20  
21  
22  
23  
24  
25  
26  
27  
28  
29  
30  
31  
32  
33  
34  
35  
36  
37  
38  
39  
40  
41  
42  
43  
44  
45  
46  
47  
48  
49  
50  
51  
52  
53  
54  
55  
56  
57  
58  
59  
60

1  
There are few empirical studies on irresponsible research practices from low-and middle income countries (LMICs). Only one of the systematic reviews mentioned above [8] included studies conducted in LMICs – three of the 14 studies that contributed data to the meta-analysis. Published literature focuses on high-income countries and research misconduct in terms of data falsification, data fabrication and plagiarism [6, 9]. In LMICs research outputs are increasing (both locally and with international collaborations), national policies on research integrity are lacking [10] and the pressure to perform and live up to global standards is rising. In this context, adequate systems, processes and guidelines are needed to ensure ethical behaviour, address poor research reporting practices and promote research integrity [11]. Understanding researchers' perceptions of and experiences with good and poor reporting practices is key to inform activities that promote research integrity and further research in this field.

We counted 4 linked copied sentences in this paragraph

We developed and piloted an online questionnaire (Supplementary file 1). We created nine hypothetical scenarios related to guest authorship, ghost authorship, plagiarism, redundant publication and declaration of conflicts of interest. After each scenario, we asked participants to answer three questions in order to elicit responses on participants' understanding and occurrence of acceptable and unacceptable reporting practices. Questions followed a similar pattern for all scenarios. In addition, there was an opportunity to add free-text comments or clarifications after each scenario.

We did not count this sentence as being plagiarised

Results from the survey indicated that guest authorship is a common occurrence. Participants commented extensively on these scenarios, alluding to the relevance and complexity of the problem and providing some reasons for engaging in this practice. Results from the interviews mirrored those of the survey and provided further insight into the magnitude of the problem. Interviewees told many stories describing what happened at institutions and elaborated on the reasons already provided in the survey. Survey respondents thought that omitting an author who had made substantial contributions was unacceptable – yet, they indicated that this did occur at their institutions. Free-text comments on this practice showed that respondents had strong feelings about this, especially where they themselves had experienced omission from publications in the past. These feelings were echoed in the interviews and participants elaborated on the power play between junior and senior researchers. Indeed, this was one of the main themes that emerged from the data.

Survey respondents thought that plagiarism was unacceptable. Quantitative responses were underlined by free-text comments and respondents seemed to be very clear about this form of misconduct. Interviewees reiterated these views. They were very aware of the consequences of plagiarism, one interviewee appropriately saying: *"it's like doping in sports"*.

1  
Of all the irresponsible practices explored, perceptions and occurrence of guest authorship stood out. In light of the availability of international guidelines [20] and journal requirements on contributions of authors, this result is striking although not unexpected when considering results of other studies. A meta-analysis on the misuse of authorship [8] found a self-reported prevalence of 55% (95%CI 45% to 64%) amongst health researchers from countries outside of the USA and UK, including South Africa, India and Bangladesh. A survey conducted amongst medical professionals in India [21] found a high prevalence of guest authorship (65%; 101/155), while in a study conducted in Nigeria, 36% (47/133) of participating health professionals indicated that they had encountered disagreements about authorship [22]. In our survey, 77% (153/198) of respondents indicated that guest authorship occurred at their institutions.

We counted 6 linked copied sentences in this paragraph

## Supplementary file 3: Characteristics of included journals

| Journal ID | Journal Name                                              | Publisher                                   | Type of publisher | Country      |                 | Scope       | Open access | First online issue | Impact Factor | Issues/year  | AJPP member | Member of COPE |           |
|------------|-----------------------------------------------------------|---------------------------------------------|-------------------|--------------|-----------------|-------------|-------------|--------------------|---------------|--------------|-------------|----------------|-----------|
|            |                                                           |                                             |                   | Publisher    | Editor-in-Chief |             |             |                    |               |              |             | Journal        | Publisher |
| AJOL_1     | African Health Sciences                                   | Faculty of Medicine, Makerere University    | Non-commercial    | Uganda       | Uganda          | General     | Yes         | 2001               | 0.642         | 4            | yes         | no             | no        |
| AJOL_2     | African Journal for Physical Activity and Health Sciences | LAM publications Limited                    | Commercial        | South Africa | South Africa    | General     | No          | 2002               | no            | 4            | no          | no             | no        |
| AJOL_3     | African Journal of Anaesthesia and Intensive Care         | Mirral Printing Press                       | Non-commercial    | Nigeria      | Nigeria         | Specialised | No          | 2008               | no            | 2            | no          | no             | no        |
| AJOL_4     | African Journal of Biomedical Research                    | Biomedical Communications Group             | Non-commercial    | Nigeria      | Nigeria         | General     | Yes         | 1999               | no            | 3            | no          | no             | no        |
| AJOL_5     | African Journal of Clinical and Experimental Microbiology | AJCEM Life line publishers                  | Non-commercial    | Nigeria      | Nigeria         | General     | Yes         | 2002               | no            | 3            | no          | no             | no        |
| AJOL_6     | African Journal of Drug and                               | African Centre for Research and Information | Non-commercial    | Nigeria      | Nigeria         | Specialised | Yes         | 2008               | no            | not reported | no          | no             | no        |



|         |                                                 |                                                                        |                |                                     |              |             |     |      |    |   |    |    |     |
|---------|-------------------------------------------------|------------------------------------------------------------------------|----------------|-------------------------------------|--------------|-------------|-----|------|----|---|----|----|-----|
|         | Alcohol Studies                                 | on Substance Abuse (CRISA)                                             |                |                                     |              |             |     |      |    |   |    |    |     |
| AJOL_7  | African Journal of Health Professions Education | Health and medical publishing group                                    | Commercial     | South Africa                        | South Africa | Specialised | Yes | 2009 | no | 2 | no | no | no  |
| AJOL_8  | African Journal of Health Sciences              | Kenya Medical Research Institute and African Forum for Health Sciences | Non-commercial | Kenya                               | Kenya        | General     | No  | 2002 | no | 4 | no | no | no  |
| AJOL_9  | African Journal of Infectious Disease           | Obafemi Awolowo University                                             | Non-commercial | Nigeria                             | Nigeria      | Specialised | Yes | 2007 | no | 2 | no | no | no  |
| AJOL_10 | African Journal of Paediatric Nephrology        | African Paediatric Nephrology Association (AFPNA)                      | Non-commercial | Nigeria                             | Nigeria      | Specialised | No  | 2014 | no | 2 | no | no | no  |
| AJOL_11 | African Journal of Paediatric Surgery           | Medknow Publications                                                   | Commercial     | India                               | Nigeria      | Specialised | Yes | 2004 | no | 2 | No | No | yes |
| AJOL_12 | African Journal of Reproductive Health          | Women's Health and Action Research Centre (WHARC)                      | Non-commercial | Nigeria                             | Nigeria      | Specialised | No  | 1999 | no | 4 | no | no | no  |
| AJOL_13 | African Journal of Rheumatology                 | African League of Associations for                                     | Non-commercial | Africa (regional offices in Africa) | South Africa | Specialised | No  | 2013 | no | 2 | no | no | no  |

|         |                                                                         |                                                          |                |          |          |             |     |      |       |               |     |    |     |
|---------|-------------------------------------------------------------------------|----------------------------------------------------------|----------------|----------|----------|-------------|-----|------|-------|---------------|-----|----|-----|
|         |                                                                         | Rheumatology (AFLAR)                                     |                |          |          |             |     |      |       |               |     |    |     |
| AJOL_14 | African Journal of Traditional, Complementary and Alternative Medicines | African Networks Ethnomedicines                          | Non-commercial | Nigeria  | Nigeria  | Specialised | No  | 2004 | 0.553 | 3             | no  | no | no  |
| AJOL_15 | Anatomy Journal of Africa                                               | Association of Anatomical Societies of Africa            | Non-commercial | Kenya    | Kenya    | Specialised | Yes | 2012 | no    | 2             | no  | no | no  |
| AJOL_16 | Annals of African Medicine                                              | Medknow Publications                                     | Commercial     | India    | Nigeria  | General     | Yes | 2002 | no    | 2             | no  | no | yes |
| AJOL_17 | Annals of African Surgery                                               | The Surgical Society of Kenya/Medics Management services | Non-commercial | Kenya    | Kenya    | Specialised | Yes | 2007 | no    | 2             | yes | no | no  |
| AJOL_18 | Annals of Ibadan Postgraduate Medicine                                  | Bookbuilders Africa                                      | Commercial     | Nigeria  | Nigeria  | General     | Yes | 2003 | no    | 2             | no  | no | no  |
| AJOL_19 | Annals of Medical and Health Sciences Research                          | Medknow Publications                                     | Commercial     | India    | Nigeria  | General     | Yes | 2011 | no    | not specified | no  | no | yes |
| AJOL_20 | Annals of Nigerian Medicine                                             | Medknow Publications                                     | Commercial     | India    | Nigeria  | General     | Yes | 2005 | no    | 2             | no  | no | yes |
| AJOL_21 | Central African                                                         | University of Zimbabwe                                   | Non-commercial | Zimbabwe | Zimbabwe | General     | No  | 1999 | no    | not specified | no  | no | no  |

|         |                                                            |                                                                                     |                |              |              |             |     |      |    |    |     |     |    |
|---------|------------------------------------------------------------|-------------------------------------------------------------------------------------|----------------|--------------|--------------|-------------|-----|------|----|----|-----|-----|----|
|         | Journal of Medicine                                        |                                                                                     |                |              |              |             |     |      |    |    |     |     |    |
| AJOL_22 | East African Medical Journal                               | Kenya Medical Association                                                           | Non-commercial | Kenya        | Kenya        | General     | No  | 1999 | no | 12 | no  | no  | no |
| AJOL_23 | East African Orthopaedic Journal                           | Kenya Orthopaedic Association                                                       | Non-commercial | Kenya        | Kenya        | Specialised | Yes | 2007 | no | 2  | no  | no  | no |
| AJOL_24 | East and Central African Journal of Surgery                | Association of Surgeons of East Africa/College of surgeons of East Africa (COSECSA) | Non-commercial | Tanzania     | Uganda       | Specialised | Yes | 1996 | no | 2  | no  | no  | no |
| AJOL_25 | Egyptian Journal of Pediatric Allergy and Immunology (The) | The Egyptian Society of Pediatric Allergy and Immunology                            | Non-commercial | Egypt        | Egypt        | Specialised | Yes | 2003 | no | 2  | no  | no  | no |
| AJOL_26 | Ergonomics SA                                              | Ergonomics Society of South Africa                                                  | Non-commercial | South Africa | South Africa | Specialised | No  | 2008 | no | 2  | no  | no  | no |
| AJOL_27 | Ethiopian Journal of Health Development                    | Ethiopian Public Health Society                                                     | Non-commercial | Ethiopia     | Ethiopia     | General     | Yes | 2000 | no | 3  | no  | no  | no |
| AJOL_28 | Ethiopian Journal of Health Sciences                       | Jimma University                                                                    | Non-commercial | Ethiopia     | Ethiopia     | General     | Yes | 1999 | no | 6  | yes | yes | no |
| AJOL_29 | Ghana Medical Journal                                      | Ghana Medical Association                                                           | Non-commercial | Ghana        | Ghana        | General     | Yes | 2004 | no | 4  | yes | yes | no |

|         |                                                                 |                                                                     |                |           |           |             |     |      |    |   |    |     |    |
|---------|-----------------------------------------------------------------|---------------------------------------------------------------------|----------------|-----------|-----------|-------------|-----|------|----|---|----|-----|----|
| AJOL_31 | Highland Medical Research Journal                               | Highland Medical Research Limited                                   | Non-commercial | Nigeria   | Nigeria   | General     | No  | 2002 | no | 2 | no | no  | no |
| AJOL_32 | IFE Psychologia                                                 | The Ife Center for Psychological Studies                            | Non-commercial | Nigeria   | Nigeria   | Specialised | No  | 1998 | no | 2 | no | no  | no |
| AJOL_33 | International Journal of Basic, Applied and Innovative Research | Antonio Research publications                                       | Non-commercial | Nigeria   | Nigeria   | General     | Yes | 2012 | no | 4 | no | no  | no |
| AJOL_34 | International Journal of Herbs and Pharmacological Research     | Antonio Research publications                                       | Non-commercial | Nigeria   | Nigeria   | Specialised | Yes | 2012 | no | 4 | no | no  | no |
| AJOL_35 | International Journal of Medicine and Biomedical Research       | Michael Joanna Publications                                         | Commercial     | Nigeria   | Nigeria   | General     | Yes | 2012 | no | 3 | no | yes | no |
| AJOL_36 | Internet Journal of Medical Update - EJOURNAL                   | AKS publication                                                     | Commercial     | Mauritius | Mauritius | General     | Yes | 2006 | no | 2 | no | no  | no |
| AJOL_37 | Jos Journal of Medicine                                         | Association of Resident Doctors of Jos University Teaching Hospital | Non-commercial | Nigeria   | Nigeria   | General     | Yes | 2009 | no | 3 | no | no  | no |

|         |                                                                    |                                                                           |                |              |              |             |     |      |    |               |    |    |     |
|---------|--------------------------------------------------------------------|---------------------------------------------------------------------------|----------------|--------------|--------------|-------------|-----|------|----|---------------|----|----|-----|
| AJOL_38 | Journal of Basic and Clinical Reproductive Sciences                | Nigerian Medical Association                                              | Non-commercial | Nigeria      | Nigeria      | Specialised | Yes | 2012 | no | 2             | no | no | no  |
| AJOL_40 | Journal of Community Medicine and Primary Health Care              | Association of Community Physicians of Nigeria                            | Non-commercial | Nigeria      | Nigeria      | Specialised | Yes | 2004 | no | 2             | no | no | no  |
| AJOL_41 | Journal of Endocrinology , Metabolism and Diabetes of South Africa | Medpharm Publications                                                     | Commercial     | South Africa | South Africa | Specialised | Yes | 2004 | no | 3             | no | no | no  |
| AJOL_42 | Journal of Experimental and Clinical Anatomy                       | Medknow Publications                                                      | Commercial     | India        | Nigeria      | Specialised | Yes | 2003 | no | 2             | no | no | yes |
| AJOL_43 | Journal of Medical and Biomedical Sciences                         | School of Medicine and Health Science, University for Development Studies | Non-commercial | Ghana        | Ghana        | General     | Yes | 2012 | no | not specified | no | no | no  |
| AJOL_44 | Journal of Medicine and Biomedical Research                        | Fine Print and Manufacturer Ltd                                           | Commercial     | Nigeria      | Nigeria      | General     | Yes | 2002 | no | 2             | no | no | no  |
| AJOL_45 | Journal of Medicine in the Tropics                                 | Medknow Publications                                                      | Commercial     | India        | Nigeria      |             | Yes | 2002 | no | 2             | no | no | yes |
| AJOL_46 | Journal of Obstetrics and                                          | Kenya Obstetrical                                                         | Non-commercial | Kenya        | Kenya        | Specialised | No  | 2011 | no | 4             | no | no | no  |

|         |                                               |                                                                                       |                |         |         |         |     |      |       |    |     |     |     |
|---------|-----------------------------------------------|---------------------------------------------------------------------------------------|----------------|---------|---------|---------|-----|------|-------|----|-----|-----|-----|
|         | Gynaecology of Eastern and Central Africa     | and Gynaecological Society (KOGS)                                                     |                |         |         |         |     |      |       |    |     |     |     |
| AJOL_47 | Journal of Pharmaceutical and Allied Sciences | Department of Pharmaceutics University of Nigeria                                     | Non-commercial | Nigeria | Nigeria | General | No  | 2004 | no    | 2  | no  | yes | no  |
| AJOL_48 | Malawi Medical Journal                        | College of Medicine, University of Malawi and Medical Association of Malawi.          | Non-commercial | Malawi  | Malawi  | General | Yes | 1986 | 0.837 | 4  | yes | yes | no  |
| AJOL_49 | Medical Journal of Zambia                     | Zambia Medical Association                                                            | Non-commercial | Zambia  | Zambia  | General | Yes | 2008 | no    | 3  | no  | yes | no  |
| AJOL_50 | Nigerian Health Journal                       | Nigerian Medical Association                                                          | Non-commercial | Nigeria | Nigeria | General | Yes | 2008 | no    | 4  | no  | no  | no  |
| AJOL_51 | Nigerian Hospital Practice                    | CME Ventures                                                                          | Commercial     | Nigeria | Nigeria | General | No  | 2007 | no    | 24 | no  | no  | no  |
| AJOL_52 | Nigerian Journal of Clinical Medicine         | Association of Resident Doctors of the Lagos State University Teaching Hospital Ikeja | Non-commercial | Nigeria | Nigeria | General | No  | 2008 | no    | 2  | no  | no  | no  |
| AJOL_53 | Nigerian Journal of Clinical Practice         | Medknow Publications                                                                  | Commercial     | India   | Nigeria | General | Yes | 2001 | 0.524 | 6  | no  | no  | yes |

|         |                                                     |                                                                          |                |         |         |             |     |      |    |   |    |     |     |
|---------|-----------------------------------------------------|--------------------------------------------------------------------------|----------------|---------|---------|-------------|-----|------|----|---|----|-----|-----|
| AJOL_54 | Nigerian Journal of Family Practice                 | Society of Family Physicians of Nigeria. (SOFPON).                       | Non-commercial | Nigeria | Nigeria | Specialised | No  | 2012 | no | 2 | no | no  | no  |
| AJOL_55 | Nigerian Journal of Gastroenterology and Hepatology | Society for Gastroenterology & Hepatology                                | Non-commercial | Nigeria | Nigeria | Specialised | No  | 2009 | no | 4 | no | no  | no  |
| AJOL_56 | Nigerian Journal of General Practice                | Medknow Publications                                                     | Commercial     | India   | Nigeria | General     | Yes | 2011 | no | 2 | no | no  | yes |
| AJOL_57 | Nigerian Journal of Guidance and Counselling        | Department of Counsellor Education, University of Ilorin, Ilorin, Nigeri | Non-commercial | Nigeria | Nigeria | Specialised | No  | 1998 | no | 1 | no | no  | no  |
| AJOL_58 | Nigerian Journal of Medicine                        | University of Nigeria                                                    | Non-commercial | Nigeria | Nigeria | General     | No  | 2005 | no | 4 | no | no  | no  |
| AJOL_59 | Nigerian Journal of Natural Products and Medicine   | Nigerian Society of Pharmacognosy                                        | Non-commercial | Nigeria | Nigeria | Specialised | No  | 1997 | no | 1 | no | no  | no  |
| AJOL_60 | Nigerian Journal of Ophthalmology                   | Medknow Publications                                                     | Commercial     | India   | Nigeria | Specialised | Yes | 2000 | no | 2 | no | no  | yes |
| AJOL_61 | Nigerian Journal of Paediatrics                     | Paediatric Association of Nigeria                                        | Non-commercial | Nigeria | Nigeria | Specialised | Yes | 2001 | no | 4 | no | yes | no  |

|         |                                            |                                                   |                |         |         |             |     |      |    |    |    |    |     |
|---------|--------------------------------------------|---------------------------------------------------|----------------|---------|---------|-------------|-----|------|----|----|----|----|-----|
| AJOL_62 | Nigerian Journal of Parasitology           | Parasitology and Public Health Society of Nigeria | Non-commercial | Nigeria | Nigeria | Specialised | No  | 2000 | no | 2  | no | no | no  |
| AJOL_63 | Nigerian Journal of Physiological Sciences | Physiological Society of Nigeria                  | Non-commercial | Nigeria | Nigeria | Specialised | Yes | 2003 | no | 2  | no | no | no  |
| AJOL_64 | Nigerian Journal of Plastic Surgery        | Medknow Publications                              | Commercial     | India   | Nigeria | Specialised | Yes | 2006 | no | 2  | no | no | yes |
| AJOL_65 | Nigerian Journal of Psychiatry             | Associations of Psychiatrists in Nigeria          | Non-commercial | Nigeria | Nigeria | Specialised | No  | 2005 | no | 3  | no | no | no  |
| AJOL_66 | Nigerian Journal of Surgery                | Medknow Publications                              | Commercial     | India   | Nigeria | Specialised | Yes | 2009 | no | 2  | no | no | yes |
| AJOL_67 | Nigerian Journal of Surgical Research      | Medknow Publications                              | Commercial     | India   | Nigeria | Specialised | Yes | 2000 | no | 4  | no | no | yes |
| AJOL_68 | Nigerian Journal of Surgical Sciences      | Medknow Publications                              | Commercial     | India   | Nigeria | Specialised | Yes | 2005 | no | 2  | no | no | yes |
| AJOL_69 | Nigerian Medical Journal                   | Medknow Publications                              | Commercial     | India   | Nigeria | General     | Yes | 2005 | no | 4  | no | no | yes |
| AJOL_70 | Nigerian Medical Practitioner              | SAME ventures                                     | Commercial     | Nigeria | Nigeria | General     | No  | 2003 | no | 12 | no | no | no  |
| AJOL_71 | Nigerian Quarterly Journal of              | Lagos University Medical Society                  | Non-commercial | Nigeria | Nigeria | General     | No  | 2003 | no | 4  | no | no | no  |



|         |                                                               |                                                                                                                |                    |                 |                 |             |     |      |    |                      |     |     |     |
|---------|---------------------------------------------------------------|----------------------------------------------------------------------------------------------------------------|--------------------|-----------------|-----------------|-------------|-----|------|----|----------------------|-----|-----|-----|
|         | Hospital<br>Medicine                                          |                                                                                                                |                    |                 |                 |             |     |      |    |                      |     |     |     |
| AJOL_72 | Obstetrics and<br>Gynaecology<br>Forum                        | In House<br>Publications                                                                                       | Commercial         | South<br>Africa | South<br>Africa | Specialised | No  | 2002 | no | 4                    | no  | no  | no  |
| AJOL_73 | Orient Journal<br>of Medicine                                 | Nigerian<br>Medical<br>Association of<br>South-East<br>Nigeria                                                 | Non-<br>commercial | Nigeria         | Nigeria         | General     | Yes | 2003 | no | 4                    | no  | no  | no  |
| AJOL_74 | Pan African<br>Medical<br>Journal                             | PAMJ-Center<br>for Public<br>Health<br>Research and<br>Information<br>African Field<br>Epidemiology<br>Network | Non-<br>commercial | Kenya           | Kenya           | General     | Yes | 2008 | no | not<br>specifie<br>d | no  | yes | no  |
| AJOL_75 | Port Harcourt<br>Medical<br>Journal                           | Medknow<br>Publications                                                                                        | Commercial         | India           | Nigeria         | General     | Yes | 2006 | no | 3                    | no  | no  | yes |
| AJOL_76 | Research<br>Journal of<br>Health<br>Sciences                  | Osun State<br>University                                                                                       | Non-<br>commercial | Nigeria         | Nigeria         | General     | Yes | 2013 | no | 4                    | no  | no  | no  |
| AJOL_77 | Rwanda<br>Journal                                             | University of<br>Rwanda                                                                                        | Non-<br>commercial | Rwanda          | Rwanda          | General     | Yes | 2013 | no | 4                    | yes | no  | no  |
| AJOL_78 | SA Journal of<br>Radiology                                    | AOSIS<br>publishing                                                                                            | Commercial         | South<br>Africa | South<br>Africa | Specialised | Yes | 2004 | no | 4                    | no  | no  | yes |
| AJOL_79 | Sahel Medical<br>Journal                                      | Medknow<br>Publications                                                                                        | Commercial         | India           | Nigeria         | General     | Yes | 2002 | no | 4                    | no  | no  | yes |
| AJOL_80 | Savannah<br>Journal of<br>Medical<br>Research and<br>Practice | University of<br>Ilorin Teaching<br>Hospital                                                                   | Non-<br>commercial | Nigeria         | Nigeria         | General     | No  | 2012 | no | 2                    | no  | no  | no  |

|         |                                                                                |                                                                            |                |              |              |             |     |      |       |    |     |     |     |
|---------|--------------------------------------------------------------------------------|----------------------------------------------------------------------------|----------------|--------------|--------------|-------------|-----|------|-------|----|-----|-----|-----|
| AJOL_81 | Sierra Leone Journal of Biomedical Research                                    | College of Medicine and Allied Health Sciences, University of Sierra Leone | Non-commercial | Sierra Leone | Sierra Leone | General     | Yes | 2009 | no    | 3  | yes | yes | no  |
| AJOL_82 | South African Family Practice                                                  | Medpharm Publications                                                      | Commercial     | South Africa | South Africa | Specialised | Yes | 2002 | no    | 12 | no  | no  | no  |
| AJOL_83 | South African Gastroenterology Review                                          | In House Publications                                                      | Commercial     | South Africa | South Africa | Specialised | No  | 2003 | no    | 4  | no  | no  | no  |
| AJOL_84 | South African Journal for Research in Sport, Physical Education and Recreation | Stellenbosch University                                                    | Non-commercial | South Africa | South Africa | Specialised | No  | 2001 | no    | 2  | no  | no  | no  |
| AJOL_85 | South African Journal of Child Health                                          | Health & Medical Publishing Group                                          | Commercial     | South Africa | South Africa | Specialised | Yes | 2008 | no    | 4  | no  | no  | no  |
| AJOL_86 | South African Journal of Clinical Nutrition                                    | Medpharm Publications                                                      | Commercial     | South Africa | South Africa | Specialised | Yes | 2004 | no    | 4  | no  | no  | no  |
| AJOL_87 | South African Journal of Obstetrics and Gynaecology                            | Health & Medical Publishing Group                                          | Commercial     | South Africa | South Africa | Specialised | Yes | 2005 | no    | 3  | no  | no  | no  |
| AJOL_88 | South African Journal of Psychiatry                                            | AOSIS publishing                                                           | Commercial     | South Africa | South Africa | Specialised | Yes | 2002 | 0.193 | 1  | no  | yes | yes |
| AJOL_89 | South African Journal of                                                       | South African Sports                                                       | Non-commercial | South Africa | South Africa | Specialised | Yes | 2003 | no    | 3  | no  | no  | no  |

|         |                                                                   |                                                  |                    |                 |                 |             |     |      |       |    |    |     |     |
|---------|-------------------------------------------------------------------|--------------------------------------------------|--------------------|-----------------|-----------------|-------------|-----|------|-------|----|----|-----|-----|
|         | Sports<br>Medicine                                                | Medicine<br>Association                          |                    |                 |                 |             |     |      |       |    |    |     |     |
| AJOL_90 | South African<br>Journal of<br>Surgery                            | Health &<br>Medical<br>Publishing<br>Group       | Commercial         | South<br>Africa | South<br>Africa | Specialised | Yes | 2004 | 0.462 | 4  | no | no  | no  |
| AJOL_91 | South African<br>Medical<br>Journal                               | Health &<br>Medical<br>Publishing<br>Group       | Commercial         | South<br>Africa | South<br>Africa | General     | Yes | 1983 | 1.5   | 12 | no | no  | no  |
| AJOL_92 | South Sudan<br>Medical<br>Journal                                 | South Sudan<br>Doctors'<br>Association           | Non-<br>commercial | South<br>Sudan  | South<br>Sudan  | General     | Yes | 2008 | no    | 4  | no | no  | no  |
| AJOL_93 | Southern<br>African<br>Journal of<br>Anaesthesia<br>and Analgesia | Medpharm<br>publications                         | Commercial         | South<br>Africa | South<br>Africa | Specialised | Yes | 2002 | no    | 6  | no | no  | no  |
| AJOL_94 | Southern<br>African<br>Journal of<br>Critical Care                | Health &<br>Medical<br>Publishing<br>Group       | Commercial         | South<br>Africa | South<br>Africa | Specialised | Yes | 2004 | no    | 2  | no | no  | no  |
| AJOL_95 | Southern<br>African<br>Journal of HIV<br>Medicine                 | AOSIS<br>publishing                              | Commercial         | South<br>Africa | South<br>Africa | Specialised | Yes | 2000 | 0.529 | 1  | no | yes | yes |
| AJOL_96 | Sudan Journal<br>of Medical<br>Sciences                           | Omdurman<br>Islamic<br>University                | Non-<br>commercial | Sudan           | Sudan           | General     | Yes | 2006 | no    | 3  | no | no  | no  |
| AJOL_97 | Tanzania<br>Journal of<br>Health<br>Research                      | National<br>Institute for<br>Medical<br>Research | Non-<br>commercial | Tanzania        | Tanzania        | General     | Yes | 2001 | no    | 4  | no | no  | no  |
| AJOL_98 | Tropical<br>Journal of                                            | College of<br>Medicine,                          | Non-<br>commercial | Nigeria         | Nigeria         | General     | No  | 2005 | no    | 2  | no | no  | no  |

|          |                                                |                       |                |         |         |             |     |      |       |    |    |    |     |
|----------|------------------------------------------------|-----------------------|----------------|---------|---------|-------------|-----|------|-------|----|----|----|-----|
|          | Health Sciences                                | University of Ilorin  |                |         |         |             |     |      |       |    |    |    |     |
| AJOL_99  | Tropical Journal of Medical Research           | Medknow Publications  | Commercial     | India   | Nigeria | General     | Yes | 2004 | no    | 2  | no | no | yes |
| AJOL_100 | Tropical Journal of Obstetrics and Gynaecology | Medknow Publications  | Commercial     | India   | Nigeria | Specialised | Yes | 2001 | no    | 2  | no | no | yes |
| AJOL_101 | Tropical Journal of Pharmaceutical Research    | Pharmacotherapy Group | Non-commercial | Nigeria | Nigeria | Specialised | Yes | 2002 | 0.543 | 24 | no | no | no  |
| AJOL_102 | West African Journal of Radiology              | Medknow Publications  | Commercial     | India   | Nigeria | Specialised | No  | 2000 | no    | 1  | no | no | yes |

1  
2  
3  
4  
5  
6  
7  
8  
9  
10  
11  
12  
13  
14  
15  
16  
17  
18  
19  
20  
21  
22  
23  
24  
25  
26  
27  
28  
29  
30  
31  
32  
33  
34  
35  
36  
37  
38  
39  
40  
41  
42  
43  
44  
45  
46  
47  
48  
49  
50  
51  
52  
53  
54  
55  
56  
57  
58  
59  
60

For peer review only

## Supplementary file 4: Table of excluded journals

| Journal Name                                                           | Reason                                                    |
|------------------------------------------------------------------------|-----------------------------------------------------------|
| 1. Abia State University Medical Students' Association Journal         | Last issue in 2015                                        |
| 2. Africa Sanguine                                                     | Last issue in 2015                                        |
| 3. African Journal for the Psychological Study of Social Issues        | Not health research                                       |
| 4. African Journal of AIDS Research                                    | Not LMIC journal – Editor in chief not in LMIC            |
| 5. African Journal of Cross-Cultural Psychology and Sport Facilitation | Last issue 2008                                           |
| 6. African Journal of Environmental Science and Technology             | Not LMIC journal – Editor in chief not in LMIC            |
| 7. African Journal of Neurological Science                             | Not LMIC journal – Editor in chief not in LMIC            |
| 8. African Journal of Oral Health                                      | Last issue in 2006                                        |
| 9. African Journal of Oral Health Sciences                             | Last issue in 2008                                        |
| 10. African Journal of Physiotherapy and Rehabilitation Science        | Last issue in 2015                                        |
| 11. African Journal of Urology                                         | Not LMIC journal – Publisher not in LMIC                  |
| 12. Afrimedical Journal                                                | No issue in 2016                                          |
| 13. Alexandria Journal of Medicine                                     | Not LMIC journal – Publisher not in LMIC                  |
| 14. Annals of Pediatric Surgery                                        | Not LMIC journal – Publisher not in LMIC                  |
| 15. Arab Journal of Nephrology and Transplantation                     | Last issue in 2014                                        |
| 16. Archives of Ibadan Medicine                                        | Last issue in 2006                                        |
| 17. Archives of Medical and Biomedical Research                        | Not LMIC journal – Editor in chief not in LMIC            |
| 18. Benin Journal of Postgraduate Medicine                             | Last issue in 2010                                        |
| 19. Clinics in Mother and Child Health                                 | Not LMIC journal – Editor in chief and publisher not LMIC |
| 20. Continuing Medical Education                                       | Not LMIC journal – Publisher not in LMIC                  |
| 21. Counsellor (The)                                                   | Last issue in 2014                                        |
| 22. Dar Es Salaam Medical Students' Journal                            | Last issue in 2012                                        |
| 23. East African Journal of Public Health                              | Last issue in 2015                                        |
| 24. East and Central African Journal of Pharmaceutical Sciences        | Last issue in 2013                                        |
| 25. Ebonyi Medical Journal                                             | Last issue in 2012                                        |
| 26. Edo Journal of Counselling                                         | Last issue in 2011                                        |
| 27. Edo Journal of Counselling                                         | Last issue 2011                                           |
| 28. Egyptian Journal of Medical Human Genetics                         | Not LMIC journal – Publisher not in LMIC                  |
| 29. Egyptian Journal of Medical Laboratory Sciences                    | Last issue in 2001                                        |
| 30. Ethiopian Pharmaceutical Journal                                   | Last issue in 2015                                        |
| 31. Gender and Behaviour                                               | Not health research                                       |
| 32. Global Journal of Community Medicine                               | Last issue in 2009                                        |
| 33. Global Journal of Medical Sciences                                 | Last issue in 2011                                        |
| 34. Health SA Gesondheid                                               | Not LMIC journal – Publisher not in LMIC                  |
| 35. IMTU Medical Journal                                               | Last issue in 2015                                        |
| 36. Indo-Pacific Journal of Phenomenology                              | Not LMIC journal – Publisher not in LMIC                  |

|                                                                                      |                                                              |
|--------------------------------------------------------------------------------------|--------------------------------------------------------------|
| 37. International Journal of Emotional Psychology and Sport Ethics                   | Last issue 2008                                              |
| 38. International Journal of Health Research                                         | Last issue in 2012                                           |
| 39. International Journal of Malaria and Tropical Diseases (IJMTD)                   | Last issue in 2005                                           |
| 40. International Journal of Medicine and Health Development                         | Last issue in 2014                                           |
| 41. Journal of Biomedical Investigation                                              | Last issue 2009                                              |
| 42. Journal of Child and Adolescent Mental Health                                    | Not LMIC journal – Publisher not in LMIC                     |
| 43. Journal of Ethiopian Medical Practice                                            | Last issue in 2002                                           |
| 44. Journal of Health and Visual Sciences                                            | Last issue in 2015                                           |
| 45. Journal of Medical Investigation and Practice                                    | Last issue 2015                                              |
| 46. Journal of Medical Laboratory Science                                            | Last issue 2012                                              |
| 47. Journal of Medicine and Medical Science                                          | Last issue in 1999                                           |
| 48. Journal of Phytomedicine and Therapeutics                                        | Last issue 2015                                              |
| 49. Journal of Psychology in Africa                                                  | Not a LMIC journal – Publisher not in LMIC                   |
| 50. Journal of Surgical Technique and Case Report                                    | Last issue 2015                                              |
| 51. Journal of the Eritrean Medical Association                                      | Last issues 2009                                             |
| 52. Journal of the Nigerian Infection Control Association                            | Last issue 2001                                              |
| 53. Journal of the Nigerian Optometric Associatio                                    | Last issue in 2010                                           |
| 54. Journal of the Obafemi Awolowo University Medical Student's Association (IFEMED) | Last issue in 2014                                           |
| 55. Journal Tunisien d'ORL et de Chirurgie Cervico-Faciale                           | Publishes in French.                                         |
| 56. Libyan Journal of Medicine                                                       | Not LMIC journal – Editor in chief and publisher not in LMIC |
| 57. Mary Slessor Journal of Medicine                                                 | Last issue 2013                                              |
| 58. Nigerian Dental Journal                                                          | Last issue 2014                                              |
| 59. Nigerian Endocrine Practice                                                      | Last issue 2013                                              |
| 60. Nigerian Journal of Clinical and Counselling Psychology                          | Last issue 2002                                              |
| 61. Nigerian Journal of Health and Biomedical Sciences                               | Last issue 2010                                              |
| 62. Nigerian Journal of Nutritional Sciences                                         | Last issue 2012                                              |
| 63. Nigerian Journal of Orthopaedics and Trauma                                      | Last issue in 2013                                           |
| 64. Nigerian Journal of Otorhinolaryngology                                          | Last issue in 2006                                           |
| 65. Nigerian Journal of Pharmaceutical Research                                      | Last issue 2011                                              |
| 66. Nigerian Journal of Postgraduate Medicine                                        | Last issue 2010                                              |
| 67. Revue Africaine de Chirurgie et Spécialités                                      | Publishes in French                                          |
| 68. Revue de Médecine et de Pharmacie                                                | Publishes in French                                          |
| 69. Rwanda Journal of Health Sciences                                                | Last issue 2013                                              |
| 70. SAHARA-J: Journal of Social Aspects of HIV/AIDS                                  | Not LMIC journal – Publisher not in LMIC                     |
| 71. Science et Technique, Sciences de la Santé                                       | Last issue in 2015.                                          |
| 72. Scientific Medical Journal                                                       | Last issue 2001                                              |
| 73. Sokoto Journal of Veterinary Sciences                                            | Veterinary Medicine                                          |
| 74. Sudanese Journal of Dermatology                                                  | Last issue 2010                                              |
| 75. Tanzania Dental Journal                                                          | Last issue 2014                                              |
| 76. Tanzania Medical Journal                                                         | Last issue 2015                                              |

|                                                            |                    |
|------------------------------------------------------------|--------------------|
| 77. West African Journal of Medicine                       | Last issue in 2013 |
| 78. West African Journal of Pharmacology and Drug Research | Last issue in 2015 |
| 79. Zagazig Journal of Occupational Health and Safety      | Last issue 2010    |

For peer review only



1  
2  
3  
4  
5  
6  
7  
8  
9  
10  
11  
12  
13  
14  
15  
16  
17  
18  
19  
20  
21  
22  
23  
24  
25  
26  
27  
28  
29  
30  
31  
32  
33  
34  
35  
36  
37  
38  
39  
40  
41  
42  
43  
44  
45  
46  
47  
48  
49  
50  
51  
52  
53  
54  
55  
56  
57  
58  
59  
60

For peer review only

## Supplementary file 5: Levels of plagiarism and redundancy per section

| Total n=495       | Any       | Level 1:<br>1-2 sentences<br>copied | Level 2:<br>3-6 separate<br>sentences copied | Level 3:<br>4+ linked or<br>6+ separate<br>sentences copied |
|-------------------|-----------|-------------------------------------|----------------------------------------------|-------------------------------------------------------------|
| <i>Plagiarism</i> |           |                                     |                                              |                                                             |
| Abstract          | 49 (10%)  | 42 (8%)                             | 6 (1%)                                       | 1 (0.2%)                                                    |
| Introduction      | 232 (47%) | 113 (23%)                           | 67 (14%)                                     | 52 (11%)                                                    |
| Methods           | 148 (30%) | 86 (17%)                            | 53 (11%)                                     | 9 (2%)                                                      |
| Results           | 15 (3%)   | 8 (2%)                              | 6 (1%)                                       | 1 (0.2%)                                                    |
| Discussion        | 195 (39%) | 89 (18%)                            | 64 (13%)                                     | 42 (9%)                                                     |
| <i>Redundancy</i> |           |                                     |                                              |                                                             |
| Abstract          | 16 (3%)   | 9 (2%)                              | 5 (1%)                                       | 2 (0.4%)                                                    |
| Introduction      | 16 (3%)   | 7 (1%)                              | 4 (1%)                                       | 5 (1%)                                                      |
| Methods           | 52 (11%)  | 16 (3%)                             | 20 (4%)                                      | 16 (3%)                                                     |
| Results           | 13 (3%)   | 5 (1%)                              | 7 (1%)                                       | 1 (0.2%)                                                    |
| Discussion        | 13 (3%)   | 6 (1%)                              | 6 (1%)                                       | 1 (0.2%)                                                    |
