# Supplementary material for: Plagiarism in research: a survey of African medical journals
Source: PubMed Central journal article supplement — BMJ Open. 2018 Nov 8;8(11):e024777. doi: 10.1136/bmjopen-2018-024777 (PMC6231593; doi:10.1136/bmjopen-2018-024777), 2018-11-08
Supplement: bmjopen-2018-024777supp001.pdf [file bmjopen-2018-024777supp001.pdf]

## Supplementary file 1: Data extraction forms

### 1.1 Data extraction form for journal policies and guidelines

| <b>General information</b>                                       |     |           |
|------------------------------------------------------------------|-----|-----------|
| Journal name                                                     |     |           |
| Website                                                          |     |           |
| Scope                                                            |     |           |
| Publisher                                                        |     |           |
| Country where publisher is based                                 |     |           |
| Country where editor in chief is based                           |     |           |
| LMIC journal?                                                    | Yes |           |
|                                                                  | No  |           |
| Impact factor                                                    | Yes |           |
|                                                                  | No  |           |
| Publication frequency                                            |     |           |
| Open access                                                      | Yes |           |
|                                                                  | No  |           |
| Scope general?                                                   | Yes |           |
|                                                                  | No  |           |
| <b>Plagiarism</b>                                                |     |           |
| Policy available                                                 | Yes |           |
|                                                                  | No  |           |
| Description on what constitutes plagiarism?                      | Yes | Describe: |
|                                                                  | No  |           |
| Reference to plagiarism software?                                | Yes |           |
|                                                                  | No  |           |
| Consequences of plagiarism described?                            | Yes | Describe: |
|                                                                  | No  |           |
| Reference to COPE flow-diagram?                                  | Yes |           |
|                                                                  | No  |           |
| <b>Authorship</b>                                                |     |           |
| Guideline available                                              | Yes | Describe: |
|                                                                  | No  |           |
| Guideline in line with updated ICMJE criteria (i.e. 4 criteria)? | Yes |           |
|                                                                  | No  |           |
| Guideline in line with old ICMJE criteria (i.e. 3 criteria)?     | Yes |           |
|                                                                  | No  |           |
| Contributorship policy                                           | Yes | Describe: |
|                                                                  | No  |           |
| Information on acknowledgement practices                         | Yes | Describe  |
|                                                                  | No  |           |
| <b>Conflict of interest</b>                                      |     |           |
| Guideline available                                              | Yes |           |
|                                                                  | No  |           |

|                                        |     |          |
|----------------------------------------|-----|----------|
| Definition of a conflict of interest   | Yes | Describe |
|                                        | No  |          |
| Guidance on what to declare            | Yes |          |
|                                        | No  |          |
| <b>Funding sources</b>                 |     |          |
| Guideline available                    | Yes |          |
|                                        | No  |          |
| Information on what to declare         | Yes | Describe |
|                                        | No  |          |
| Guidance on how to declare funding     | Yes | Describe |
|                                        | No  |          |
| Funding statement in publication       | Yes |          |
|                                        | No  |          |
| <b>ICMJE</b>                           |     |          |
| Do they mention ICMJE recommendations? | Yes |          |
|                                        | No  |          |
| Is there a link to the ICMJE website?  | Yes |          |
|                                        | No  |          |
| Is there a link to the ICMJE document? | Yes |          |
|                                        | No  |          |
| Notes                                  |     |          |

## 1.2 Data extraction form for all research articles

|                                                                   |     |                                                                    |
|-------------------------------------------------------------------|-----|--------------------------------------------------------------------|
| <b>General information</b>                                        |     |                                                                    |
| Study ID                                                          |     |                                                                    |
| Type of study                                                     |     |                                                                    |
| Number of authors                                                 |     |                                                                    |
| Country of contact author                                         |     |                                                                    |
| <b>Authorship</b>                                                 |     |                                                                    |
| Did authors disclose contributions of authors?                    | Yes | Describe                                                           |
|                                                                   | No  |                                                                    |
| For each author: Which ICMJE criteria are met?                    | Yes |                                                                    |
|                                                                   | No  |                                                                    |
| Are any other contributors listed in the acknowledgement section? | Yes | Describe                                                           |
|                                                                   | No  |                                                                    |
| <b>Conflicts of interest</b>                                      |     |                                                                    |
| Did authors declare conflicts of interest                         | Yes | None known                                                         |
|                                                                   |     | Financial conflicts of interest                                    |
|                                                                   |     | Non-financial conflicts of interest                                |
| No                                                                |     |                                                                    |
| <b>Funding sources</b>                                            |     |                                                                    |
| Did authors disclose funding sources?                             | Yes | Commercial funding                                                 |
|                                                                   |     | Non-commercial external funding e.g. grants, NPOs, private funders |
|                                                                   |     | No external funding                                                |
| No                                                                |     |                                                                    |
| <b>Plagiarism</b>                                                 |     |                                                                    |
| Turnitin similarity score                                         |     |                                                                    |

|               |            |          |
|---------------|------------|----------|
| Score >10%?   | Yes        |          |
|               | No         |          |
| No plagiarism | Yes        |          |
|               | No         |          |
| Abstract      | Plagiarism | Level 1  |
|               |            | Level 2  |
|               |            | Level3   |
|               | Redundancy | Level 1  |
|               |            | Level 2  |
|               |            | Level3   |
| Introduction  | Plagiarism | Level 1  |
|               |            | Level 2  |
|               |            | Level3   |
|               | Redundancy | Level 1  |
|               |            | Level 2  |
|               |            | Level3   |
| Methods       | Plagiarism | Level 1  |
|               |            | Level 2  |
|               |            | Level3   |
|               | Redundancy | Level 1  |
|               |            | Level 2  |
|               |            | Level3   |
| Results       | Plagiarism | Level 1  |
|               |            | Level 2  |
|               |            | Level3   |
|               | Redundancy | Level 1  |
|               |            | Level 2  |
|               |            | Level3   |
| Discussion    | Plagiarism | Level 1  |
|               |            | Level 2  |
|               |            | Level3   |
|               | Redundancy | Level 1  |
|               |            | Level 2  |
|               |            | Level3   |
| Overall       | Plagiarism | Mild     |
|               |            | Moderate |
|               |            | Severe   |
|               | Redundancy | Mild     |
|               |            | Moderate |
|               |            | Severe   |
| Notes         |            |          |
