# Supplementary material for: Plagiarism in research: a survey of African medical journals
Source: PubMed Central journal article supplement — BMJ Open. 2018 Nov 8;8(11):e024777. doi: 10.1136/bmjopen-2018-024777 (PMC6231593; doi:10.1136/bmjopen-2018-024777), 2018-11-08
Supplement: bmjopen-2018-024777supp003.pdf [file bmjopen-2018-024777supp003.pdf]

Supplementary file 3: Characteristics of included journals

| Journal ID | Journal Name                                              | Publisher                                   | Type of publisher | Country      |                 | Scope       | Open access | First online issue | Impact Factor | Issues/year  | AJPP member | Member of COPE |           |
|------------|-----------------------------------------------------------|---------------------------------------------|-------------------|--------------|-----------------|-------------|-------------|--------------------|---------------|--------------|-------------|----------------|-----------|
|            |                                                           |                                             |                   | Publisher    | Editor-in-Chief |             |             |                    |               |              |             | Journal        | Publisher |
| AJOL_1     | African Health Sciences                                   | Faculty of Medicine, Makerere University    | Non-commercial    | Uganda       | Uganda          | General     | Yes         | 2001               | 0.642         | 4            | yes         | no             | no        |
| AJOL_2     | African Journal for Physical Activity and Health Sciences | LAM publications Limited                    | Commercial        | South Africa | South Africa    | General     | No          | 2002               | no            | 4            | no          | no             | no        |
| AJOL_3     | African Journal of Anaesthesia and Intensive Care         | Mirral Printing Press                       | Non-commercial    | Nigeria      | Nigeria         | Specialised | No          | 2008               | no            | 2            | no          | no             | no        |
| AJOL_4     | African Journal of Biomedical Research                    | Biomedical Communications Group             | Non-commercial    | Nigeria      | Nigeria         | General     | Yes         | 1999               | no            | 3            | no          | no             | no        |
| AJOL_5     | African Journal of Clinical and Experimental Microbiology | AJCEM Life line publishers                  | Non-commercial    | Nigeria      | Nigeria         | General     | Yes         | 2002               | no            | 3            | no          | no             | no        |
| AJOL_6     | African Journal of Drug and                               | African Centre for Research and Information | Non-commercial    | Nigeria      | Nigeria         | Specialised | Yes         | 2008               | no            | not reported | no          | no             | no        |

|         |                                                 |                                                                        |                |                                     |              |             |     |      |    |   |    |    |     |
|---------|-------------------------------------------------|------------------------------------------------------------------------|----------------|-------------------------------------|--------------|-------------|-----|------|----|---|----|----|-----|
|         | Alcohol Studies                                 | on Substance Abuse (CRISA)                                             |                |                                     |              |             |     |      |    |   |    |    |     |
| AJOL_7  | African Journal of Health Professions Education | Health and medical publishing group                                    | Commercial     | South Africa                        | South Africa | Specialised | Yes | 2009 | no | 2 | no | no | no  |
| AJOL_8  | African Journal of Health Sciences              | Kenya Medical Research Institute and African Forum for Health Sciences | Non-commercial | Kenya                               | Kenya        | General     | No  | 2002 | no | 4 | no | no | no  |
| AJOL_9  | African Journal of Infectious Disease           | Obafemi Awolowo University                                             | Non-commercial | Nigeria                             | Nigeria      | Specialised | Yes | 2007 | no | 2 | no | no | no  |
| AJOL_10 | African Journal of Paediatric Nephrology        | African Paediatric Nephrology Association (AFPNA)                      | Non-commercial | Nigeria                             | Nigeria      | Specialised | No  | 2014 | no | 2 | no | no | no  |
| AJOL_11 | African Journal of Paediatric Surgery           | Medknow Publications                                                   | Commercial     | India                               | Nigeria      | Specialised | Yes | 2004 | no | 2 | No | No | yes |
| AJOL_12 | African Journal of Reproductive Health          | Women's Health and Action Research Centre (WHARC)                      | Non-commercial | Nigeria                             | Nigeria      | Specialised | No  | 1999 | no | 4 | no | no | no  |
| AJOL_13 | African Journal of Rheumatology                 | African League of Associations for                                     | Non-commercial | Africa (regional offices in Africa) | South Africa | Specialised | No  | 2013 | no | 2 | no | no | no  |

|         |                                                                         |                                                          |                |          |          |             |     |      |       |               |     |    |     |
|---------|-------------------------------------------------------------------------|----------------------------------------------------------|----------------|----------|----------|-------------|-----|------|-------|---------------|-----|----|-----|
|         |                                                                         | Rheumatology (AFLAR)                                     |                |          |          |             |     |      |       |               |     |    |     |
| AJOL_14 | African Journal of Traditional, Complementary and Alternative Medicines | African Networks Ethnomedicines                          | Non-commercial | Nigeria  | Nigeria  | Specialised | No  | 2004 | 0.553 | 3             | no  | no | no  |
| AJOL_15 | Anatomy Journal of Africa                                               | Association of Anatomical Societies of Africa            | Non-commercial | Kenya    | Kenya    | Specialised | Yes | 2012 | no    | 2             | no  | no | no  |
| AJOL_16 | Annals of African Medicine                                              | Medknow Publications                                     | Commercial     | India    | Nigeria  | General     | Yes | 2002 | no    | 2             | no  | no | yes |
| AJOL_17 | Annals of African Surgery                                               | The Surgical Society of Kenya/Medics Management services | Non-commercial | Kenya    | Kenya    | Specialised | Yes | 2007 | no    | 2             | yes | no | no  |
| AJOL_18 | Annals of Ibadan Postgraduate Medicine                                  | Bookbuilders Africa                                      | Commercial     | Nigeria  | Nigeria  | General     | Yes | 2003 | no    | 2             | no  | no | no  |
| AJOL_19 | Annals of Medical and Health Sciences Research                          | Medknow Publications                                     | Commercial     | India    | Nigeria  | General     | Yes | 2011 | no    | not specified | no  | no | yes |
| AJOL_20 | Annals of Nigerian Medicine                                             | Medknow Publications                                     | Commercial     | India    | Nigeria  | General     | Yes | 2005 | no    | 2             | no  | no | yes |
| AJOL_21 | Central African                                                         | University of Zimbabwe                                   | Non-commercial | Zimbabwe | Zimbabwe | General     | No  | 1999 | no    | not specified | no  | no | no  |

|         |                                                            |                                                                                     |                |              |              |             |     |      |    |    |     |     |    |
|---------|------------------------------------------------------------|-------------------------------------------------------------------------------------|----------------|--------------|--------------|-------------|-----|------|----|----|-----|-----|----|
|         | Journal of Medicine                                        |                                                                                     |                |              |              |             |     |      |    |    |     |     |    |
| AJOL_22 | East African Medical Journal                               | Kenya Medical Association                                                           | Non-commercial | Kenya        | Kenya        | General     | No  | 1999 | no | 12 | no  | no  | no |
| AJOL_23 | East African Orthopaedic Journal                           | Kenya Orthopaedic Association                                                       | Non-commercial | Kenya        | Kenya        | Specialised | Yes | 2007 | no | 2  | no  | no  | no |
| AJOL_24 | East and Central African Journal of Surgery                | Association of Surgeons of East Africa/College of surgeons of East Africa (COSECSA) | Non-commercial | Tanzania     | Uganda       | Specialised | Yes | 1996 | no | 2  | no  | no  | no |
| AJOL_25 | Egyptian Journal of Pediatric Allergy and Immunology (The) | The Egyptian Society of Pediatric Allergy and Immunology                            | Non-commercial | Egypt        | Egypt        | Specialised | Yes | 2003 | no | 2  | no  | no  | no |
| AJOL_26 | Ergonomics SA                                              | Ergonomics Society of South Africa                                                  | Non-commercial | South Africa | South Africa | Specialised | No  | 2008 | no | 2  | no  | no  | no |
| AJOL_27 | Ethiopian Journal of Health Development                    | Ethiopian Public Health Society                                                     | Non-commercial | Ethiopia     | Ethiopia     | General     | Yes | 2000 | no | 3  | no  | no  | no |
| AJOL_28 | Ethiopian Journal of Health Sciences                       | Jimma University                                                                    | Non-commercial | Ethiopia     | Ethiopia     | General     | Yes | 1999 | no | 6  | yes | yes | no |
| AJOL_29 | Ghana Medical Journal                                      | Ghana Medical Association                                                           | Non-commercial | Ghana        | Ghana        | General     | Yes | 2004 | no | 4  | yes | yes | no |

|         |                                                                 |                                                                     |                |           |           |             |     |      |    |   |    |     |    |
|---------|-----------------------------------------------------------------|---------------------------------------------------------------------|----------------|-----------|-----------|-------------|-----|------|----|---|----|-----|----|
| AJOL_31 | Highland Medical Research Journal                               | Highland Medical Research Limited                                   | Non-commercial | Nigeria   | Nigeria   | General     | No  | 2002 | no | 2 | no | no  | no |
| AJOL_32 | IFE Psychologia                                                 | The Ife Center for Psychological Studies                            | Non-commercial | Nigeria   | Nigeria   | Specialised | No  | 1998 | no | 2 | no | no  | no |
| AJOL_33 | International Journal of Basic, Applied and Innovative Research | Anthony Research publications                                       | Non-commercial | Nigeria   | Nigeria   | General     | Yes | 2012 | no | 4 | no | no  | no |
| AJOL_34 | International Journal of Herbs and Pharmacological Research     | Anthony Research publications                                       | Non-commercial | Nigeria   | Nigeria   | Specialised | Yes | 2012 | no | 4 | no | no  | no |
| AJOL_35 | International Journal of Medicine and Biomedical Research       | Michael Joanna Publications                                         | Commercial     | Nigeria   | Nigeria   | General     | Yes | 2012 | no | 3 | no | yes | no |
| AJOL_36 | Internet Journal of Medical Update - EJOURNAL                   | AKS publication                                                     | Commercial     | Mauritius | Mauritius | General     | Yes | 2006 | no | 2 | no | no  | no |
| AJOL_37 | Jos Journal of Medicine                                         | Association of Resident Doctors of Jos University Teaching Hospital | Non-commercial | Nigeria   | Nigeria   | General     | Yes | 2009 | no | 3 | no | no  | no |

|         |                                                                    |                                                                           |                |              |              |             |     |      |    |               |    |    |     |
|---------|--------------------------------------------------------------------|---------------------------------------------------------------------------|----------------|--------------|--------------|-------------|-----|------|----|---------------|----|----|-----|
| AJOL_38 | Journal of Basic and Clinical Reproductive Sciences                | Nigerian Medical Association                                              | Non-commercial | Nigeria      | Nigeria      | Specialised | Yes | 2012 | no | 2             | no | no | no  |
| AJOL_40 | Journal of Community Medicine and Primary Health Care              | Association of Community Physicians of Nigeria                            | Non-commercial | Nigeria      | Nigeria      | Specialised | Yes | 2004 | no | 2             | no | no | no  |
| AJOL_41 | Journal of Endocrinology , Metabolism and Diabetes of South Africa | Medpharm Publications                                                     | Commercial     | South Africa | South Africa | Specialised | Yes | 2004 | no | 3             | no | no | no  |
| AJOL_42 | Journal of Experimental and Clinical Anatomy                       | Medknow Publications                                                      | Commercial     | India        | Nigeria      | Specialised | Yes | 2003 | no | 2             | no | no | yes |
| AJOL_43 | Journal of Medical and Biomedical Sciences                         | School of Medicine and Health Science, University for Development Studies | Non-commercial | Ghana        | Ghana        | General     | Yes | 2012 | no | not specified | no | no | no  |
| AJOL_44 | Journal of Medicine and Biomedical Research                        | Fine Print and Manufacturer Ltd                                           | Commercial     | Nigeria      | Nigeria      | General     | Yes | 2002 | no | 2             | no | no | no  |
| AJOL_45 | Journal of Medicine in the Tropics                                 | Medknow Publications                                                      | Commercial     | India        | Nigeria      |             | Yes | 2002 | no | 2             | no | no | yes |
| AJOL_46 | Journal of Obstetrics and                                          | Kenya Obstetrical                                                         | Non-commercial | Kenya        | Kenya        | Specialised | No  | 2011 | no | 4             | no | no | no  |

|         |                                               |                                                                                       |                |         |         |         |     |      |       |    |     |     |     |
|---------|-----------------------------------------------|---------------------------------------------------------------------------------------|----------------|---------|---------|---------|-----|------|-------|----|-----|-----|-----|
|         | Gynaecology of Eastern and Central Africa     | and Gynaecological Society (KOGS)                                                     |                |         |         |         |     |      |       |    |     |     |     |
| AJOL_47 | Journal of Pharmaceutical and Allied Sciences | Department of Pharmaceutics University of Nigeria                                     | Non-commercial | Nigeria | Nigeria | General | No  | 2004 | no    | 2  | no  | yes | no  |
| AJOL_48 | Malawi Medical Journal                        | College of Medicine, University of Malawi and Medical Association of Malawi.          | Non-commercial | Malawi  | Malawi  | General | Yes | 1986 | 0.837 | 4  | yes | yes | no  |
| AJOL_49 | Medical Journal of Zambia                     | Zambia Medical Association                                                            | Non-commercial | Zambia  | Zambia  | General | Yes | 2008 | no    | 3  | no  | yes | no  |
| AJOL_50 | Nigerian Health Journal                       | Nigerian Medical Association                                                          | Non-commercial | Nigeria | Nigeria | General | Yes | 2008 | no    | 4  | no  | no  | no  |
| AJOL_51 | Nigerian Hospital Practice                    | CME Ventures                                                                          | Commercial     | Nigeria | Nigeria | General | No  | 2007 | no    | 24 | no  | no  | no  |
| AJOL_52 | Nigerian Journal of Clinical Medicine         | Association of Resident Doctors of the Lagos State University Teaching Hospital Ikeja | Non-commercial | Nigeria | Nigeria | General | No  | 2008 | no    | 2  | no  | no  | no  |
| AJOL_53 | Nigerian Journal of Clinical Practice         | Medknow Publications                                                                  | Commercial     | India   | Nigeria | General | Yes | 2001 | 0.524 | 6  | no  | no  | yes |

|         |                                                     |                                                                          |                |         |         |             |     |      |    |   |    |     |     |
|---------|-----------------------------------------------------|--------------------------------------------------------------------------|----------------|---------|---------|-------------|-----|------|----|---|----|-----|-----|
| AJOL_54 | Nigerian Journal of Family Practice                 | Society of Family Physicians of Nigeria. (SOFPON).                       | Non-commercial | Nigeria | Nigeria | Specialised | No  | 2012 | no | 2 | no | no  | no  |
| AJOL_55 | Nigerian Journal of Gastroenterology and Hepatology | Society for Gastroenterology & Hepatology                                | Non-commercial | Nigeria | Nigeria | Specialised | No  | 2009 | no | 4 | no | no  | no  |
| AJOL_56 | Nigerian Journal of General Practice                | Medknow Publications                                                     | Commercial     | India   | Nigeria | General     | Yes | 2011 | no | 2 | no | no  | yes |
| AJOL_57 | Nigerian Journal of Guidance and Counselling        | Department of Counsellor Education, University of Ilorin, Ilorin, Nigeri | Non-commercial | Nigeria | Nigeria | Specialised | No  | 1998 | no | 1 | no | no  | no  |
| AJOL_58 | Nigerian Journal of Medicine                        | University of Nigeria                                                    | Non-commercial | Nigeria | Nigeria | General     | No  | 2005 | no | 4 | no | no  | no  |
| AJOL_59 | Nigerian Journal of Natural Products and Medicine   | Nigerian Society of Pharmacognosy                                        | Non-commercial | Nigeria | Nigeria | Specialised | No  | 1997 | no | 1 | no | no  | no  |
| AJOL_60 | Nigerian Journal of Ophthalmology                   | Medknow Publications                                                     | Commercial     | India   | Nigeria | Specialised | Yes | 2000 | no | 2 | no | no  | yes |
| AJOL_61 | Nigerian Journal of Paediatrics                     | Paediatric Association of Nigeria                                        | Non-commercial | Nigeria | Nigeria | Specialised | Yes | 2001 | no | 4 | no | yes | no  |



|         |                                            |                                                   |                |         |         |             |     |      |    |    |    |    |     |
|---------|--------------------------------------------|---------------------------------------------------|----------------|---------|---------|-------------|-----|------|----|----|----|----|-----|
| AJOL_62 | Nigerian Journal of Parasitology           | Parasitology and Public Health Society of Nigeria | Non-commercial | Nigeria | Nigeria | Specialised | No  | 2000 | no | 2  | no | no | no  |
| AJOL_63 | Nigerian Journal of Physiological Sciences | Physiological Society of Nigeria                  | Non-commercial | Nigeria | Nigeria | Specialised | Yes | 2003 | no | 2  | no | no | no  |
| AJOL_64 | Nigerian Journal of Plastic Surgery        | Medknow Publications                              | Commercial     | India   | Nigeria | Specialised | Yes | 2006 | no | 2  | no | no | yes |
| AJOL_65 | Nigerian Journal of Psychiatry             | Associations of Psychiatrists in Nigeria          | Non-commercial | Nigeria | Nigeria | Specialised | No  | 2005 | no | 3  | no | no | no  |
| AJOL_66 | Nigerian Journal of Surgery                | Medknow Publications                              | Commercial     | India   | Nigeria | Specialised | Yes | 2009 | no | 2  | no | no | yes |
| AJOL_67 | Nigerian Journal of Surgical Research      | Medknow Publications                              | Commercial     | India   | Nigeria | Specialised | Yes | 2000 | no | 4  | no | no | yes |
| AJOL_68 | Nigerian Journal of Surgical Sciences      | Medknow Publications                              | Commercial     | India   | Nigeria | Specialised | Yes | 2005 | no | 2  | no | no | yes |
| AJOL_69 | Nigerian Medical Journal                   | Medknow Publications                              | Commercial     | India   | Nigeria | General     | Yes | 2005 | no | 4  | no | no | yes |
| AJOL_70 | Nigerian Medical Practitioner              | SAME ventures                                     | Commercial     | Nigeria | Nigeria | General     | No  | 2003 | no | 12 | no | no | no  |
| AJOL_71 | Nigerian Quarterly Journal of              | Lagos University Medical Society                  | Non-commercial | Nigeria | Nigeria | General     | No  | 2003 | no | 4  | no | no | no  |

|         |                                                               |                                                                                                                |                    |                 |                 |             |     |      |    |                      |     |     |     |
|---------|---------------------------------------------------------------|----------------------------------------------------------------------------------------------------------------|--------------------|-----------------|-----------------|-------------|-----|------|----|----------------------|-----|-----|-----|
|         | Hospital<br>Medicine                                          |                                                                                                                |                    |                 |                 |             |     |      |    |                      |     |     |     |
| AJOL_72 | Obstetrics and<br>Gynaecology<br>Forum                        | In House<br>Publications                                                                                       | Commercial         | South<br>Africa | South<br>Africa | Specialised | No  | 2002 | no | 4                    | no  | no  | no  |
| AJOL_73 | Orient Journal<br>of Medicine                                 | Nigerian<br>Medical<br>Association of<br>South-East<br>Nigeria                                                 | Non-<br>commercial | Nigeria         | Nigeria         | General     | Yes | 2003 | no | 4                    | no  | no  | no  |
| AJOL_74 | Pan African<br>Medical<br>Journal                             | PAMJ-Center<br>for Public<br>Health<br>Research and<br>Information<br>African Field<br>Epidemiology<br>Network | Non-<br>commercial | Kenya           | Kenya           | General     | Yes | 2008 | no | not<br>specifie<br>d | no  | yes | no  |
| AJOL_75 | Port Harcourt<br>Medical<br>Journal                           | Medknow<br>Publications                                                                                        | Commercial         | India           | Nigeria         | General     | Yes | 2006 | no | 3                    | no  | no  | yes |
| AJOL_76 | Research<br>Journal of<br>Health<br>Sciences                  | Osun State<br>University                                                                                       | Non-<br>commercial | Nigeria         | Nigeria         | General     | Yes | 2013 | no | 4                    | no  | no  | no  |
| AJOL_77 | Rwanda<br>Journal                                             | University of<br>Rwanda                                                                                        | Non-<br>commercial | Rwanda          | Rwanda          | General     | Yes | 2013 | no | 4                    | yes | no  | no  |
| AJOL_78 | SA Journal of<br>Radiology                                    | AOSIS<br>publishing                                                                                            | Commercial         | South<br>Africa | South<br>Africa | Specialised | Yes | 2004 | no | 4                    | no  | no  | yes |
| AJOL_79 | Sahel Medical<br>Journal                                      | Medknow<br>Publications                                                                                        | Commercial         | India           | Nigeria         | General     | Yes | 2002 | no | 4                    | no  | no  | yes |
| AJOL_80 | Savannah<br>Journal of<br>Medical<br>Research and<br>Practice | University of<br>Ilorin Teaching<br>Hospital                                                                   | Non-<br>commercial | Nigeria         | Nigeria         | General     | No  | 2012 | no | 2                    | no  | no  | no  |

|         |                                                                                |                                                                            |                |              |              |             |     |      |       |    |     |     |     |
|---------|--------------------------------------------------------------------------------|----------------------------------------------------------------------------|----------------|--------------|--------------|-------------|-----|------|-------|----|-----|-----|-----|
| AJOL_81 | Sierra Leone Journal of Biomedical Research                                    | College of Medicine and Allied Health Sciences, University of Sierra Leone | Non-commercial | Sierra Leone | Sierra Leone | General     | Yes | 2009 | no    | 3  | yes | yes | no  |
| AJOL_82 | South African Family Practice                                                  | Medpharm Publications                                                      | Commercial     | South Africa | South Africa | Specialised | Yes | 2002 | no    | 12 | no  | no  | no  |
| AJOL_83 | South African Gastroenterology Review                                          | In House Publications                                                      | Commercial     | South Africa | South Africa | Specialised | No  | 2003 | no    | 4  | no  | no  | no  |
| AJOL_84 | South African Journal for Research in Sport, Physical Education and Recreation | Stellenbosch University                                                    | Non-commercial | South Africa | South Africa | Specialised | No  | 2001 | no    | 2  | no  | no  | no  |
| AJOL_85 | South African Journal of Child Health                                          | Health & Medical Publishing Group                                          | Commercial     | South Africa | South Africa | Specialised | Yes | 2008 | no    | 4  | no  | no  | no  |
| AJOL_86 | South African Journal of Clinical Nutrition                                    | Medpharm Publications                                                      | Commercial     | South Africa | South Africa | Specialised | Yes | 2004 | no    | 4  | no  | no  | no  |
| AJOL_87 | South African Journal of Obstetrics and Gynaecology                            | Health & Medical Publishing Group                                          | Commercial     | South Africa | South Africa | Specialised | Yes | 2005 | no    | 3  | no  | no  | no  |
| AJOL_88 | South African Journal of Psychiatry                                            | AOSIS publishing                                                           | Commercial     | South Africa | South Africa | Specialised | Yes | 2002 | 0.193 | 1  | no  | yes | yes |
| AJOL_89 | South African Journal of                                                       | South African Sports                                                       | Non-commercial | South Africa | South Africa | Specialised | Yes | 2003 | no    | 3  | no  | no  | no  |

|         |                                                                   |                                                  |                    |                 |                 |             |     |      |       |    |    |     |     |
|---------|-------------------------------------------------------------------|--------------------------------------------------|--------------------|-----------------|-----------------|-------------|-----|------|-------|----|----|-----|-----|
|         | Sports<br>Medicine                                                | Medicine<br>Association                          |                    |                 |                 |             |     |      |       |    |    |     |     |
| AJOL_90 | South African<br>Journal of<br>Surgery                            | Health &<br>Medical<br>Publishing<br>Group       | Commercial         | South<br>Africa | South<br>Africa | Specialised | Yes | 2004 | 0.462 | 4  | no | no  | no  |
| AJOL_91 | South African<br>Medical<br>Journal                               | Health &<br>Medical<br>Publishing<br>Group       | Commercial         | South<br>Africa | South<br>Africa | General     | Yes | 1983 | 1.5   | 12 | no | no  | no  |
| AJOL_92 | South Sudan<br>Medical<br>Journal                                 | South Sudan<br>Doctors'<br>Association           | Non-<br>commercial | South<br>Sudan  | South<br>Sudan  | General     | Yes | 2008 | no    | 4  | no | no  | no  |
| AJOL_93 | Southern<br>African<br>Journal of<br>Anaesthesia<br>and Analgesia | Medpharm<br>publications                         | Commercial         | South<br>Africa | South<br>Africa | Specialised | Yes | 2002 | no    | 6  | no | no  | no  |
| AJOL_94 | Southern<br>African<br>Journal of<br>Critical Care                | Health &<br>Medical<br>Publishing<br>Group       | Commercial         | South<br>Africa | South<br>Africa | Specialised | Yes | 2004 | no    | 2  | no | no  | no  |
| AJOL_95 | Southern<br>African<br>Journal of HIV<br>Medicine                 | AOSIS<br>publishing                              | Commercial         | South<br>Africa | South<br>Africa | Specialised | Yes | 2000 | 0.529 | 1  | no | yes | yes |
| AJOL_96 | Sudan Journal<br>of Medical<br>Sciences                           | Omdurman<br>Islamic<br>University                | Non-<br>commercial | Sudan           | Sudan           | General     | Yes | 2006 | no    | 3  | no | no  | no  |
| AJOL_97 | Tanzania<br>Journal of<br>Health<br>Research                      | National<br>Institute for<br>Medical<br>Research | Non-<br>commercial | Tanzania        | Tanzania        | General     | Yes | 2001 | no    | 4  | no | no  | no  |
| AJOL_98 | Tropical<br>Journal of                                            | College of<br>Medicine,                          | Non-<br>commercial | Nigeria         | Nigeria         | General     | No  | 2005 | no    | 2  | no | no  | no  |

|          |                                                |                       |                |         |         |             |     |      |       |    |    |    |     |
|----------|------------------------------------------------|-----------------------|----------------|---------|---------|-------------|-----|------|-------|----|----|----|-----|
|          | Health Sciences                                | University of Ilorin  |                |         |         |             |     |      |       |    |    |    |     |
| AJOL_99  | Tropical Journal of Medical Research           | Medknow Publications  | Commercial     | India   | Nigeria | General     | Yes | 2004 | no    | 2  | no | no | yes |
| AJOL_100 | Tropical Journal of Obstetrics and Gynaecology | Medknow Publications  | Commercial     | India   | Nigeria | Specialised | Yes | 2001 | no    | 2  | no | no | yes |
| AJOL_101 | Tropical Journal of Pharmaceutical Research    | Pharmacotherapy Group | Non-commercial | Nigeria | Nigeria | Specialised | Yes | 2002 | 0.543 | 24 | no | no | no  |
| AJOL_102 | West African Journal of Radiology              | Medknow Publications  | Commercial     | India   | Nigeria | Specialised | No  | 2000 | no    | 1  | no | no | yes |
