# Supplementary material for: Plagiarism in research: a survey of African medical journals
Source: PubMed Central journal article supplement — BMJ Open. 2018 Nov 8;8(11):e024777. doi: 10.1136/bmjopen-2018-024777 (PMC6231593; doi:10.1136/bmjopen-2018-024777), 2018-11-08
Supplement: bmjopen-2018-024777supp004.pdf [file bmjopen-2018-024777supp004.pdf]

## Supplementary file 4: Table of excluded journals

| Journal Name                                                           | Reason                                                    |
|------------------------------------------------------------------------|-----------------------------------------------------------|
| 1. Abia State University Medical Students' Association Journal         | Last issue in 2015                                        |
| 2. Africa Sanguine                                                     | Last issue in 2015                                        |
| 3. African Journal for the Psychological Study of Social Issues        | Not health research                                       |
| 4. African Journal of AIDS Research                                    | Not LMIC journal – Editor in chief not in LMIC            |
| 5. African Journal of Cross-Cultural Psychology and Sport Facilitation | Last issue 2008                                           |
| 6. African Journal of Environmental Science and Technology             | Not LMIC journal – Editor in chief not in LMIC            |
| 7. African Journal of Neurological Science                             | Not LMIC journal – Editor in chief not in LMIC            |
| 8. African Journal of Oral Health                                      | Last issue in 2006                                        |
| 9. African Journal of Oral Health Sciences                             | Last issue in 2008                                        |
| 10. African Journal of Physiotherapy and Rehabilitation Science        | Last issue in 2015                                        |
| 11. African Journal of Urology                                         | Not LMIC journal – Publisher not in LMIC                  |
| 12. Afrimedical Journal                                                | No issue in 2016                                          |
| 13. Alexandria Journal of Medicine                                     | Not LMIC journal – Publisher not in LMIC                  |
| 14. Annals of Pediatric Surgery                                        | Not LMIC journal – Publisher not in LMIC                  |
| 15. Arab Journal of Nephrology and Transplantation                     | Last issue in 2014                                        |
| 16. Archives of Ibadan Medicine                                        | Last issue in 2006                                        |
| 17. Archives of Medical and Biomedical Research                        | Not LMIC journal – Editor in chief not in LMIC            |
| 18. Benin Journal of Postgraduate Medicine                             | Last issue in 2010                                        |
| 19. Clinics in Mother and Child Health                                 | Not LMIC journal – Editor in chief and publisher not LMIC |
| 20. Continuing Medical Education                                       | Not LMIC journal – Publisher not in LMIC                  |
| 21. Counsellor (The)                                                   | Last issue in 2014                                        |
| 22. Dar Es Salaam Medical Students' Journal                            | Last issue in 2012                                        |
| 23. East African Journal of Public Health                              | Last issue in 2015                                        |
| 24. East and Central African Journal of Pharmaceutical Sciences        | Last issue in 2013                                        |
| 25. Ebonyi Medical Journal                                             | Last issue in 2012                                        |
| 26. Edo Journal of Counselling                                         | Last issue in 2011                                        |
| 27. Edo Journal of Counselling                                         | Last issue 2011                                           |
| 28. Egyptian Journal of Medical Human Genetics                         | Not LMIC journal – Publisher not in LMIC                  |
| 29. Egyptian Journal of Medical Laboratory Sciences                    | Last issue in 2001                                        |
| 30. Ethiopian Pharmaceutical Journal                                   | Last issue in 2015                                        |
| 31. Gender and Behaviour                                               | Not health research                                       |
| 32. Global Journal of Community Medicine                               | Last issue in 2009                                        |
| 33. Global Journal of Medical Sciences                                 | Last issue in 2011                                        |
| 34. Health SA Gesondheid                                               | Not LMIC journal – Publisher not in LMIC                  |
| 35. IMTU Medical Journal                                               | Last issue in 2015                                        |
| 36. Indo-Pacific Journal of Phenomenology                              | Not LMIC journal – Publisher not in LMIC                  |

|                                                                                      |                                                              |
|--------------------------------------------------------------------------------------|--------------------------------------------------------------|
| 37. International Journal of Emotional Psychology and Sport Ethics                   | Last issue 2008                                              |
| 38. International Journal of Health Research                                         | Last issue in 2012                                           |
| 39. International Journal of Malaria and Tropical Diseases (IJMTD)                   | Last issue in 2005                                           |
| 40. International Journal of Medicine and Health Development                         | Last issue in 2014                                           |
| 41. Journal of Biomedical Investigation                                              | Last issue 2009                                              |
| 42. Journal of Child and Adolescent Mental Health                                    | Not LMIC journal – Publisher not in LMIC                     |
| 43. Journal of Ethiopian Medical Practice                                            | Last issue in 2002                                           |
| 44. Journal of Health and Visual Sciences                                            | Last issue in 2015                                           |
| 45. Journal of Medical Investigation and Practice                                    | Last issue 2015                                              |
| 46. Journal of Medical Laboratory Science                                            | Last issue 2012                                              |
| 47. Journal of Medicine and Medical Science                                          | Last issue in 1999                                           |
| 48. Journal of Phytomedicine and Therapeutics                                        | Last issue 2015                                              |
| 49. Journal of Psychology in Africa                                                  | Not a LMIC journal – Publisher not in LMIC                   |
| 50. Journal of Surgical Technique and Case Report                                    | Last issue 2015                                              |
| 51. Journal of the Eritrean Medical Association                                      | Last issues 2009                                             |
| 52. Journal of the Nigerian Infection Control Association                            | Last issue 2001                                              |
| 53. Journal of the Nigerian Optometric Associatio                                    | Last issue in 2010                                           |
| 54. Journal of the Obafemi Awolowo University Medical Student's Association (IFEMED) | Last issue in 2014                                           |
| 55. Journal Tunisien d'ORL et de Chirurgie Cervico-Faciale                           | Publishes in French.                                         |
| 56. Libyan Journal of Medicine                                                       | Not LMIC journal – Editor in chief and publisher not in LMIC |
| 57. Mary Slessor Journal of Medicine                                                 | Last issue 2013                                              |
| 58. Nigerian Dental Journal                                                          | Last issue 2014                                              |
| 59. Nigerian Endocrine Practice                                                      | Last issue 2013                                              |
| 60. Nigerian Journal of Clinical and Counselling Psychology                          | Last issue 2002                                              |
| 61. Nigerian Journal of Health and Biomedical Sciences                               | Last issue 2010                                              |
| 62. Nigerian Journal of Nutritional Sciences                                         | Last issue 2012                                              |
| 63. Nigerian Journal of Orthopaedics and Trauma                                      | Last issue in 2013                                           |
| 64. Nigerian Journal of Otorhinolaryngology                                          | Last issue in 2006                                           |
| 65. Nigerian Journal of Pharmaceutical Research                                      | Last issue 2011                                              |
| 66. Nigerian Journal of Postgraduate Medicine                                        | Last issue 2010                                              |
| 67. Revue Africaine de Chirurgie et Spécialités                                      | Publishes in French                                          |
| 68. Revue de Médecine et de Pharmacie                                                | Publishes in French                                          |
| 69. Rwanda Journal of Health Sciences                                                | Last issue 2013                                              |
| 70. SAHARA-J: Journal of Social Aspects of HIV/AIDS                                  | Not LMIC journal – Publisher not in LMIC                     |
| 71. Science et Technique, Sciences de la Santé                                       | Last issue in 2015.                                          |
| 72. Scientific Medical Journal                                                       | Last issue 2001                                              |
| 73. Sokoto Journal of Veterinary Sciences                                            | Veterinary Medicine                                          |
| 74. Sudanese Journal of Dermatology                                                  | Last issue 2010                                              |
| 75. Tanzania Dental Journal                                                          | Last issue 2014                                              |
| 76. Tanzania Medical Journal                                                         | Last issue 2015                                              |

|                                                            |                    |
|------------------------------------------------------------|--------------------|
| 77. West African Journal of Medicine                       | Last issue in 2013 |
| 78. West African Journal of Pharmacology and Drug Research | Last issue in 2015 |
| 79. Zagazig Journal of Occupational Health and Safety      | Last issue 2010    |
