# Supplementary material for: Plagiarism in research: a survey of African medical journals
Source: PubMed Central journal article supplement — BMJ Open. 2018 Nov 8;8(11):e024777. doi: 10.1136/bmjopen-2018-024777 (PMC6231593; doi:10.1136/bmjopen-2018-024777), 2018-11-08
Supplement: bmjopen-2018-024777supp005.pdf [file bmjopen-2018-024777supp005.pdf]

Supplementary file 5: Levels of plagiarism and redundancy per section

| <b>Total n=495</b> | <b>Any</b> | <b>Level 1:<br/>1-2 sentences<br/>copied</b> | <b>Level 2:<br/>3-6 separate<br/>sentences copied</b> | <b>Level 3:<br/>4+ linked or<br/>6+ separate<br/>sentences copied</b> |
|--------------------|------------|----------------------------------------------|-------------------------------------------------------|-----------------------------------------------------------------------|
| <i>Plagiarism</i>  |            |                                              |                                                       |                                                                       |
| Abstract           | 49 (10%)   | 42 (8%)                                      | 6 (1%)                                                | 1 (0.2%)                                                              |
| Introduction       | 232 (47%)  | 113 (23%)                                    | 67 (14%)                                              | 52 (11%)                                                              |
| Methods            | 148 (30%)  | 86 (17%)                                     | 53 (11%)                                              | 9 (2%)                                                                |
| Results            | 15 (3%)    | 8 (2%)                                       | 6 (1%)                                                | 1 (0.2%)                                                              |
| Discussion         | 195 (39%)  | 89 (18%)                                     | 64 (13%)                                              | 42 (9%)                                                               |
| <i>Redundancy</i>  |            |                                              |                                                       |                                                                       |
| Abstract           | 16 (3%)    | 9 (2%)                                       | 5 (1%)                                                | 2 (0.4%)                                                              |
| Introduction       | 16 (3%)    | 7 (1%)                                       | 4 (1%)                                                | 5 (1%)                                                                |
| Methods            | 52 (11%)   | 16 (3%)                                      | 20 (4%)                                               | 16 (3%)                                                               |
| Results            | 13 (3%)    | 5 (1%)                                       | 7 (1%)                                                | 1 (0.2%)                                                              |
| Discussion         | 13 (3%)    | 6 (1%)                                       | 6 (1%)                                                | 1 (0.2%)                                                              |
